# Supplementary material for: Regulation of the BMP Signaling-Responsive Transcriptional Network in the Drosophila Embryo
Source: PLoS Genet. 2016 Jul 5;12(7):e1006164. doi: 10.1371/journal.pgen.1006164 (PMC4933369; doi:10.1371/journal.pgen.1006164)
Supplement: S3 Dataset — Data show integration over distances of 5, 10, 20 and 40 kb. Start and end coordinates relate to the peak summits. The ‘gene to peak’ data show genes within the indicated distance listed against the ChIP peaks, whereas the reciprocal matching is shown for the ‘peak to gene’ data. (XLSX) [file pgen.1006164.s008.xlsx]

## Sheet: 5kb_Gene_to_Peak
#chr	start	end	feature.id_1	feature.id_2	feature.id_3	feature.id_4
chr2R	4959563	4959564	CG8084-RA	.	.	.
chr3R	12882217	12882218	.	.	.	.
chr2R	7084865	7084866	.	.	.	.
chr2L	8846878	8846879	.	.	.	.
chr3L	14143549	14143550	.	.	.	.
chr2L	8872575	8872576	.	.	.	.
chrX	7201745	7201746	CG9653-RA	.	.	.
chr3L	12642288	12642289	.	.	.	.
chr3L	900525	900526	.	.	.	.
chr3R	11925615	11925616	.	.	.	.
chr2L	518626	518627	CG2762-RA	.	.	.
chrX	7216230	7216231	.	.	.	.
chr2L	9146490	9146491	.	.	.	.
chr3L	14145113	14145114	.	.	.	.
chrX	7215050	7215051	.	.	.	.
chr3L	744524	744525	.	.	.	.
chr2R	5943941	5943942	CG2264-RB	.	.	.
chr3L	15032667	15032668	.	.	.	.
chrX	7187612	7187613	.	.	.	.
chr3L	14958126	14958127	.	.	.	.
chr3R	11244147	11244148	.	.	.	.
chr2R	7086553	7086554	.	.	.	.
chr2L	8842031	8842032	.	.	.	.
chr2L	20204591	20204592	.	.	.	.
chr2L	8849388	8849389	.	.	.	.
chr2L	19575963	19575964	.	.	.	.
chr3R	17431466	17431467	.	.	.	.
chr3L	699499	699500	.	.	.	.
chrX	7193930	7193931	.	.	.	.
chrX	5590793	5590794	.	.	.	.
chr2R	4958868	4958869	CG8084-RA	.	.	.
chr2L	91520	91521	FlyExpress_net	.	.	.
chr2L	12666270	12666271	.	.	.	.
chr2L	18895473	18895474	.	.	.	.
chr2R	5964776	5964777	CG12919-RA	.	.	.
chr3R	21472938	21472939	.	.	.	.
chr3L	21269968	21269969	.	.	.	.
chr3L	640490	640491	.	.	.	.
chr3L	14445769	14445770	.	.	.	.
chrX	8188244	8188245	.	.	.	.
chr3L	5849766	5849767	.	.	.	.
chr2L	249243	249244	.	.	.	.
chr2L	8876062	8876063	.	.	.	.
chr3R	2636547	2636548	.	.	.	.
chr3R	2588944	2588945	FlyExpress_Ama	.	.	.
chr2L	8416931	8416932	.	.	.	.
chr2L	13225403	13225404	FlyExpress_CG15480	.	.	.
chr3R	11854359	11854360	.	.	.	.
chr3L	18214359	18214360	.	.	.	.
chr3R	3467989	3467990	.	.	.	.
chr2L	20822813	20822814	.	.	.	.
chr3L	9849000	9849001	CG6721-RA	.	.	.
chr3R	3938777	3938778	.	.	.	.
chr3L	16171819	16171820	.	.	.	.
chr3R	5154744	5154745	.	.	.	.
chr3R	19712439	19712440	.	.	.	.
chr3R	397155	397156	.	.	.	.
chr2L	8825446	8825447	CG18024-RA	.	.	.
chr3R	25133011	25133012	.	.	.	.
chr3L	9032270	9032271	CG5133-RA	.	.	.
chr3L	11686023	11686024	.	.	.	.
chr2R	5943172	5943173	CG2264-RB	.	.	.
chr3R	2916973	2916974	.	.	.	.
chrX	17262828	17262829	.	.	.	.
chr3L	162070	162071	.	.	.	.
chr3R	5960211	5960212	.	.	.	.
chrX	12548561	12548562	CG2028-RC	.	.	.
chr3R	2934263	2934264	.	.	.	.
chr3L	14950036	14950037	.	.	.	.
chr2R	5378382	5378383	CG1916-RA	.	.	.
chr3R	16118438	16118439	.	.	.	.
chr3R	25373766	25373767	.	.	.	.
chr3R	11246479	11246480	.	.	.	.
chr2R	9467441	9467442	.	.	.	.
chrX	7195399	7195400	.	.	.	.
chr2L	19161472	19161473	.	.	.	.
chr3L	7903514	7903515	.	.	.	.
chr2R	6470052	6470053	.	.	.	.
chrX	21858561	21858562	.	.	.	.
chr3R	6442739	6442740	.	.	.	.
chr3L	8996581	8996582	CG5093-RA	.	.	.
chrX	19660005	19660006	.	.	.	.
chr2R	20944710	20944711	CG3388-RA	.	.	.
chr3R	21856502	21856503	FlyExpress_e(spl)m5-HLH	.	.	.
chr2R	11017260	11017261	.	.	.	.
chr2R	6470932	6470933	.	.	.	.
chrX	5793939	5793940	.	.	.	.
chr2L	11447798	11447799	FlyExpress_Salm	.	.	.
chrX	19192424	19192425	.	.	.	.
chr2L	2451128	2451129	.	.	.	.
chr2R	17536634	17536635	CG10082-RB	.	.	.
chr2R	8846263	8846264	.	.	.	.
chr2R	5945423	5945424	CG2264-RB	.	.	.
chr2L	21629319	21629320	.	.	.	.
chr2L	2454829	2454830	.	.	.	.
chr3L	9035479	9035480	CG5133-RA	.	.	.
chrX	8307084	8307085	.	.	.	.
chr3L	9033834	9033835	CG5133-RA	.	.	.
chr2R	17252224	17252225	.	.	.	.
chr3R	17273421	17273422	.	.	.	.
chrX	7186407	7186408	.	.	.	.
chr2L	12011953	12011954	.	.	.	.
chrX	5641219	5641220	.	.	.	.
chr2R	19094615	19094616	.	.	.	.
chr3L	2385879	2385880	CG13800-RA	.	.	.
chr3L	6760307	6760308	.	.	.	.
chr2L	8841513	8841514	.	.	.	.
chr2L	12007443	12007444	.	.	.	.
chr3L	5987155	5987156	.	.	.	.
chr3L	2438348	2438349	.	.	.	.
chr3R	2549554	2549555	.	.	.	.
chr3R	5205073	5205074	.	.	.	.
chr2R	15954265	15954266	.	.	.	.
chrX	7200186	7200187	CG9653-RA	.	.	.
chr2L	15478477	15478478	.	.	.	.
chr2L	2457153	2457154	.	.	.	.
chr2R	8883838	8883839	.	.	.	.
chr3R	24889099	24889100	.	.	.	.
chr2L	11450691	11450692	.	.	.	.
chr3L	19901836	19901837	.	.	.	.
chrX	3671474	3671475	.	.	.	.
chr3R	265	266	.	.	.	.
chrX	8785925	8785926	.	.	.	.
chr3R	19169169	19169170	.	.	.	.
chr2R	5602192	5602193	FlyExpress_Dap	.	.	.
chr3R	12774464	12774465	.	.	.	.
chr3L	9037074	9037075	CG5133-RA	.	.	.
chr3L	9848010	9848011	CG6721-RA	.	.	.
chrX	7122990	7122991	.	.	.	.
chr2R	11015555	11015556	.	.	.	.
chr2L	6088479	6088480	CG18783-RB	.	.	.
chr2L	19576985	19576986	.	.	.	.
chr3L	3374188	3374189	.	.	.	.
chr3R	17442134	17442135	.	.	.	.
chr2L	11445995	11445996	FlyExpress_Salm	.	.	.
chr3L	2867746	2867747	.	.	.	.
chr3L	14961201	14961202	.	.	.	.
chr2L	13851169	13851170	.	.	.	.
chr3L	5976170	5976171	.	.	.	.
chr3R	16078934	16078935	.	.	.	.
chr2L	19865729	19865730	.	.	.	.
chr3L	21469834	21469835	.	.	.	.
chr2R	20995332	20995333	.	.	.	.
chr3L	1479189	1479190	.	.	.	.
chrX	3673905	3673906	.	.	.	.
chr2L	2449047	2449048	.	.	.	.
chr2L	6724456	6724457	.	.	.	.
chr2R	7079321	7079322	.	.	.	.
chr3R	25596904	25596905	CG33956-RD	.	.	.
chr3L	3037895	3037896	FlyExpress_CG2162	.	.	.
chr2R	17255140	17255141	.	.	.	.
chr2R	7071092	7071093	.	.	.	.
chr3R	12067209	12067210	.	.	.	.
chrX	18137619	18137620	.	.	.	.
chr3L	15038510	15038511	.	.	.	.
chr3L	8668945	8668946	.	.	.	.
chr2R	5729980	5729981	.	.	.	.
chr3R	15861864	15861865	.	.	.	.
chr3L	5850332	5850333	.	.	.	.
chr2L	18890339	18890340	.	.	.	.
chr3R	19555969	19555970	.	.	.	.
chr2R	8879357	8879358	.	.	.	.
chrX	6588703	6588704	.	.	.	.
chr3R	7204381	7204382	.	.	.	.
chr3R	25409361	25409362	.	.	.	.
chr2R	13689401	13689402	.	.	.	.
chr3L	13067575	13067576	.	.	.	.
chr3L	16484426	16484427	.	.	.	.
chr2L	6079096	6079097	.	.	.	.
chrX	9580547	9580548	.	.	.	.
chr3R	2817792	2817793	.	.	.	.
chr3L	14129104	14129105	.	.	.	.
chr2L	8365861	8365862	.	.	.	.
chrX	15780837	15780838	.	.	.	.
chr2R	15614438	15614439	.	.	.	.
chrX	7831924	7831925	.	.	.	.
chr2R	17390243	17390244	.	.	.	.
chr3R	16655690	16655691	.	.	.	.
chr2L	1954697	1954698	.	.	.	.
chr2R	17411491	17411492	.	.	.	.
chr3L	16468980	16468981	.	.	.	.
chr3R	12456538	12456539	.	.	.	.
chr3R	4293619	4293620	.	.	.	.
chr2R	12527682	12527683	.	.	.	.
chr3R	2892933	2892934	.	.	.	.
chr3R	15158054	15158055	.	.	.	.
chr3L	5862838	5862839	.	.	.	.
chr2R	13709901	13709902	.	.	.	.
chr3R	18498857	18498858	.	.	.	.
chr2R	19460607	19460608	.	.	.	.
chr3L	16037005	16037006	.	.	.	.
chr3R	23468226	23468227	.	.	.	.
chr2R	20401610	20401611	.	.	.	.
chr2R	17362848	17362849	.	.	.	.
chr2R	7604164	7604165	CG13194-RB	.	.	.
chr2L	12010526	12010527	.	.	.	.
chr2L	2454072	2454073	.	.	.	.
chr3R	23757428	23757429	.	.	.	.
chr2R	17362357	17362358	.	.	.	.
chr3L	14139541	14139542	.	.	.	.
chrX	17683690	17683691	.	.	.	.
chrX	8936219	8936220	.	.	.	.
chr3L	698637	698638	.	.	.	.
chr2L	10056990	10056991	.	.	.	.
chrX	2359943	2359944	.	.	.	.
chr2L	481272	481273	.	.	.	.
chr3R	16369035	16369036	.	.	.	.
chr2R	2550773	2550774	.	.	.	.
chr3L	11580356	11580357	.	.	.	.
chr2R	4543280	4543281	.	.	.	.
chr3R	11494862	11494863	.	.	.	.
chr3R	4031460	4031461	.	.	.	.
chr2R	2404102	2404103	.	.	.	.
chrX	13263707	13263708	.	.	.	.
chr3L	21019622	21019623	.	.	.	.
chr2L	15319925	15319926	.	.	.	.
chrX	2879520	2879521	.	.	.	.
chr2L	19137009	19137010	.	.	.	.
chrX	12644575	12644576	.	.	.	.
chr2L	16286633	16286634	.	.	.	.
chr3R	27047079	27047080	.	.	.	.
chr2R	13935510	13935511	.	.	.	.
chr3R	15164946	15164947	.	.	.	.
chr2R	16215512	16215513	.	.	.	.
chr2L	13235405	13235406	.	.	.	.
chr3R	11860019	11860020	.	.	.	.
chr2L	19324875	19324876	.	.	.	.
chrX	4317930	4317931	.	.	.	.
chr3R	12893645	12893646	.	.	.	.
chr2L	18783350	18783351	.	.	.	.
chr3R	14447047	14447048	.	.	.	.
chr2L	16859209	16859210	.	.	.	.
chr3R	12528848	12528849	.	.	.	.
chrX	9445155	9445156	.	.	.	.
chr2L	15324500	15324501	.	.	.	.
chr2L	13549170	13549171	.	.	.	.
chr3R	16118849	16118850	.	.	.	.
chrX	5584555	5584556	.	.	.	.
chr2R	8883117	8883118	.	.	.	.
chr3L	5987431	5987432	.	.	.	.
chr3R	4856038	4856039	CG11988-RA	.	.	.
chr3R	12229329	12229330	.	.	.	.
chr3L	9010275	9010276	CG5187-RA	.	.	.
chr3L	8998185	8998186	CG5093-RA	.	.	.
chr2L	12011095	12011096	.	.	.	.
chr3R	864836	864837	.	.	.	.
chr2R	3940305	3940306	.	.	.	.
chr2L	12461144	12461145	.	.	.	.
chr3L	16037529	16037530	.	.	.	.
chr2R	8906966	8906967	.	.	.	.
chr3R	913029	913030	.	.	.	.
chrX	19783175	19783176	.	.	.	.
chr4	717483	717484	.	.	.	.
chr3R	14814204	14814205	.	.	.	.
chr2R	20770210	20770211	.	.	.	.
chrX	16531592	16531593	.	.	.	.
chr2L	9150217	9150218	.	.	.	.
chr3R	12589628	12589629	.	.	.	.
chr3L	15037250	15037251	.	.	.	.
chr3R	12544656	12544657	.	.	.	.
chr3R	7603930	7603931	.	.	.	.
chr3L	8500377	8500378	.	.	.	.
chr3R	8471765	8471766	CG6234-RA	CG6753-RA	.	.
chrX	5795734	5795735	.	.	.	.
chr2L	7519888	7519889	.	.	.	.
chrX	16549930	16549931	.	.	.	.
chr3L	8072913	8072914	CG34373-RG	.	.	.
chr3L	2881792	2881793	.	.	.	.
chr3R	10481001	10481002	.	.	.	.
chr3R	20692751	20692752	.	.	.	.
chr3R	12887711	12887712	.	.	.	.
chr3R	21325796	21325797	.	.	.	.
chr2R	17250948	17250949	.	.	.	.
chr2R	12047621	12047622	CG8434-RA	.	.	.
chrX	12557719	12557720	.	.	.	.
chr3R	25111826	25111827	.	.	.	.
chrX	1128135	1128136	.	.	.	.
chr3R	14754344	14754345	.	.	.	.
chrX	2876668	2876669	.	.	.	.
chr2R	5329004	5329005	.	.	.	.
chr3L	2439248	2439249	.	.	.	.
chr2L	16601760	16601761	.	.	.	.
chrX	6716815	6716816	.	.	.	.
chr3R	10282964	10282965	.	.	.	.
chrX	17402590	17402591	.	.	.	.
chr2R	16013873	16013874	.	.	.	.
chr3R	1474298	1474299	.	.	.	.
chrX	20565158	20565159	.	.	.	.
chr3R	10679871	10679872	.	.	.	.
chrX	21239958	21239959	.	.	.	.
chr3L	319749	319750	.	.	.	.
chr2R	8872670	8872671	.	.	.	.
chr3R	7824045	7824046	.	.	.	.
chr2L	11358554	11358555	.	.	.	.
chrX	8189447	8189448	.	.	.	.
chr2L	17222440	17222441	.	.	.	.
chr3R	6783246	6783247	.	.	.	.
chr2R	19462206	19462207	.	.	.	.
chr2L	2449953	2449954	.	.	.	.
chrX	6443944	6443945	.	.	.	.
chr3R	4013330	4013331	.	.	.	.
chr3L	9034243	9034244	CG5133-RA	.	.	.
chr3R	19169578	19169579	.	.	.	.
chr3R	14816768	14816769	.	.	.	.
chrX	19658856	19658857	.	.	.	.
chrX	15850392	15850393	.	.	.	.
chr3R	12887385	12887386	.	.	.	.
chr3L	22260225	22260226	.	.	.	.
chrX	8569073	8569074	.	.	.	.
chr3L	14124816	14124817	.	.	.	.
chr2R	4535899	4535900	.	.	.	.
chr3R	12906836	12906837	.	.	.	.
chr3R	19172142	19172143	.	.	.	.
chr2R	18690912	18690913	.	.	.	.
chr3L	9034632	9034633	CG5133-RA	.	.	.
chr3L	5975099	5975100	.	.	.	.
chr2L	15330872	15330873	.	.	.	.
chr3L	9415795	9415796	.	.	.	.
chr2L	9602293	9602294	.	.	.	.
chr3L	22396090	22396091	.	.	.	.
chr2L	12529934	12529935	.	.	.	.
chr3R	837	838	.	.	.	.
chrX	5589778	5589779	.	.	.	.
chr3L	21278866	21278867	.	.	.	.
chr3R	5811619	5811620	.	.	.	.
chrX	17071987	17071988	.	.	.	.
chr3R	1037154	1037155	.	.	.	.
chr2R	17211310	17211311	.	.	.	.
chr3R	13959655	13959656	.	.	.	.
chr2L	5239877	5239878	.	.	.	.
chr3L	639829	639830	.	.	.	.
chr3R	1414068	1414069	.	.	.	.
chr2L	523080	523081	CG2762-RA	.	.	.
chr2R	3918566	3918567	.	.	.	.
chr3L	4230537	4230538	.	.	.	.
chr3R	2580238	2580239	CG1046-RA	.	.	.
chrX	9176840	9176841	.	.	.	.
chrX	4319122	4319123	.	.	.	.
chr2R	595299	595300	.	.	.	.
chr2L	14435949	14435950	.	.	.	.
chr3R	12378056	12378057	.	.	.	.
chrX	8189854	8189855	.	.	.	.
chr2L	5461641	5461642	CG6634-RA	.	.	.
chr2L	2945966	2945967	.	.	.	.
chr3L	762263	762264	.	.	.	.
chr2L	9121101	9121102	.	.	.	.
chr3R	1438298	1438299	.	.	.	.
chr3R	8472086	8472087	CG6234-RA	CG6753-RA	.	.
chrX	1718048	1718049	.	.	.	.
chr3R	18353595	18353596	FlyExpress_CG33099	.	.	.
chr2R	20743008	20743009	.	.	.	.
chr2L	6323901	6323902	CG9491-RC	.	.	.
chr3R	3282792	3282793	.	.	.	.
chr2R	17363360	17363361	.	.	.	.
chr3R	13430902	13430903	.	.	.	.
chr3R	8837918	8837919	.	.	.	.
chr3L	5853503	5853504	.	.	.	.
chr2L	8832489	8832490	.	.	.	.
chr2L	15323573	15323574	.	.	.	.
chr3R	12674546	12674547	.	.	.	.
chr2L	16817404	16817405	.	.	.	.
chr3L	14146196	14146197	.	.	.	.
chr2L	8276627	8276628	.	.	.	.
chr3L	21472802	21472803	.	.	.	.
chr2L	9449326	9449327	CG3779-RA	.	.	.
chr3R	3939887	3939888	.	.	.	.
chr3R	683895	683896	.	.	.	.
chr3L	2429131	2429132	.	.	.	.
chr3R	12056206	12056207	.	.	.	.
chr3L	14170756	14170757	.	.	.	.
chr3R	17432624	17432625	.	.	.	.
chr2R	9335554	9335555	.	.	.	.
chr2L	19135351	19135352	.	.	.	.
chrX	6883107	6883108	.	.	.	.
chr2R	14560881	14560882	.	.	.	.
chr2L	4821278	4821279	.	.	.	.
chr3R	9638595	9638596	.	.	.	.
chr2R	7072242	7072243	.	.	.	.
chr3R	11897775	11897776	.	.	.	.
chr2R	5180166	5180167	.	.	.	.
chr2L	18875263	18875264	.	.	.	.
chr3R	11855352	11855353	.	.	.	.
chrX	3735875	3735876	.	.	.	.
chr3R	9510687	9510688	.	.	.	.
chr3L	22169811	22169812	.	.	.	.
chr3R	12057569	12057570	.	.	.	.
chr2R	18578151	18578152	.	.	.	.
chrX	417476	417477	.	.	.	.
chr2L	8415799	8415800	.	.	.	.
chrX	9360626	9360627	.	.	.	.
chrX	2018210	2018211	.	.	.	.
chr3R	2826727	2826728	.	.	.	.
chr2R	7905297	7905298	.	.	.	.
chr3R	12884871	12884872	.	.	.	.
chrX	9638283	9638284	.	.	.	.
chr2L	4893741	4893742	.	.	.	.
chr3L	14540178	14540179	FlyExpress_CG9238	.	.	.
chr3R	7198573	7198574	CG17228-RF	.	.	.
chrX	7853141	7853142	.	.	.	.
chr3R	12783634	12783635	.	.	.	.
chr2R	5965706	5965707	CG12919-RA	.	.	.
chrX	22257134	22257135	.	.	.	.
chr3R	7179365	7179366	.	.	.	.
chr3R	8471139	8471140	CG6234-RA	CG6753-RA	.	.
chrX	13564833	13564834	CG11164-RA	.	.	.
chr3L	8826150	8826151	.	.	.	.
chr3R	11820189	11820190	.	.	.	.
chr2R	3306271	3306272	.	.	.	.
chr2R	7087312	7087313	.	.	.	.
chr3L	10850955	10850956	.	.	.	.
chr3R	21021124	21021125	CG13653-RA	CG13654-RA	.	.
chr3L	9449143	9449144	.	.	.	.
chr2L	7038695	7038696	.	.	.	.
chr2L	13227215	13227216	FlyExpress_CG15480	.	.	.
chr2L	2448472	2448473	.	.	.	.
chr2R	4872646	4872647	.	.	.	.
chr2R	17138292	17138293	.	.	.	.
chr2R	12038295	12038296	.	.	.	.
chr2L	1420247	1420248	CG5481-RA	.	.	.
chr3L	22393441	22393442	.	.	.	.
chr2L	8416161	8416162	.	.	.	.
chr2L	13905227	13905228	CG8827-RA	CG16869-RA	.	.
chrX	7211289	7211290	.	.	.	.
chr2L	9988507	9988508	.	.	.	.
chr3R	14380550	14380551	.	.	.	.
chr2L	9167150	9167151	.	.	.	.
chr2L	20783315	20783316	.	.	.	.
chrX	10716877	10716878	CG1691-RF	.	.	.
chr2R	10921923	10921924	.	.	.	.
chr2L	7420061	7420062	.	.	.	.
chrX	14642747	14642748	CG10521-RA	.	.	.
chr3R	4007324	4007325	.	.	.	.
chr3L	12640693	12640694	.	.	.	.
chr2R	2020358	2020359	.	.	.	.
chr3R	6469293	6469294	CG17117-RE	.	.	.
chr2R	9457102	9457103	.	.	.	.
chr3L	11546228	11546229	.	.	.	.
chr3L	682632	682633	.	.	.	.
chr3L	10856136	10856137	.	.	.	.
chr3L	15033653	15033654	.	.	.	.
chrX	8331575	8331576	.	.	.	.
chr2R	17138739	17138740	.	.	.	.
chr2L	11807159	11807160	CG14938-RD	.	.	.
chr3R	11810712	11810713	.	.	.	.
chr2R	8867911	8867912	.	.	.	.
chrX	19742907	19742908	.	.	.	.
chr2R	17251583	17251584	.	.	.	.
chr2R	6446420	6446421	.	.	.	.
chr3L	19172580	19172581	.	.	.	.
chr3L	16005724	16005725	.	.	.	.
chr3R	3944086	3944087	.	.	.	.
chr3L	6814430	6814431	.	.	.	.
chr2L	19323862	19323863	.	.	.	.
chr3R	20098396	20098397	CG13610-RA	.	.	.
chrX	15705985	15705986	.	.	.	.
chr2L	19791243	19791244	.	.	.	.
chr2R	9471674	9471675	.	.	.	.
chr3R	13275185	13275186	.	.	.	.
chr2L	18839494	18839495	.	.	.	.
chr2L	17752422	17752423	.	.	.	.
chr2L	15732174	15732175	CG3938-RB	.	.	.
chr3L	13371495	13371496	CG10717-RA	.	.	.
chrX	7854645	7854646	.	.	.	.
chr2R	16533924	16533925	.	.	.	.
chr2R	11563951	11563952	.	.	.	.
chr3L	12685910	12685911	.	.	.	.
chr2R	11563323	11563324	.	.	.	.
chr3R	10645567	10645568	.	.	.	.
chr2L	89353	89354	FlyExpress_net	.	.	.
chrX	1134058	1134059	.	.	.	.
chr3R	25115132	25115133	.	.	.	.
chr3R	11924492	11924493	.	.	.	.
chr3R	7178692	7178693	.	.	.	.
chr3L	9013891	9013892	CG5187-RA	.	.	.
chrX	13262611	13262612	.	.	.	.
chr2R	16801662	16801663	.	.	.	.
chrX	21342630	21342631	.	.	.	.
chr2L	5461323	5461324	CG6634-RA	.	.	.
chr2L	18150109	18150110	.	.	.	.
chr2R	11266274	11266275	.	.	.	.
chr2L	3822774	3822775	.	.	.	.
chr2R	15921164	15921165	.	.	.	.
chr2L	14512775	14512776	.	.	.	.
chr2R	2873286	2873287	.	.	.	.
chr2R	9472194	9472195	.	.	.	.
chrX	12636090	12636091	.	.	.	.
chrX	4484161	4484162	.	.	.	.
chr3L	15658730	15658731	.	.	.	.
chr2R	7070145	7070146	.	.	.	.
chr3R	5705463	5705464	.	.	.	.
chr3L	22938139	22938140	.	.	.	.
chr2L	13049006	13049007	.	.	.	.
chr2L	19156369	19156370	.	.	.	.
chr2R	17250562	17250563	.	.	.	.
chr2R	15423248	15423249	.	.	.	.
chr2R	10898409	10898410	.	.	.	.
chr3L	21873757	21873758	.	.	.	.
chr2L	5458760	5458761	CG6634-RA	.	.	.
chrX	580814	580815	.	.	.	.
chr3R	12878700	12878701	.	.	.	.
chr2L	5306627	5306628	.	.	.	.
chr3L	9012699	9012700	CG5187-RA	.	.	.
chr2L	5799393	5799394	.	.	.	.
chrX	8936774	8936775	.	.	.	.
chr2L	15320489	15320490	.	.	.	.
chr3L	11003521	11003522	CG12296-RA	.	.	.
chrX	19645163	19645164	.	.	.	.
chr2R	6471921	6471922	.	.	.	.
chrX	7841120	7841121	.	.	.	.
chr3L	11230167	11230168	.	.	.	.
chr3L	18396303	18396304	.	.	.	.
chr2L	10003795	10003796	.	.	.	.
chr2L	13548206	13548207	.	.	.	.
chr2L	20770527	20770528	FlyExpress_cad	.	.	.
chr3R	2826525	2826526	.	.	.	.
chr3R	7198188	7198189	CG17228-RF	.	.	.
chr3R	11413227	11413228	.	.	.	.
chr3R	12637612	12637613	.	.	.	.
chr3R	25590063	25590064	CG33956-RD	.	.	.
chr2R	6471318	6471319	.	.	.	.
chr2R	17211063	17211064	.	.	.	.
chr2R	20688449	20688450	.	.	.	.
chrX	511694	511695	.	.	.	.
chrX	1293789	1293790	.	.	.	.
chrX	1935722	1935723	.	.	.	.
chrX	3636532	3636533	.	.	.	.
chrX	6879808	6879809	.	.	.	.
chrX	8936430	8936431	.	.	.	.
chrX	8942133	8942134	.	.	.	.
chrX	11923080	11923081	.	.	.	.
chrX	12646063	12646064	.	.	.	.
chrX	14643192	14643193	CG10521-RA	.	.	.
chrX	17724837	17724838	.	.	.	.
chr3L	224839	224840	.	.	.	.
chr3L	258276	258277	.	.	.	.
chr3L	378266	378267	CG6883-RA	.	.	.
chr3L	668732	668733	.	.	.	.
chr3L	779709	779710	.	.	.	.
chr3L	872570	872571	.	.	.	.
chr3L	1334816	1334817	.	.	.	.
chr3L	1352218	1352219	.	.	.	.
chr3L	1731131	1731132	.	.	.	.
chr3L	2437114	2437115	.	.	.	.
chr3L	3197621	3197622	.	.	.	.
chr3L	3411435	3411436	.	.	.	.
chr3L	3593871	3593872	.	.	.	.
chr3L	4252359	4252360	CG15010-RA	.	.	.
chr3L	4253025	4253026	CG15010-RA	.	.	.
chr3L	5597381	5597382	CG10591-RA	.	.	.
chr3L	5729345	5729346	.	.	.	.
chr3L	5976279	5976280	.	.	.	.
chr3L	6178025	6178026	.	.	.	.
chr3L	6182216	6182217	.	.	.	.
chr3L	6274529	6274530	.	.	.	.
chr3L	6282219	6282220	.	.	.	.
chr3L	6384251	6384252	.	.	.	.
chr3L	6389626	6389627	.	.	.	.
chr3L	6757987	6757988	.	.	.	.
chr3L	7721512	7721513	.	.	.	.
chr3L	8068112	8068113	CG34373-RG	.	.	.
chr3L	8100462	8100463	.	.	.	.
chr3L	8109198	8109199	.	.	.	.
chr3L	8569167	8569168	.	.	.	.
chr3L	8819138	8819139	.	.	.	.
chr3L	8820343	8820344	.	.	.	.
chr3L	8826657	8826658	.	.	.	.
chr3L	9146200	9146201	.	.	.	.
chr3L	9428666	9428667	.	.	.	.
chr3L	9454339	9454340	.	.	.	.
chr3L	10311902	10311903	.	.	.	.
chr3L	10388651	10388652	.	.	.	.
chr3L	10804184	10804185	.	.	.	.
chr3L	10850425	10850426	.	.	.	.
chr3L	11112986	11112987	.	.	.	.
chr3L	11125332	11125333	.	.	.	.
chr3L	11128309	11128310	.	.	.	.
chr3L	11203690	11203691	.	.	.	.
chr3L	11672476	11672477	.	.	.	.
chr3L	12293170	12293171	.	.	.	.
chr3L	12329610	12329611	.	.	.	.
chr3L	12463668	12463669	.	.	.	.
chr3L	12507947	12507948	.	.	.	.
chr3L	12602884	12602885	.	.	.	.
chr3L	12690916	12690917	.	.	.	.
chr3L	12698587	12698588	.	.	.	.
chr3L	13025341	13025342	.	.	.	.
chr3L	13113592	13113593	.	.	.	.
chr3L	13221119	13221120	.	.	.	.
chr3L	13957847	13957848	.	.	.	.
chr3L	14044193	14044194	.	.	.	.
chr3L	14625246	14625247	.	.	.	.
chr3L	14625532	14625533	.	.	.	.
chr3L	15087895	15087896	.	.	.	.
chr3L	15168445	15168446	.	.	.	.
chr3L	15255520	15255521	.	.	.	.
chr3L	15323700	15323701	.	.	.	.
chr3L	15696708	15696709	.	.	.	.
chr3L	15976116	15976117	.	.	.	.
chr3L	16359654	16359655	.	.	.	.
chr3L	16577311	16577312	.	.	.	.
chr3L	16581569	16581570	.	.	.	.
chr3L	17469069	17469070	.	.	.	.
chr3L	17507223	17507224	.	.	.	.
chr3L	17527553	17527554	.	.	.	.
chr3L	19889586	19889587	.	.	.	.
chr3L	19890426	19890427	.	.	.	.
chr3L	19908083	19908084	.	.	.	.
chr3L	20369134	20369135	.	.	.	.
chr3L	20671721	20671722	.	.	.	.
chr3L	21018544	21018545	.	.	.	.
chr3L	21060642	21060643	CG32434-RC	.	.	.
chr3L	21426454	21426455	.	.	.	.
chr3L	21633945	21633946	.	.	.	.
chr3L	21721902	21721903	.	.	.	.
chr3L	22187451	22187452	.	.	.	.
chr3L	22396569	22396570	.	.	.	.
chr3L	22856967	22856968	.	.	.	.
chr2L	91988	91989	FlyExpress_net	.	.	.
chr2L	161192	161193	.	.	.	.
chr2L	161903	161904	.	.	.	.
chr2L	1076541	1076542	.	.	.	.
chr2L	1119150	1119151	.	.	.	.
chr2L	1366273	1366274	.	.	.	.
chr2L	1518058	1518059	.	.	.	.
chr2L	2164877	2164878	.	.	.	.
chr2L	2577170	2577171	.	.	.	.
chr2L	2885149	2885150	.	.	.	.
chr2L	3080598	3080599	.	.	.	.
chr2L	3566593	3566594	.	.	.	.
chr2L	3771884	3771885	.	.	.	.
chr2L	3862633	3862634	.	.	.	.
chr2L	4597833	4597834	.	.	.	.
chr2L	4811831	4811832	.	.	.	.
chr2L	5325211	5325212	.	.	.	.
chr2L	5877798	5877799	.	.	.	.
chr2L	6133520	6133521	.	.	.	.
chr2L	6134089	6134090	.	.	.	.
chr2L	6498531	6498532	.	.	.	.
chr2L	6967710	6967711	.	.	.	.
chr2L	6968000	6968001	.	.	.	.
chr2L	7306941	7306942	.	.	.	.
chr2L	7498389	7498390	.	.	.	.
chr2L	7799888	7799889	.	.	.	.
chr2L	8302970	8302971	.	.	.	.
chr2L	8511829	8511830	.	.	.	.
chr2L	8521989	8521990	.	.	.	.
chr2L	8675792	8675793	.	.	.	.
chr2L	8997547	8997548	.	.	.	.
chr2L	9758014	9758015	.	.	.	.
chr2L	10396347	10396348	.	.	.	.
chr2L	10396755	10396756	.	.	.	.
chr2L	10647830	10647831	.	.	.	.
chr2L	10732525	10732526	.	.	.	.
chr2L	10858131	10858132	.	.	.	.
chr2L	11269037	11269038	.	.	.	.
chr2L	12004013	12004014	.	.	.	.
chr2L	12436393	12436394	CG5442-RA	.	.	.
chr2L	13177020	13177021	.	.	.	.
chr2L	13245184	13245185	.	.	.	.
chr2L	13264032	13264033	.	.	.	.
chr2L	14261982	14261983	CG15288-RB	.	.	.
chr2L	14445881	14445882	.	.	.	.
chr2L	15038932	15038933	FlyExpress_Su(H)	.	.	.
chr2L	15039353	15039354	FlyExpress_Su(H)	.	.	.
chr2L	15324712	15324713	.	.	.	.
chr2L	15467909	15467910	.	.	.	.
chr2L	15485771	15485772	.	.	.	.
chr2L	16352728	16352729	.	.	.	.
chr2L	16491595	16491596	.	.	.	.
chr2L	16677148	16677149	.	.	.	.
chr2L	16679985	16679986	.	.	.	.
chr2L	16787755	16787756	.	.	.	.
chr2L	17830964	17830965	.	.	.	.
chr2L	18088121	18088122	.	.	.	.
chr2L	18358209	18358210	.	.	.	.
chr2L	18768320	18768321	.	.	.	.
chr2L	18808859	18808860	.	.	.	.
chr2L	19158746	19158747	.	.	.	.
chr2L	19219908	19219909	.	.	.	.
chr2L	19453563	19453564	.	.	.	.
chr2L	19475274	19475275	.	.	.	.
chr2L	19758719	19758720	.	.	.	.
chr2L	20350258	20350259	.	.	.	.
chr2L	20647512	20647513	.	.	.	.
chr2L	20676058	20676059	.	.	.	.
chr3R	604711	604712	.	.	.	.
chr3R	801358	801359	.	.	.	.
chr3R	869049	869050	.	.	.	.
chr3R	2176531	2176532	.	.	.	.
chr3R	2194114	2194115	.	.	.	.
chr3R	2206011	2206012	.	.	.	.
chr3R	2490335	2490336	.	.	.	.
chr3R	2738831	2738832	.	.	.	.
chr3R	2775097	2775098	.	.	.	.
chr3R	2863501	2863502	.	.	.	.
chr3R	2912513	2912514	.	.	.	.
chr3R	2919579	2919580	.	.	.	.
chr3R	3636040	3636041	.	.	.	.
chr3R	3733160	3733161	.	.	.	.
chr3R	4016830	4016831	.	.	.	.
chr3R	4059229	4059230	.	.	.	.
chr3R	4097825	4097826	.	.	.	.
chr3R	4303226	4303227	CG45263-RA	.	.	.
chr3R	4476588	4476589	.	.	.	.
chr3R	4573436	4573437	.	.	.	.
chr3R	4865231	4865232	.	.	.	.
chr3R	5031956	5031957	.	.	.	.
chr3R	5044135	5044136	.	.	.	.
chr3R	5412598	5412599	.	.	.	.
chr3R	5452838	5452839	.	.	.	.
chr3R	5463373	5463374	.	.	.	.
chr3R	5626847	5626848	.	.	.	.
chr3R	5715239	5715240	.	.	.	.
chr3R	6321797	6321798	.	.	.	.
chr3R	6347287	6347288	.	.	.	.
chr3R	6586851	6586852	.	.	.	.
chr3R	6610087	6610088	.	.	.	.
chr3R	7788677	7788678	.	.	.	.
chr3R	7954458	7954459	CG4702-RA	.	.	.
chr3R	8293681	8293682	CG31449-RA	.	.	.
chr3R	8930173	8930174	.	.	.	.
chr3R	9119414	9119415	.	.	.	.
chr3R	9263166	9263167	.	.	.	.
chr3R	9389127	9389128	.	.	.	.
chr3R	9735694	9735695	.	.	.	.
chr3R	10217180	10217181	.	.	.	.
chr3R	10247737	10247738	.	.	.	.
chr3R	10407362	10407363	.	.	.	.
chr3R	10450129	10450130	.	.	.	.
chr3R	10451787	10451788	.	.	.	.
chr3R	10481362	10481363	.	.	.	.
chr3R	10505427	10505428	.	.	.	.
chr3R	10643813	10643814	.	.	.	.
chr3R	11022233	11022234	.	.	.	.
chr3R	11034813	11034814	.	.	.	.
chr3R	11106611	11106612	CG4898-RB	.	.	.
chr3R	11299393	11299394	.	.	.	.
chr3R	11875374	11875375	.	.	.	.
chr3R	12267495	12267496	.	.	.	.
chr3R	12473275	12473276	.	.	.	.
chr3R	12575983	12575984	.	.	.	.
chr3R	12724494	12724495	.	.	.	.
chr3R	12759620	12759621	.	.	.	.
chr3R	12795538	12795539	.	.	.	.
chr3R	12854171	12854172	.	.	.	.
chr3R	12878576	12878577	.	.	.	.
chr3R	12880229	12880230	.	.	.	.
chr3R	12905263	12905264	.	.	.	.
chr3R	12977561	12977562	.	.	.	.
chr3R	13366028	13366029	.	.	.	.
chr3R	13429563	13429564	.	.	.	.
chr3R	13631033	13631034	.	.	.	.
chr3R	14982525	14982526	.	.	.	.
chr3R	14989790	14989791	.	.	.	.
chr3R	15625123	15625124	.	.	.	.
chr3R	15625727	15625728	.	.	.	.
chr3R	15690295	15690296	.	.	.	.
chr3R	16117666	16117667	.	.	.	.
chr3R	16774405	16774406	.	.	.	.
chr3R	16927858	16927859	.	.	.	.
chr3R	17199263	17199264	CG32491-RG	.	.	.
chr3R	17218822	17218823	.	.	.	.
chr3R	17220019	17220020	.	.	.	.
chr3R	17959714	17959715	.	.	.	.
chr3R	17960257	17960258	.	.	.	.
chr3R	18044716	18044717	.	.	.	.
chr3R	18516128	18516129	.	.	.	.
chr3R	18576508	18576509	.	.	.	.
chr3R	18615098	18615099	.	.	.	.
chr3R	18967708	18967709	.	.	.	.
chr3R	19203192	19203193	.	.	.	.
chr3R	19699748	19699749	.	.	.	.
chr3R	19757143	19757144	.	.	.	.
chr3R	19995387	19995388	.	.	.	.
chr3R	20159091	20159092	.	.	.	.
chr3R	20412362	20412363	.	.	.	.
chr3R	20639612	20639613	.	.	.	.
chr3R	20696320	20696321	.	.	.	.
chr3R	20804204	20804205	.	.	.	.
chr3R	21020626	21020627	CG13653-RA	CG13654-RA	.	.
chr3R	21841124	21841125	.	.	.	.
chr3R	21868052	21868053	CG8384-RA	.	.	.
chr3R	21868630	21868631	CG8384-RA	.	.	.
chr3R	21948327	21948328	.	.	.	.
chr3R	22708397	22708398	.	.	.	.
chr3R	23064849	23064850	CG31064-RA	.	.	.
chr3R	23106971	23106972	.	.	.	.
chr3R	23669730	23669731	.	.	.	.
chr3R	23811929	23811930	.	.	.	.
chr3R	23941902	23941903	.	.	.	.
chr3R	24457704	24457705	.	.	.	.
chr3R	24817791	24817792	.	.	.	.
chr3R	24938734	24938735	.	.	.	.
chr3R	25177429	25177430	.	.	.	.
chr3R	25283116	25283117	.	.	.	.
chr3R	25871314	25871315	.	.	.	.
chr3R	26581063	26581064	.	.	.	.
chr3R	26607524	26607525	.	.	.	.
chr3R	26738374	26738375	.	.	.	.
chr3R	27073824	27073825	.	.	.	.
chr3R	27526592	27526593	.	.	.	.
chr2R	1664031	1664032	.	.	.	.
chr2R	2460906	2460907	.	.	.	.
chr2R	2519892	2519893	.	.	.	.
chr2R	3027419	3027420	.	.	.	.
chr2R	4174753	4174754	.	.	.	.
chr2R	4794834	4794835	.	.	.	.
chr2R	5466468	5466469	.	.	.	.
chr2R	6356063	6356064	.	.	.	.
chr2R	6422852	6422853	CG12052-RA	.	.	.
chr2R	6731669	6731670	CG30015-RD	.	.	.
chr2R	7872908	7872909	.	.	.	.
chr2R	8027994	8027995	.	.	.	.
chr2R	8521088	8521089	.	.	.	.
chr2R	8664416	8664417	CG17579-RB	.	.	.
chr2R	8844027	8844028	.	.	.	.
chr2R	8873303	8873304	.	.	.	.
chr2R	8879182	8879183	.	.	.	.
chr2R	9046051	9046052	CG4007-RA	.	.	.
chr2R	9055443	9055444	.	.	.	.
chr2R	9076973	9076974	.	.	.	.
chr2R	9359644	9359645	.	.	.	.
chr2R	9448207	9448208	CG13333-RA	.	.	.
chr2R	9449139	9449140	.	.	.	.
chr2R	9450928	9450929	.	.	.	.
chr2R	9451313	9451314	.	.	.	.
chr2R	9452219	9452220	.	.	.	.
chr2R	9453851	9453852	.	.	.	.
chr2R	9454414	9454415	.	.	.	.
chr2R	9455002	9455003	.	.	.	.
chr2R	9456467	9456468	.	.	.	.
chr2R	9457795	9457796	.	.	.	.
chr2R	9741907	9741908	.	.	.	.
chr2R	10061749	10061750	.	.	.	.
chr2R	10062329	10062330	.	.	.	.
chr2R	10064420	10064421	.	.	.	.
chr2R	10158140	10158141	CG8547-RB	.	.	.
chr2R	10299285	10299286	.	.	.	.
chr2R	10391472	10391473	.	.	.	.
chr2R	10506289	10506290	.	.	.	.
chr2R	10639728	10639729	.	.	.	.
chr2R	10950240	10950241	.	.	.	.
chr2R	11209738	11209739	.	.	.	.
chr2R	11778476	11778477	.	.	.	.
chr2R	11785740	11785741	.	.	.	.
chr2R	11788189	11788190	.	.	.	.
chr2R	13030736	13030737	.	.	.	.
chr2R	13553220	13553221	.	.	.	.
chr2R	13683510	13683511	.	.	.	.
chr2R	13739162	13739163	.	.	.	.
chr2R	14047955	14047956	.	.	.	.
chr2R	14082204	14082205	.	.	.	.
chr2R	14098482	14098483	.	.	.	.
chr2R	14164866	14164867	.	.	.	.
chr2R	14453268	14453269	.	.	.	.
chr2R	14690275	14690276	FlyExpress_l(2)08717	.	.	.
chr2R	14734252	14734253	.	.	.	.
chr2R	14844604	14844605	.	.	.	.
chr2R	14947727	14947728	.	.	.	.
chr2R	15150183	15150184	.	.	.	.
chr2R	15518675	15518676	.	.	.	.
chr2R	15728374	15728375	.	.	.	.
chr2R	15994011	15994012	.	.	.	.
chr2R	16087639	16087640	.	.	.	.
chr2R	16490535	16490536	.	.	.	.
chr2R	16554970	16554971	.	.	.	.
chr2R	16555533	16555534	.	.	.	.
chr2R	16794951	16794952	.	.	.	.
chr2R	17368434	17368435	.	.	.	.
chr2R	17432976	17432977	CG10079-RB	.	.	.
chr2R	17433575	17433576	CG10079-RB	.	.	.
chr2R	17534148	17534149	.	.	.	.
chr2R	17578722	17578723	.	.	.	.
chr2R	18136246	18136247	.	.	.	.
chr2R	18576624	18576625	.	.	.	.
chr2R	18577388	18577389	.	.	.	.
chr2R	18690536	18690537	.	.	.	.
chr2R	18937305	18937306	.	.	.	.
chr2R	19105678	19105679	.	.	.	.
chr2R	19435556	19435557	.	.	.	.
chr2R	19866414	19866415	.	.	.	.
chr2R	19916423	19916424	.	.	.	.
chr2R	20585482	20585483	.	.	.	.
chr2R	20893720	20893721	.	.	.	.
chrX	413505	413506	.	.	.	.
chrX	484897	484898	.	.	.	.
chrX	510700	510701	.	.	.	.
chrX	981094	981095	.	.	.	.
chrX	1104078	1104079	.	.	.	.
chrX	1378278	1378279	.	.	.	.
chrX	1378784	1378785	.	.	.	.
chrX	1538304	1538305	.	.	.	.
chrX	1548972	1548973	.	.	.	.
chrX	1550627	1550628	.	.	.	.
chrX	1551815	1551816	.	.	.	.
chrX	1802230	1802231	.	.	.	.
chrX	2019750	2019751	.	.	.	.
chrX	2059839	2059840	.	.	.	.
chrX	2074954	2074955	.	.	.	.
chrX	2302818	2302819	.	.	.	.
chrX	2338006	2338007	.	.	.	.
chrX	3082003	3082004	.	.	.	.
chrX	3376808	3376809	.	.	.	.
chrX	3613940	3613941	.	.	.	.
chrX	3635007	3635008	.	.	.	.
chrX	3667163	3667164	.	.	.	.
chrX	4091362	4091363	.	.	.	.
chrX	4105354	4105355	.	.	.	.
chrX	4131823	4131824	.	.	.	.
chrX	4285092	4285093	.	.	.	.
chrX	4834546	4834547	.	.	.	.
chrX	5069200	5069201	.	.	.	.
chrX	5223552	5223553	.	.	.	.
chrX	5448283	5448284	.	.	.	.
chrX	5687687	5687688	.	.	.	.
chrX	5691871	5691872	.	.	.	.
chrX	5695132	5695133	.	.	.	.
chrX	5792861	5792862	.	.	.	.
chrX	5794691	5794692	.	.	.	.
chrX	5890843	5890844	.	.	.	.
chrX	6634179	6634180	.	.	.	.
chrX	6697722	6697723	.	.	.	.
chrX	6698240	6698241	.	.	.	.
chrX	6749997	6749998	.	.	.	.
chrX	7070076	7070077	.	.	.	.
chrX	7497958	7497959	.	.	.	.
chrX	7502099	7502100	CG11387-RA	.	.	.
chrX	7877427	7877428	.	.	.	.
chrX	7955508	7955509	CG2252-RC	.	.	.
chrX	8036288	8036289	.	.	.	.
chrX	8262732	8262733	.	.	.	.
chrX	8318666	8318667	.	.	.	.
chrX	8526607	8526608	.	.	.	.
chrX	8614434	8614435	.	.	.	.
chrX	8724058	8724059	.	.	.	.
chrX	8838071	8838072	.	.	.	.
chrX	9374014	9374015	.	.	.	.
chrX	9444788	9444789	.	.	.	.
chrX	9578725	9578726	.	.	.	.
chrX	9579800	9579801	.	.	.	.
chrX	9638116	9638117	.	.	.	.
chrX	9685398	9685399	.	.	.	.
chrX	10367140	10367141	.	.	.	.
chrX	10639090	10639091	.	.	.	.
chrX	10696242	10696243	.	.	.	.
chrX	11458081	11458082	.	.	.	.
chrX	11610745	11610746	.	.	.	.
chrX	11728859	11728860	.	.	.	.
chrX	12309727	12309728	.	.	.	.
chrX	12526345	12526346	.	.	.	.
chrX	12528112	12528113	.	.	.	.
chrX	12832367	12832368	CG4396-RA	.	.	.
chrX	13190962	13190963	.	.	.	.
chrX	13703043	13703044	.	.	.	.
chrX	13713564	13713565	.	.	.	.
chrX	14374203	14374204	.	.	.	.
chrX	14432703	14432704	.	.	.	.
chrX	14859988	14859989	.	.	.	.
chrX	15213463	15213464	.	.	.	.
chrX	15468634	15468635	.	.	.	.
chrX	15606607	15606608	.	.	.	.
chrX	15628177	15628178	.	.	.	.
chrX	15988240	15988241	.	.	.	.
chrX	16056046	16056047	.	.	.	.
chrX	16135998	16135999	.	.	.	.
chrX	16214680	16214681	.	.	.	.
chrX	16393563	16393564	.	.	.	.
chrX	16492925	16492926	.	.	.	.
chrX	16669520	16669521	.	.	.	.
chrX	17227038	17227039	.	.	.	.
chrX	17380042	17380043	.	.	.	.
chrX	17645353	17645354	.	.	.	.
chrX	17877197	17877198	.	.	.	.
chrX	18165126	18165127	.	.	.	.
chrX	18193364	18193365	.	.	.	.
chrX	18264886	18264887	.	.	.	.
chrX	18535718	18535719	.	.	.	.
chrX	19659429	19659430	.	.	.	.
chrX	20122348	20122349	.	.	.	.
chrX	20265390	20265391	.	.	.	.
chrX	21075266	21075267	.	.	.	.
chrX	21239637	21239638	.	.	.	.
chrX	21317798	21317799	.	.	.	.
chrX	21857508	21857509	.	.	.	.
chrX	21863178	21863179	.	.	.	.

## Sheet: 5kb_Peak_to_Gene
#feature.id	chr_1	start_1	end_1	dist_closest_1	chr_2	start_2	end_2	dist_closest_2	chr_3	start_3	end_3	dist_closest_3	chr_4	start_4	end_4	dist_closest_4
CG8827-RA	chr2L	13905227	13905228	417	.	.	.	.	.	.	.	.	.	.	.	.
CG33466-RA	.	.	.	.	.	.	.	.	.	.	.	.	.	.	.	.
CG16869-RA	chr2L	13905227	13905228	4412	.	.	.	.	.	.	.	.	.	.	.	.
CG3218-RA	.	.	.	.	.	.	.	.	.	.	.	.	.	.	.	.
CG8649-RD	.	.	.	.	.	.	.	.	.	.	.	.	.	.	.	.
CG1944-RA	.	.	.	.	.	.	.	.	.	.	.	.	.	.	.	.
CG1048-RA	.	.	.	.	.	.	.	.	.	.	.	.	.	.	.	.
CG13653-RA	chr3R	21021124	21021125	157	chr3R	21020626	21020627	655	.	.	.	.	.	.	.	.
CG5055-RB	.	.	.	.	.	.	.	.	.	.	.	.	.	.	.	.
CG12283-RA	.	.	.	.	.	.	.	.	.	.	.	.	.	.	.	.
CG7997-RB	.	.	.	.	.	.	.	.	.	.	.	.	.	.	.	.
CG8095-RB	.	.	.	.	.	.	.	.	.	.	.	.	.	.	.	.
CG2762-RA	chr2L	523080	523081	386	chr2L	518626	518627	4840	.	.	.	.	.	.	.	.
CG18088-RA	.	.	.	.	.	.	.	.	.	.	.	.	.	.	.	.
CG5187-RA	chr3L	9012699	9012700	358	chr3L	9013891	9013892	1550	chr3L	9010275	9010276	0	.	.	.	.
CG9520-RA	.	.	.	.	.	.	.	.	.	.	.	.	.	.	.	.
CG12011-RA	.	.	.	.	.	.	.	.	.	.	.	.	.	.	.	.
CG13800-RA	chr3L	2385879	2385880	2512	.	.	.	.	.	.	.	.	.	.	.	.
CG10619-RB	.	.	.	.	.	.	.	.	.	.	.	.	.	.	.	.
CG31902-RB	.	.	.	.	.	.	.	.	.	.	.	.	.	.	.	.
CG12919-RA	chr2R	5965706	5965707	163	chr2R	5964776	5964777	1093	.	.	.	.	.	.	.	.
CG5399-RA	.	.	.	.	.	.	.	.	.	.	.	.	.	.	.	.
CG8084-RA	chr2R	4958868	4958869	0	chr2R	4959563	4959564	0	.	.	.	.	.	.	.	.
CG11893-RA	.	.	.	.	.	.	.	.	.	.	.	.	.	.	.	.
CG45263-RA	chr3R	4303226	4303227	0	.	.	.	.	.	.	.	.	.	.	.	.
CG13912-RA	.	.	.	.	.	.	.	.	.	.	.	.	.	.	.	.
CG33956-RD	chr3R	25590063	25590064	2433	chr3R	25596904	25596905	0	.	.	.	.	.	.	.	.
CG6394-RA	.	.	.	.	.	.	.	.	.	.	.	.	.	.	.	.
CG9446-RB	.	.	.	.	.	.	.	.	.	.	.	.	.	.	.	.
CG1046-RA	chr3R	2580238	2580239	316	.	.	.	.	.	.	.	.	.	.	.	.
CG17574-RD	.	.	.	.	.	.	.	.	.	.	.	.	.	.	.	.
CG2947-RB	.	.	.	.	.	.	.	.	.	.	.	.	.	.	.	.
CG15236-RB	.	.	.	.	.	.	.	.	.	.	.	.	.	.	.	.
CG7530-RC	.	.	.	.	.	.	.	.	.	.	.	.	.	.	.	.
CG42666-RC	.	.	.	.	.	.	.	.	.	.	.	.	.	.	.	.
CG7005-RA	.	.	.	.	.	.	.	.	.	.	.	.	.	.	.	.
CG4193-RA	.	.	.	.	.	.	.	.	.	.	.	.	.	.	.	.
CG34373-RG	chr3L	8068112	8068113	2379	chr3L	8072913	8072914	0	.	.	.	.	.	.	.	.
CG16778-RC	.	.	.	.	.	.	.	.	.	.	.	.	.	.	.	.
CG3940-RA	.	.	.	.	.	.	.	.	.	.	.	.	.	.	.	.
CG15671-RA	.	.	.	.	.	.	.	.	.	.	.	.	.	.	.	.
CG43332-RA	.	.	.	.	.	.	.	.	.	.	.	.	.	.	.	.
CG6234-RA	chr3R	8472086	8472087	1695	chr3R	8471765	8471766	2016	chr3R	8471139	8471140	2642	.	.	.	.
CG7590-RA	.	.	.	.	.	.	.	.	.	.	.	.	.	.	.	.
CG12212-RA	.	.	.	.	.	.	.	.	.	.	.	.	.	.	.	.
CG31449-RA	chr3R	8293681	8293682	180	.	.	.	.	.	.	.	.	.	.	.	.
CG5133-RA	chr3L	9034632	9034633	0	chr3L	9034243	9034244	233	chr3L	9033834	9033835	642	chr3L	9035479	9035480	0
CG5661-RA	.	.	.	.	.	.	.	.	.	.	.	.	.	.	.	.
CG42365-RA	.	.	.	.	.	.	.	.	.	.	.	.	.	.	.	.
CG31641-RC	.	.	.	.	.	.	.	.	.	.	.	.	.	.	.	.
CG30463-RC	.	.	.	.	.	.	.	.	.	.	.	.	.	.	.	.
CG8974-RA	.	.	.	.	.	.	.	.	.	.	.	.	.	.	.	.
CG5442-RA	chr2L	12436393	12436394	1733	.	.	.	.	.	.	.	.	.	.	.	.
CG5093-RA	chr3L	8998185	8998186	112	chr3L	8996581	8996582	1716	.	.	.	.	.	.	.	.
CG17524-RA	.	.	.	.	.	.	.	.	.	.	.	.	.	.	.	.
CG31462-RA	.	.	.	.	.	.	.	.	.	.	.	.	.	.	.	.
CG2674-RG	.	.	.	.	.	.	.	.	.	.	.	.	.	.	.	.
CG44774-RA	.	.	.	.	.	.	.	.	.	.	.	.	.	.	.	.
CG13654-RA	chr3R	21021124	21021125	4415	chr3R	21020626	21020627	4913	.	.	.	.	.	.	.	.
CG3206-RA	.	.	.	.	.	.	.	.	.	.	.	.	.	.	.	.
CG15162-RA	.	.	.	.	.	.	.	.	.	.	.	.	.	.	.	.
CG33300-RA	.	.	.	.	.	.	.	.	.	.	.	.	.	.	.	.
CG5014-RC	.	.	.	.	.	.	.	.	.	.	.	.	.	.	.	.
CG6753-RA	chr3R	8471139	8471140	2843	chr3R	8471765	8471766	3469	chr3R	8472086	8472087	3790	.	.	.	.
CG1916-RA	chr2R	5378382	5378383	3291	.	.	.	.	.	.	.	.	.	.	.	.
CG4421-RA	.	.	.	.	.	.	.	.	.	.	.	.	.	.	.	.
CG8448-RC	.	.	.	.	.	.	.	.	.	.	.	.	.	.	.	.
CG7995-RD	.	.	.	.	.	.	.	.	.	.	.	.	.	.	.	.
CG11164-RA	chrX	13564833	13564834	1513	.	.	.	.	.	.	.	.	.	.	.	.
CG31760-RA	.	.	.	.	.	.	.	.	.	.	.	.	.	.	.	.
CG10082-RB	chr2R	17536634	17536635	4509	.	.	.	.	.	.	.	.	.	.	.	.
CG3664-RF	.	.	.	.	.	.	.	.	.	.	.	.	.	.	.	.
CG2269-RC	.	.	.	.	.	.	.	.	.	.	.	.	.	.	.	.
CG10626-RA	.	.	.	.	.	.	.	.	.	.	.	.	.	.	.	.
CG4408-RA	.	.	.	.	.	.	.	.	.	.	.	.	.	.	.	.
CG9339-RE	.	.	.	.	.	.	.	.	.	.	.	.	.	.	.	.
CG42329-RA	.	.	.	.	.	.	.	.	.	.	.	.	.	.	.	.
CG9734-RC	.	.	.	.	.	.	.	.	.	.	.	.	.	.	.	.
CG7272-RA	.	.	.	.	.	.	.	.	.	.	.	.	.	.	.	.
CG31064-RA	chr3R	23064849	23064850	49	.	.	.	.	.	.	.	.	.	.	.	.
CG10360-RB	.	.	.	.	.	.	.	.	.	.	.	.	.	.	.	.
CG15817-RA	.	.	.	.	.	.	.	.	.	.	.	.	.	.	.	.
CG3798-RA	.	.	.	.	.	.	.	.	.	.	.	.	.	.	.	.
CG32021-RA	.	.	.	.	.	.	.	.	.	.	.	.	.	.	.	.
CG1389-RA	.	.	.	.	.	.	.	.	.	.	.	.	.	.	.	.
CG8849-RA	.	.	.	.	.	.	.	.	.	.	.	.	.	.	.	.
CG30382-RA	.	.	.	.	.	.	.	.	.	.	.	.	.	.	.	.
CG14545-RA	.	.	.	.	.	.	.	.	.	.	.	.	.	.	.	.
CG33156-RB	.	.	.	.	.	.	.	.	.	.	.	.	.	.	.	.
CG5272-RA	.	.	.	.	.	.	.	.	.	.	.	.	.	.	.	.
CG3752-RA	.	.	.	.	.	.	.	.	.	.	.	.	.	.	.	.
CG9674-RD	.	.	.	.	.	.	.	.	.	.	.	.	.	.	.	.
CG13610-RA	chr3R	20098396	20098397	356	.	.	.	.	.	.	.	.	.	.	.	.
CG5099-RB	.	.	.	.	.	.	.	.	.	.	.	.	.	.	.	.
CG8632-RA	.	.	.	.	.	.	.	.	.	.	.	.	.	.	.	.
CG7937-RA	.	.	.	.	.	.	.	.	.	.	.	.	.	.	.	.
CG8524-RB	.	.	.	.	.	.	.	.	.	.	.	.	.	.	.	.
CG3429-RA	.	.	.	.	.	.	.	.	.	.	.	.	.	.	.	.
CG32581-RB	.	.	.	.	.	.	.	.	.	.	.	.	.	.	.	.
CG4302-RA	.	.	.	.	.	.	.	.	.	.	.	.	.	.	.	.
CG8385-RH	.	.	.	.	.	.	.	.	.	.	.	.	.	.	.	.
CG15658-RA	.	.	.	.	.	.	.	.	.	.	.	.	.	.	.	.
CG10184-RA	.	.	.	.	.	.	.	.	.	.	.	.	.	.	.	.
CG32697-RA	.	.	.	.	.	.	.	.	.	.	.	.	.	.	.	.
CG6721-RA	chr3L	9848010	9848011	0	chr3L	9849000	9849001	620	.	.	.	.	.	.	.	.
CG10072-RA	.	.	.	.	.	.	.	.	.	.	.	.	.	.	.	.
CG4404-RA	.	.	.	.	.	.	.	.	.	.	.	.	.	.	.	.
CG7660-RB	.	.	.	.	.	.	.	.	.	.	.	.	.	.	.	.
CG10236-RA	.	.	.	.	.	.	.	.	.	.	.	.	.	.	.	.
CG5888-RA	.	.	.	.	.	.	.	.	.	.	.	.	.	.	.	.
CG16983-RF	.	.	.	.	.	.	.	.	.	.	.	.	.	.	.	.
CG5481-RA	chr2L	1420247	1420248	0	.	.	.	.	.	.	.	.	.	.	.	.
CG32434-RC	chr3L	21060642	21060643	345	.	.	.	.	.	.	.	.	.	.	.	.
CG2125-RA	.	.	.	.	.	.	.	.	.	.	.	.	.	.	.	.
CG17941-RA	.	.	.	.	.	.	.	.	.	.	.	.	.	.	.	.
CG8495-RC	.	.	.	.	.	.	.	.	.	.	.	.	.	.	.	.
CG34214-RA	.	.	.	.	.	.	.	.	.	.	.	.	.	.	.	.
CG12369-RB	.	.	.	.	.	.	.	.	.	.	.	.	.	.	.	.
CG9075-RB	.	.	.	.	.	.	.	.	.	.	.	.	.	.	.	.
CG3938-RB	chr2L	15732174	15732175	394	.	.	.	.	.	.	.	.	.	.	.	.
CG12028-RA	.	.	.	.	.	.	.	.	.	.	.	.	.	.	.	.
CG11849-RA	.	.	.	.	.	.	.	.	.	.	.	.	.	.	.	.
CG17348-RA	.	.	.	.	.	.	.	.	.	.	.	.	.	.	.	.
CG18412-RA	.	.	.	.	.	.	.	.	.	.	.	.	.	.	.	.
CG7649-RB	.	.	.	.	.	.	.	.	.	.	.	.	.	.	.	.
CG13333-RA	chr2R	9448207	9448208	3359	.	.	.	.	.	.	.	.	.	.	.	.
CG3423-RA	.	.	.	.	.	.	.	.	.	.	.	.	.	.	.	.
CG14025-RC	.	.	.	.	.	.	.	.	.	.	.	.	.	.	.	.
CG15010-RA	chr3L	4252359	4252360	239	chr3L	4253025	4253026	905	.	.	.	.	.	.	.	.
CG3048-RA	.	.	.	.	.	.	.	.	.	.	.	.	.	.	.	.
CG34137-RA	.	.	.	.	.	.	.	.	.	.	.	.	.	.	.	.
CG3166-RB	.	.	.	.	.	.	.	.	.	.	.	.	.	.	.	.
CG1691-RF	chrX	10716877	10716878	67	.	.	.	.	.	.	.	.	.	.	.	.
CG15288-RB	chr2L	14261982	14261983	1539	.	.	.	.	.	.	.	.	.	.	.	.
CG33232-RC	.	.	.	.	.	.	.	.	.	.	.	.	.	.	.	.
CG6868-RA	.	.	.	.	.	.	.	.	.	.	.	.	.	.	.	.
CG4922-RA	.	.	.	.	.	.	.	.	.	.	.	.	.	.	.	.
CG3779-RA	chr2L	9449326	9449327	503	.	.	.	.	.	.	.	.	.	.	.	.
CG31531-RB	.	.	.	.	.	.	.	.	.	.	.	.	.	.	.	.
CG7271-RA	.	.	.	.	.	.	.	.	.	.	.	.	.	.	.	.
CG34383-RC	.	.	.	.	.	.	.	.	.	.	.	.	.	.	.	.
CG9775-RC	.	.	.	.	.	.	.	.	.	.	.	.	.	.	.	.
CG3322-RA	.	.	.	.	.	.	.	.	.	.	.	.	.	.	.	.
CG31607-RA	.	.	.	.	.	.	.	.	.	.	.	.	.	.	.	.
CG18255-RD	.	.	.	.	.	.	.	.	.	.	.	.	.	.	.	.
CG10293-RC	.	.	.	.	.	.	.	.	.	.	.	.	.	.	.	.
CG10079-RB	chr2R	17433575	17433576	1498	chr2R	17432976	17432977	2097	.	.	.	.	.	.	.	.
CG12082-RA	.	.	.	.	.	.	.	.	.	.	.	.	.	.	.	.
CG4216-RA	.	.	.	.	.	.	.	.	.	.	.	.	.	.	.	.
CG11851-RA	.	.	.	.	.	.	.	.	.	.	.	.	.	.	.	.
CG18111-RA	.	.	.	.	.	.	.	.	.	.	.	.	.	.	.	.
CG42278-RC	.	.	.	.	.	.	.	.	.	.	.	.	.	.	.	.
CG2252-RC	chrX	7955508	7955509	38	.	.	.	.	.	.	.	.	.	.	.	.
CG31317-RA	.	.	.	.	.	.	.	.	.	.	.	.	.	.	.	.
CG11988-RA	chr3R	4856038	4856039	0	.	.	.	.	.	.	.	.	.	.	.	.
CG8434-RA	chr2R	12047621	12047622	4230	.	.	.	.	.	.	.	.	.	.	.	.
CG7540-RA	.	.	.	.	.	.	.	.	.	.	.	.	.	.	.	.
CG14080-RB	.	.	.	.	.	.	.	.	.	.	.	.	.	.	.	.
CG3424-RA	.	.	.	.	.	.	.	.	.	.	.	.	.	.	.	.
CG33196-RC	.	.	.	.	.	.	.	.	.	.	.	.	.	.	.	.
CG14985-RB	.	.	.	.	.	.	.	.	.	.	.	.	.	.	.	.
CG30023-RA	.	.	.	.	.	.	.	.	.	.	.	.	.	.	.	.
CG13651-RA	.	.	.	.	.	.	.	.	.	.	.	.	.	.	.	.
CG3502-RB	.	.	.	.	.	.	.	.	.	.	.	.	.	.	.	.
CG32227-RA	.	.	.	.	.	.	.	.	.	.	.	.	.	.	.	.
CG7250-RA	.	.	.	.	.	.	.	.	.	.	.	.	.	.	.	.
CG8654-RA	.	.	.	.	.	.	.	.	.	.	.	.	.	.	.	.
CG30015-RD	chr2R	6731669	6731670	140	.	.	.	.	.	.	.	.	.	.	.	.
CG33868-RA	.	.	.	.	.	.	.	.	.	.	.	.	.	.	.	.
CG13425-RB	.	.	.	.	.	.	.	.	.	.	.	.	.	.	.	.
CG8384-RA	chr3R	21868052	21868053	0	chr3R	21868630	21868631	0	.	.	.	.	.	.	.	.
CG11949-RA	.	.	.	.	.	.	.	.	.	.	.	.	.	.	.	.
CG14938-RD	chr2L	11807159	11807160	0	.	.	.	.	.	.	.	.	.	.	.	.
CG3937-RB	.	.	.	.	.	.	.	.	.	.	.	.	.	.	.	.
CG32062-RG	.	.	.	.	.	.	.	.	.	.	.	.	.	.	.	.
CG6885-RA	.	.	.	.	.	.	.	.	.	.	.	.	.	.	.	.
CG9623-RB	.	.	.	.	.	.	.	.	.	.	.	.	.	.	.	.
CG4702-RA	chr3R	7954458	7954459	538	.	.	.	.	.	.	.	.	.	.	.	.
CG17579-RB	chr2R	8664416	8664417	3632	.	.	.	.	.	.	.	.	.	.	.	.
CG17894-RB	.	.	.	.	.	.	.	.	.	.	.	.	.	.	.	.
CG2028-RC	chrX	12548561	12548562	211	.	.	.	.	.	.	.	.	.	.	.	.
CG9326-RC	.	.	.	.	.	.	.	.	.	.	.	.	.	.	.	.
CG17117-RE	chr3R	6469293	6469294	4906	.	.	.	.	.	.	.	.	.	.	.	.
CG17510-RA	.	.	.	.	.	.	.	.	.	.	.	.	.	.	.	.
CG8595-RA	.	.	.	.	.	.	.	.	.	.	.	.	.	.	.	.
CG31721-RA	.	.	.	.	.	.	.	.	.	.	.	.	.	.	.	.
CG1374-RA	.	.	.	.	.	.	.	.	.	.	.	.	.	.	.	.
CG12908-RA	.	.	.	.	.	.	.	.	.	.	.	.	.	.	.	.
CG1915-RC	.	.	.	.	.	.	.	.	.	.	.	.	.	.	.	.
CG2986-RE	.	.	.	.	.	.	.	.	.	.	.	.	.	.	.	.
CG17131-RB	.	.	.	.	.	.	.	.	.	.	.	.	.	.	.	.
CG10112-RA	.	.	.	.	.	.	.	.	.	.	.	.	.	.	.	.
CG5080-RB	.	.	.	.	.	.	.	.	.	.	.	.	.	.	.	.
CG10287-RA	.	.	.	.	.	.	.	.	.	.	.	.	.	.	.	.
CG7884-RA	.	.	.	.	.	.	.	.	.	.	.	.	.	.	.	.
CG3851-RA	.	.	.	.	.	.	.	.	.	.	.	.	.	.	.	.
CG30080-RA	.	.	.	.	.	.	.	.	.	.	.	.	.	.	.	.
CG3625-RB	.	.	.	.	.	.	.	.	.	.	.	.	.	.	.	.
CG1897-RA	.	.	.	.	.	.	.	.	.	.	.	.	.	.	.	.
CG3388-RA	chr2R	20944710	20944711	4792	.	.	.	.	.	.	.	.	.	.	.	.
CG32019-RE	.	.	.	.	.	.	.	.	.	.	.	.	.	.	.	.
CG5899-RB	.	.	.	.	.	.	.	.	.	.	.	.	.	.	.	.
CG12052-RA	chr2R	6422852	6422853	317	.	.	.	.	.	.	.	.	.	.	.	.
CG10521-RA	chrX	14643192	14643193	0	chrX	14642747	14642748	0	.	.	.	.	.	.	.	.
CG10067-RA	.	.	.	.	.	.	.	.	.	.	.	.	.	.	.	.
CG5779-RA	.	.	.	.	.	.	.	.	.	.	.	.	.	.	.	.
CG31020-RA	.	.	.	.	.	.	.	.	.	.	.	.	.	.	.	.
CG11527-RA	.	.	.	.	.	.	.	.	.	.	.	.	.	.	.	.
CG12653-RA	.	.	.	.	.	.	.	.	.	.	.	.	.	.	.	.
CG8799-RA	.	.	.	.	.	.	.	.	.	.	.	.	.	.	.	.
CG34379-RD	.	.	.	.	.	.	.	.	.	.	.	.	.	.	.	.
CG1056-RB	.	.	.	.	.	.	.	.	.	.	.	.	.	.	.	.
CG12443-RA	.	.	.	.	.	.	.	.	.	.	.	.	.	.	.	.
CG31666-RD	.	.	.	.	.	.	.	.	.	.	.	.	.	.	.	.
CG2264-RB	chr2R	5943941	5943942	394	chr2R	5945423	5945424	0	chr2R	5943172	5943173	1163	.	.	.	.
CG12296-RA	chr3L	11003521	11003522	1601	.	.	.	.	.	.	.	.	.	.	.	.
CG1934-RA	.	.	.	.	.	.	.	.	.	.	.	.	.	.	.	.
CG4158-RA	.	.	.	.	.	.	.	.	.	.	.	.	.	.	.	.
CG11069-RA	.	.	.	.	.	.	.	.	.	.	.	.	.	.	.	.
CG4898-RB	chr3R	11106611	11106612	642	.	.	.	.	.	.	.	.	.	.	.	.
CG18024-RA	chr2L	8825446	8825447	178	.	.	.	.	.	.	.	.	.	.	.	.
CG17046-RC	.	.	.	.	.	.	.	.	.	.	.	.	.	.	.	.
CG9689-RA	.	.	.	.	.	.	.	.	.	.	.	.	.	.	.	.
CG33103-RC	.	.	.	.	.	.	.	.	.	.	.	.	.	.	.	.
CG3401-RA	.	.	.	.	.	.	.	.	.	.	.	.	.	.	.	.
CG1244-RB	.	.	.	.	.	.	.	.	.	.	.	.	.	.	.	.
CG12063-RA	.	.	.	.	.	.	.	.	.	.	.	.	.	.	.	.
CG9628-RB	.	.	.	.	.	.	.	.	.	.	.	.	.	.	.	.
CG10717-RA	chr3L	13371495	13371496	4371	.	.	.	.	.	.	.	.	.	.	.	.
CG31045-RF	.	.	.	.	.	.	.	.	.	.	.	.	.	.	.	.
CG9653-RA	chrX	7201745	7201746	228	chrX	7200186	7200187	1787	.	.	.	.	.	.	.	.
CG10325-RA	.	.	.	.	.	.	.	.	.	.	.	.	.	.	.	.
CG9073-RA	.	.	.	.	.	.	.	.	.	.	.	.	.	.	.	.
CG33555-RG	.	.	.	.	.	.	.	.	.	.	.	.	.	.	.	.
CG4844-RA	.	.	.	.	.	.	.	.	.	.	.	.	.	.	.	.
CG10037-RA	.	.	.	.	.	.	.	.	.	.	.	.	.	.	.	.
CG6634-RA	chr2L	5461641	5461642	0	chr2L	5461323	5461324	317	chr2L	5458760	5458761	2880	.	.	.	.
CG3254-RA	.	.	.	.	.	.	.	.	.	.	.	.	.	.	.	.
CG2184-RB	.	.	.	.	.	.	.	.	.	.	.	.	.	.	.	.
CG4007-RA	chr2R	9046051	9046052	1191	.	.	.	.	.	.	.	.	.	.	.	.
CG9224-RA	.	.	.	.	.	.	.	.	.	.	.	.	.	.	.	.
CG33183-RA	.	.	.	.	.	.	.	.	.	.	.	.	.	.	.	.
CG10719-RC	.	.	.	.	.	.	.	.	.	.	.	.	.	.	.	.
CG2049-RG	.	.	.	.	.	.	.	.	.	.	.	.	.	.	.	.
CG11895-RA	.	.	.	.	.	.	.	.	.	.	.	.	.	.	.	.
CG7178-RA	.	.	.	.	.	.	.	.	.	.	.	.	.	.	.	.
CG2330-RA	.	.	.	.	.	.	.	.	.	.	.	.	.	.	.	.
CG1856-RA	.	.	.	.	.	.	.	.	.	.	.	.	.	.	.	.
CG11387-RA	chrX	7502099	7502100	1081	.	.	.	.	.	.	.	.	.	.	.	.
CG18290-RA	.	.	.	.	.	.	.	.	.	.	.	.	.	.	.	.
CG14351-RA	.	.	.	.	.	.	.	.	.	.	.	.	.	.	.	.
CG15098-RA	.	.	.	.	.	.	.	.	.	.	.	.	.	.	.	.
CG9491-RC	chr2L	6323901	6323902	0	.	.	.	.	.	.	.	.	.	.	.	.
CG13194-RB	chr2R	7604164	7604165	0	.	.	.	.	.	.	.	.	.	.	.	.
CG3108-RA	.	.	.	.	.	.	.	.	.	.	.	.	.	.	.	.
CG12311-RA	.	.	.	.	.	.	.	.	.	.	.	.	.	.	.	.
CG13920-RA	.	.	.	.	.	.	.	.	.	.	.	.	.	.	.	.
CG17228-RF	chr3R	7198188	7198189	0	chr3R	7198573	7198574	0	.	.	.	.	.	.	.	.
CG4396-RA	chrX	12832367	12832368	233	.	.	.	.	.	.	.	.	.	.	.	.
CG31300-RA	.	.	.	.	.	.	.	.	.	.	.	.	.	.	.	.
CG1151-RA	.	.	.	.	.	.	.	.	.	.	.	.	.	.	.	.
CG7756-RA	.	.	.	.	.	.	.	.	.	.	.	.	.	.	.	.
CG5191-RC	.	.	.	.	.	.	.	.	.	.	.	.	.	.	.	.
CG1153-RA	.	.	.	.	.	.	.	.	.	.	.	.	.	.	.	.
CG17420-RD	.	.	.	.	.	.	.	.	.	.	.	.	.	.	.	.
CG7675-RA	.	.	.	.	.	.	.	.	.	.	.	.	.	.	.	.
CG8193-RA	.	.	.	.	.	.	.	.	.	.	.	.	.	.	.	.
CG1130-RA	.	.	.	.	.	.	.	.	.	.	.	.	.	.	.	.
CG12172-RA	.	.	.	.	.	.	.	.	.	.	.	.	.	.	.	.
CG8376-RA	.	.	.	.	.	.	.	.	.	.	.	.	.	.	.	.
CG5596-RB	.	.	.	.	.	.	.	.	.	.	.	.	.	.	.	.
CG15282-RA	.	.	.	.	.	.	.	.	.	.	.	.	.	.	.	.
CG32491-RG	chr3R	17199263	17199264	0	.	.	.	.	.	.	.	.	.	.	.	.
CG9611-RE	.	.	.	.	.	.	.	.	.	.	.	.	.	.	.	.
CG17927-RD	.	.	.	.	.	.	.	.	.	.	.	.	.	.	.	.
CG2666-RB	.	.	.	.	.	.	.	.	.	.	.	.	.	.	.	.
CG32209-RB	.	.	.	.	.	.	.	.	.	.	.	.	.	.	.	.
CG18507-RB	.	.	.	.	.	.	.	.	.	.	.	.	.	.	.	.
CG7225-RA	.	.	.	.	.	.	.	.	.	.	.	.	.	.	.	.
CG13906-RA	.	.	.	.	.	.	.	.	.	.	.	.	.	.	.	.
CG6883-RA	chr3L	378266	378267	949	.	.	.	.	.	.	.	.	.	.	.	.
CG34416-RN	.	.	.	.	.	.	.	.	.	.	.	.	.	.	.	.
CG30413-RA	.	.	.	.	.	.	.	.	.	.	.	.	.	.	.	.
CG18783-RB	chr2L	6088479	6088480	2937	.	.	.	.	.	.	.	.	.	.	.	.
CG14470-RA	.	.	.	.	.	.	.	.	.	.	.	.	.	.	.	.
CG31813-RA	.	.	.	.	.	.	.	.	.	.	.	.	.	.	.	.
CG12210-RA	.	.	.	.	.	.	.	.	.	.	.	.	.	.	.	.
CG11049-RG	.	.	.	.	.	.	.	.	.	.	.	.	.	.	.	.
CG4467-RA	.	.	.	.	.	.	.	.	.	.	.	.	.	.	.	.
CG9660-RE	.	.	.	.	.	.	.	.	.	.	.	.	.	.	.	.
CG10382-RA	.	.	.	.	.	.	.	.	.	.	.	.	.	.	.	.
CG32150-RA	.	.	.	.	.	.	.	.	.	.	.	.	.	.	.	.
CG7526-RC	.	.	.	.	.	.	.	.	.	.	.	.	.	.	.	.
CG8587-RA	.	.	.	.	.	.	.	.	.	.	.	.	.	.	.	.
CG1342-RA	.	.	.	.	.	.	.	.	.	.	.	.	.	.	.	.
CG10591-RA	chr3L	5597381	5597382	4591	.	.	.	.	.	.	.	.	.	.	.	.
CG1157-RA	.	.	.	.	.	.	.	.	.	.	.	.	.	.	.	.
CG33715-RB	.	.	.	.	.	.	.	.	.	.	.	.	.	.	.	.
CG9614-RM	.	.	.	.	.	.	.	.	.	.	.	.	.	.	.	.
CG7816-RD	.	.	.	.	.	.	.	.	.	.	.	.	.	.	.	.
CG7283-RC	.	.	.	.	.	.	.	.	.	.	.	.	.	.	.	.
CG42684-RD	.	.	.	.	.	.	.	.	.	.	.	.	.	.	.	.
CG40263-RA	.	.	.	.	.	.	.	.	.	.	.	.	.	.	.	.
CG6024-RD	.	.	.	.	.	.	.	.	.	.	.	.	.	.	.	.
CG8493-RB	.	.	.	.	.	.	.	.	.	.	.	.	.	.	.	.
CG14253-RB	.	.	.	.	.	.	.	.	.	.	.	.	.	.	.	.
CG13377-RA	.	.	.	.	.	.	.	.	.	.	.	.	.	.	.	.
CG6611-RC	.	.	.	.	.	.	.	.	.	.	.	.	.	.	.	.
CG7847-RB	.	.	.	.	.	.	.	.	.	.	.	.	.	.	.	.
CG9828-RB	.	.	.	.	.	.	.	.	.	.	.	.	.	.	.	.
CG15013-RA	.	.	.	.	.	.	.	.	.	.	.	.	.	.	.	.
CG9184-RA	.	.	.	.	.	.	.	.	.	.	.	.	.	.	.	.
CG6434-RA	.	.	.	.	.	.	.	.	.	.	.	.	.	.	.	.
CG31997-RA	.	.	.	.	.	.	.	.	.	.	.	.	.	.	.	.
CG13159-RA	.	.	.	.	.	.	.	.	.	.	.	.	.	.	.	.
CG32031-RC	.	.	.	.	.	.	.	.	.	.	.	.	.	.	.	.
CG8547-RB	chr2R	10158140	10158141	3020	.	.	.	.	.	.	.	.	.	.	.	.
CG15822-RB	.	.	.	.	.	.	.	.	.	.	.	.	.	.	.	.
CG17888-RF	.	.	.	.	.	.	.	.	.	.	.	.	.	.	.	.
CG3114-RH	.	.	.	.	.	.	.	.	.	.	.	.	.	.	.	.
CG3153-RA	.	.	.	.	.	.	.	.	.	.	.	.	.	.	.	.
CG17800-RBB	.	.	.	.	.	.	.	.	.	.	.	.	.	.	.	.
CG13475-RA	.	.	.	.	.	.	.	.	.	.	.	.	.	.	.	.
CG7047-RB	.	.	.	.	.	.	.	.	.	.	.	.	.	.	.	.
CG11502-RC	.	.	.	.	.	.	.	.	.	.	.	.	.	.	.	.
CG42280-RE	.	.	.	.	.	.	.	.	.	.	.	.	.	.	.	.
CG18004-RC	.	.	.	.	.	.	.	.	.	.	.	.	.	.	.	.
CG32490-RL	.	.	.	.	.	.	.	.	.	.	.	.	.	.	.	.
CG9739-RD	.	.	.	.	.	.	.	.	.	.	.	.	.	.	.	.
CG15427-RC	.	.	.	.	.	.	.	.	.	.	.	.	.	.	.	.
CG33991-RB	.	.	.	.	.	.	.	.	.	.	.	.	.	.	.	.
FlyExpress_Salm	chr2L	11445995	11445996	381	chr2L	11447798	11447799	2184	.	.	.	.	.	.	.	.
FlyExpress_Bun	.	.	.	.	.	.	.	.	.	.	.	.	.	.	.	.
FlyExpress_CG15480	chr2L	13225403	13225404	197	chr2L	13227215	13227216	2009	.	.	.	.	.	.	.	.
FlyExpress_Su(H)	chr2L	15039353	15039354	134	chr2L	15038932	15038933	555	.	.	.	.	.	.	.	.
FlyExpress_Kel	.	.	.	.	.	.	.	.	.	.	.	.	.	.	.	.
FlyExpress_cad	chr2L	20770527	20770528	203	.	.	.	.	.	.	.	.	.	.	.	.
FlyExpress_atet	.	.	.	.	.	.	.	.	.	.	.	.	.	.	.	.
FlyExpress_Rapgap1	.	.	.	.	.	.	.	.	.	.	.	.	.	.	.	.
FlyExpress_net	chr2L	89353	89354	1971	chr2L	91520	91521	4138	chr2L	91988	91989	4606	.	.	.	.
FlyExpress_Scat	.	.	.	.	.	.	.	.	.	.	.	.	.	.	.	.
Flyexpress_cyp310a1	.	.	.	.	.	.	.	.	.	.	.	.	.	.	.	.
FlyExpress_CG15094	.	.	.	.	.	.	.	.	.	.	.	.	.	.	.	.
FlyExpress_l(2)08717	chr2R	14690275	14690276	0	.	.	.	.	.	.	.	.	.	.	.	.
FlyExpress_CG5532	.	.	.	.	.	.	.	.	.	.	.	.	.	.	.	.
FlyExpress_CG2915	.	.	.	.	.	.	.	.	.	.	.	.	.	.	.	.
FlyExpress_Dap	chr2R	5602192	5602193	0	.	.	.	.	.	.	.	.	.	.	.	.
FlyExpress_inv	.	.	.	.	.	.	.	.	.	.	.	.	.	.	.	.
FlyExpress_Chrb	.	.	.	.	.	.	.	.	.	.	.	.	.	.	.	.
FlyExpress_CG9238	chr3L	14540178	14540179	0	.	.	.	.	.	.	.	.	.	.	.	.
FlyExpress_aos	.	.	.	.	.	.	.	.	.	.	.	.	.	.	.	.
FlyExpress_CG2162	chr3L	3037895	3037896	0	.	.	.	.	.	.	.	.	.	.	.	.
FlyExpress_CG10479	.	.	.	.	.	.	.	.	.	.	.	.	.	.	.	.
FlyExpress_Dl	.	.	.	.	.	.	.	.	.	.	.	.	.	.	.	.
FlyExpress_bnl	.	.	.	.	.	.	.	.	.	.	.	.	.	.	.	.
FlyExpress_CG33099	chr3R	18353595	18353596	1046	.	.	.	.	.	.	.	.	.	.	.	.
FlyExpress_e(spl)m5-HLH	chr3R	21856502	21856503	1045	.	.	.	.	.	.	.	.	.	.	.	.
FlyExpress_Ama	chr3R	2588944	2588945	0	.	.	.	.	.	.	.	.	.	.	.	.
FlyExpress_CG11966	.	.	.	.	.	.	.	.	.	.	.	.	.	.	.	.
FlyExpress_CG12420	.	.	.	.	.	.	.	.	.	.	.	.	.	.	.	.
FlyExpress_yellow-e3	.	.	.	.	.	.	.	.	.	.	.	.	.	.	.	.
FlyExpress_mew	.	.	.	.	.	.	.	.	.	.	.	.	.	.	.	.
FlyExpress_rst	.	.	.	.	.	.	.	.	.	.	.	.	.	.	.	.

## Sheet: 10kb_Gene_to_Peak
#chr	start	end	feature.id_1	feature.id_2	feature.id_3	feature.id_4
chr2R	4959563	4959564	CG8084-RA	.	.	.
chr3R	12882217	12882218	.	.	.	.
chr2R	7084865	7084866	.	.	.	.
chr2L	8846878	8846879	.	.	.	.
chr3L	14143549	14143550	.	.	.	.
chr2L	8872575	8872576	.	.	.	.
chrX	7201745	7201746	CG9653-RA	.	.	.
chr3L	12642288	12642289	.	.	.	.
chr3L	900525	900526	CG13906-RA	.	.	.
chr3R	11925615	11925616	CG31045-RF	.	.	.
chr2L	518626	518627	CG2762-RA	.	.	.
chrX	7216230	7216231	.	.	.	.
chr2L	9146490	9146491	.	.	.	.
chr3L	14145113	14145114	.	.	.	.
chrX	7215050	7215051	.	.	.	.
chr3L	744524	744525	.	.	.	.
chr2R	5943941	5943942	CG2264-RB	.	.	.
chr3L	15032667	15032668	.	.	.	.
chrX	7187612	7187613	.	.	.	.
chr3L	14958126	14958127	.	.	.	.
chr3R	11244147	11244148	.	.	.	.
chr2R	7086553	7086554	.	.	.	.
chr2L	8842031	8842032	.	.	.	.
chr2L	20204591	20204592	.	.	.	.
chr2L	8849388	8849389	.	.	.	.
chr2L	19575963	19575964	.	.	.	.
chr3R	17431466	17431467	.	.	.	.
chr3L	699499	699500	.	.	.	.
chrX	7193930	7193931	CG9653-RA	.	.	.
chrX	5590793	5590794	.	.	.	.
chr2R	4958868	4958869	CG8084-RA	.	.	.
chr2L	91520	91521	FlyExpress_net	.	.	.
chr2L	12666270	12666271	.	.	.	.
chr2L	18895473	18895474	.	.	.	.
chr2R	5964776	5964777	CG12919-RA	.	.	.
chr3R	21472938	21472939	.	.	.	.
chr3L	21269968	21269969	.	.	.	.
chr3L	640490	640491	.	.	.	.
chr3L	14445769	14445770	.	.	.	.
chrX	8188244	8188245	.	.	.	.
chr3L	5849766	5849767	.	.	.	.
chr2L	249243	249244	.	.	.	.
chr2L	8876062	8876063	.	.	.	.
chr3R	2636547	2636548	.	.	.	.
chr3R	2588944	2588945	FlyExpress_Ama	CG1046-RA	.	.
chr2L	8416931	8416932	.	.	.	.
chr2L	13225403	13225404	FlyExpress_CG15480	.	.	.
chr3R	11854359	11854360	.	.	.	.
chr3L	18214359	18214360	.	.	.	.
chr3R	3467989	3467990	.	.	.	.
chr2L	20822813	20822814	.	.	.	.
chr3L	9849000	9849001	CG6721-RA	.	.	.
chr3R	3938777	3938778	.	.	.	.
chr3L	16171819	16171820	.	.	.	.
chr3R	5154744	5154745	.	.	.	.
chr3R	19712439	19712440	.	.	.	.
chr3R	397155	397156	.	.	.	.
chr2L	8825446	8825447	CG18024-RA	.	.	.
chr3R	25133011	25133012	.	.	.	.
chr3L	9032270	9032271	CG5133-RA	.	.	.
chr3L	11686023	11686024	.	.	.	.
chr2R	5943172	5943173	CG2264-RB	.	.	.
chr3R	2916973	2916974	.	.	.	.
chrX	17262828	17262829	.	.	.	.
chr3L	162070	162071	.	.	.	.
chr3R	5960211	5960212	.	.	.	.
chrX	12548561	12548562	CG2028-RC	.	.	.
chr3R	2934263	2934264	.	.	.	.
chr3L	14950036	14950037	.	.	.	.
chr2R	5378382	5378383	CG1916-RA	.	.	.
chr3R	16118438	16118439	.	.	.	.
chr3R	25373766	25373767	CG1897-RA	.	.	.
chr3R	11246479	11246480	.	.	.	.
chr2R	9467441	9467442	.	.	.	.
chrX	7195399	7195400	CG9653-RA	.	.	.
chr2L	19161472	19161473	CG10719-RC	.	.	.
chr3L	7903514	7903515	.	.	.	.
chr2R	6470052	6470053	.	.	.	.
chrX	21858561	21858562	.	.	.	.
chr3R	6442739	6442740	.	.	.	.
chr3L	8996581	8996582	CG5093-RA	.	.	.
chrX	19660005	19660006	.	.	.	.
chr2R	20944710	20944711	CG3388-RA	.	.	.
chr3R	21856502	21856503	FlyExpress_e(spl)m5-HLH	.	.	.
chr2R	11017260	11017261	.	.	.	.
chr2R	6470932	6470933	.	.	.	.
chrX	5793939	5793940	.	.	.	.
chr2L	11447798	11447799	FlyExpress_Salm	.	.	.
chrX	19192424	19192425	.	.	.	.
chr2L	2451128	2451129	.	.	.	.
chr2R	17536634	17536635	CG10082-RB	.	.	.
chr2R	8846263	8846264	.	.	.	.
chr2R	5945423	5945424	CG2264-RB	.	.	.
chr2L	21629319	21629320	.	.	.	.
chr2L	2454829	2454830	.	.	.	.
chr3L	9035479	9035480	CG5133-RA	CG32031-RC	.	.
chrX	8307084	8307085	.	.	.	.
chr3L	9033834	9033835	CG5133-RA	.	.	.
chr2R	17252224	17252225	.	.	.	.
chr3R	17273421	17273422	.	.	.	.
chrX	7186407	7186408	.	.	.	.
chr2L	12011953	12011954	.	.	.	.
chrX	5641219	5641220	.	.	.	.
chr2R	19094615	19094616	.	.	.	.
chr3L	2385879	2385880	CG13800-RA	.	.	.
chr3L	6760307	6760308	.	.	.	.
chr2L	8841513	8841514	.	.	.	.
chr2L	12007443	12007444	.	.	.	.
chr3L	5987155	5987156	.	.	.	.
chr3L	2438348	2438349	.	.	.	.
chr3R	2549554	2549555	.	.	.	.
chr3R	5205073	5205074	.	.	.	.
chr2R	15954265	15954266	.	.	.	.
chrX	7200186	7200187	CG9653-RA	.	.	.
chr2L	15478477	15478478	.	.	.	.
chr2L	2457153	2457154	.	.	.	.
chr2R	8883838	8883839	.	.	.	.
chr3R	24889099	24889100	.	.	.	.
chr2L	11450691	11450692	FlyExpress_Salm	.	.	.
chr3L	19901836	19901837	.	.	.	.
chrX	3671474	3671475	.	.	.	.
chr3R	265	266	.	.	.	.
chrX	8785925	8785926	.	.	.	.
chr3R	19169169	19169170	.	.	.	.
chr2R	5602192	5602193	FlyExpress_Dap	.	.	.
chr3R	12774464	12774465	.	.	.	.
chr3L	9037074	9037075	CG5133-RA	CG32031-RC	.	.
chr3L	9848010	9848011	CG6721-RA	.	.	.
chrX	7122990	7122991	.	.	.	.
chr2R	11015555	11015556	.	.	.	.
chr2L	6088479	6088480	CG18783-RB	.	.	.
chr2L	19576985	19576986	.	.	.	.
chr3L	3374188	3374189	.	.	.	.
chr3R	17442134	17442135	.	.	.	.
chr2L	11445995	11445996	FlyExpress_Salm	.	.	.
chr3L	2867746	2867747	.	.	.	.
chr3L	14961201	14961202	.	.	.	.
chr2L	13851169	13851170	.	.	.	.
chr3L	5976170	5976171	FlyExpress_CG10479	.	.	.
chr3R	16078934	16078935	.	.	.	.
chr2L	19865729	19865730	.	.	.	.
chr3L	21469834	21469835	.	.	.	.
chr2R	20995332	20995333	CG16778-RC	.	.	.
chr3L	1479189	1479190	.	.	.	.
chrX	3673905	3673906	.	.	.	.
chr2L	2449047	2449048	.	.	.	.
chr2L	6724456	6724457	.	.	.	.
chr2R	7079321	7079322	.	.	.	.
chr3R	25596904	25596905	CG33956-RD	.	.	.
chr3L	3037895	3037896	FlyExpress_CG2162	.	.	.
chr2R	17255140	17255141	.	.	.	.
chr2R	7071092	7071093	.	.	.	.
chr3R	12067209	12067210	.	.	.	.
chrX	18137619	18137620	.	.	.	.
chr3L	15038510	15038511	.	.	.	.
chr3L	8668945	8668946	.	.	.	.
chr2R	5729980	5729981	.	.	.	.
chr3R	15861864	15861865	.	.	.	.
chr3L	5850332	5850333	.	.	.	.
chr2L	18890339	18890340	CG10619-RB	.	.	.
chr3R	19555969	19555970	.	.	.	.
chr2R	8879357	8879358	.	.	.	.
chrX	6588703	6588704	.	.	.	.
chr3R	7204381	7204382	CG17228-RF	.	.	.
chr3R	25409361	25409362	.	.	.	.
chr2R	13689401	13689402	.	.	.	.
chr3L	13067575	13067576	.	.	.	.
chr3L	16484426	16484427	FlyExpress_aos	.	.	.
chr2L	6079096	6079097	.	.	.	.
chrX	9580547	9580548	CG12653-RA	.	.	.
chr3R	2817792	2817793	.	.	.	.
chr3L	14129104	14129105	.	.	.	.
chr2L	8365861	8365862	.	.	.	.
chrX	15780837	15780838	.	.	.	.
chr2R	15614438	15614439	.	.	.	.
chrX	7831924	7831925	.	.	.	.
chr2R	17390243	17390244	.	.	.	.
chr3R	16655690	16655691	.	.	.	.
chr2L	1954697	1954698	.	.	.	.
chr2R	17411491	17411492	.	.	.	.
chr3L	16468980	16468981	FlyExpress_aos	.	.	.
chr3R	12456538	12456539	.	.	.	.
chr3R	4293619	4293620	CG45263-RA	.	.	.
chr2R	12527682	12527683	.	.	.	.
chr3R	2892933	2892934	.	.	.	.
chr3R	15158054	15158055	FlyExpress_Dl	.	.	.
chr3L	5862838	5862839	.	.	.	.
chr2R	13709901	13709902	.	.	.	.
chr3R	18498857	18498858	.	.	.	.
chr2R	19460607	19460608	.	.	.	.
chr3L	16037005	16037006	.	.	.	.
chr3R	23468226	23468227	.	.	.	.
chr2R	20401610	20401611	.	.	.	.
chr2R	17362848	17362849	.	.	.	.
chr2R	7604164	7604165	CG13194-RB	.	.	.
chr2L	12010526	12010527	.	.	.	.
chr2L	2454072	2454073	.	.	.	.
chr3R	23757428	23757429	.	.	.	.
chr2R	17362357	17362358	.	.	.	.
chr3L	14139541	14139542	.	.	.	.
chrX	17683690	17683691	.	.	.	.
chrX	8936219	8936220	.	.	.	.
chr3L	698637	698638	.	.	.	.
chr2L	10056990	10056991	.	.	.	.
chrX	2359943	2359944	.	.	.	.
chr2L	481272	481273	.	.	.	.
chr3R	16369035	16369036	.	.	.	.
chr2R	2550773	2550774	.	.	.	.
chr3L	11580356	11580357	.	.	.	.
chr2R	4543280	4543281	.	.	.	.
chr3R	11494862	11494863	.	.	.	.
chr3R	4031460	4031461	.	.	.	.
chr2R	2404102	2404103	.	.	.	.
chrX	13263707	13263708	.	.	.	.
chr3L	21019622	21019623	.	.	.	.
chr2L	15319925	15319926	.	.	.	.
chrX	2879520	2879521	.	.	.	.
chr2L	19137009	19137010	.	.	.	.
chrX	12644575	12644576	.	.	.	.
chr2L	16286633	16286634	.	.	.	.
chr3R	27047079	27047080	.	.	.	.
chr2R	13935510	13935511	.	.	.	.
chr3R	15164946	15164947	.	.	.	.
chr2R	16215512	16215513	.	.	.	.
chr2L	13235405	13235406	.	.	.	.
chr3R	11860019	11860020	.	.	.	.
chr2L	19324875	19324876	.	.	.	.
chrX	4317930	4317931	.	.	.	.
chr3R	12893645	12893646	.	.	.	.
chr2L	18783350	18783351	.	.	.	.
chr3R	14447047	14447048	.	.	.	.
chr2L	16859209	16859210	.	.	.	.
chr3R	12528848	12528849	.	.	.	.
chrX	9445155	9445156	.	.	.	.
chr2L	15324500	15324501	.	.	.	.
chr2L	13549170	13549171	.	.	.	.
chr3R	16118849	16118850	.	.	.	.
chrX	5584555	5584556	.	.	.	.
chr2R	8883117	8883118	.	.	.	.
chr3L	5987431	5987432	.	.	.	.
chr3R	4856038	4856039	CG11988-RA	.	.	.
chr3R	12229329	12229330	.	.	.	.
chr3L	9010275	9010276	CG5187-RA	.	.	.
chr3L	8998185	8998186	CG5093-RA	.	.	.
chr2L	12011095	12011096	.	.	.	.
chr3R	864836	864837	.	.	.	.
chr2R	3940305	3940306	.	.	.	.
chr2L	12461144	12461145	.	.	.	.
chr3L	16037529	16037530	.	.	.	.
chr2R	8906966	8906967	.	.	.	.
chr3R	913029	913030	.	.	.	.
chrX	19783175	19783176	.	.	.	.
chr4	717483	717484	.	.	.	.
chr3R	14814204	14814205	.	.	.	.
chr2R	20770210	20770211	.	.	.	.
chrX	16531592	16531593	.	.	.	.
chr2L	9150217	9150218	.	.	.	.
chr3R	12589628	12589629	.	.	.	.
chr3L	15037250	15037251	.	.	.	.
chr3R	12544656	12544657	.	.	.	.
chr3R	7603930	7603931	.	.	.	.
chr3L	8500377	8500378	.	.	.	.
chr3R	8471765	8471766	CG6234-RA	CG6753-RA	.	.
chrX	5795734	5795735	.	.	.	.
chr2L	7519888	7519889	.	.	.	.
chrX	16549930	16549931	.	.	.	.
chr3L	8072913	8072914	CG34373-RG	.	.	.
chr3L	2881792	2881793	.	.	.	.
chr3R	10481001	10481002	.	.	.	.
chr3R	20692751	20692752	.	.	.	.
chr3R	12887711	12887712	.	.	.	.
chr3R	21325796	21325797	.	.	.	.
chr2R	17250948	17250949	.	.	.	.
chr2R	12047621	12047622	CG8434-RA	.	.	.
chrX	12557719	12557720	CG2028-RC	.	.	.
chr3R	25111826	25111827	.	.	.	.
chrX	1128135	1128136	.	.	.	.
chr3R	14754344	14754345	.	.	.	.
chrX	2876668	2876669	FlyExpress_rst	.	.	.
chr2R	5329004	5329005	.	.	.	.
chr3L	2439248	2439249	.	.	.	.
chr2L	16601760	16601761	.	.	.	.
chrX	6716815	6716816	.	.	.	.
chr3R	10282964	10282965	.	.	.	.
chrX	17402590	17402591	.	.	.	.
chr2R	16013873	16013874	.	.	.	.
chr3R	1474298	1474299	.	.	.	.
chrX	20565158	20565159	.	.	.	.
chr3R	10679871	10679872	.	.	.	.
chrX	21239958	21239959	.	.	.	.
chr3L	319749	319750	.	.	.	.
chr2R	8872670	8872671	.	.	.	.
chr3R	7824045	7824046	.	.	.	.
chr2L	11358554	11358555	.	.	.	.
chrX	8189447	8189448	.	.	.	.
chr2L	17222440	17222441	.	.	.	.
chr3R	6783246	6783247	.	.	.	.
chr2R	19462206	19462207	.	.	.	.
chr2L	2449953	2449954	.	.	.	.
chrX	6443944	6443945	.	.	.	.
chr3R	4013330	4013331	.	.	.	.
chr3L	9034243	9034244	CG5133-RA	.	.	.
chr3R	19169578	19169579	.	.	.	.
chr3R	14816768	14816769	.	.	.	.
chrX	19658856	19658857	.	.	.	.
chrX	15850392	15850393	.	.	.	.
chr3R	12887385	12887386	.	.	.	.
chr3L	22260225	22260226	.	.	.	.
chrX	8569073	8569074	.	.	.	.
chr3L	14124816	14124817	.	.	.	.
chr2R	4535899	4535900	.	.	.	.
chr3R	12906836	12906837	.	.	.	.
chr3R	19172142	19172143	.	.	.	.
chr2R	18690912	18690913	.	.	.	.
chr3L	9034632	9034633	CG5133-RA	.	.	.
chr3L	5975099	5975100	FlyExpress_CG10479	.	.	.
chr2L	15330872	15330873	.	.	.	.
chr3L	9415795	9415796	.	.	.	.
chr2L	9602293	9602294	.	.	.	.
chr3L	22396090	22396091	.	.	.	.
chr2L	12529934	12529935	.	.	.	.
chr3R	837	838	.	.	.	.
chrX	5589778	5589779	.	.	.	.
chr3L	21278866	21278867	.	.	.	.
chr3R	5811619	5811620	.	.	.	.
chrX	17071987	17071988	CG5055-RB	.	.	.
chr3R	1037154	1037155	.	.	.	.
chr2R	17211310	17211311	.	.	.	.
chr3R	13959655	13959656	.	.	.	.
chr2L	5239877	5239878	.	.	.	.
chr3L	639829	639830	.	.	.	.
chr3R	1414068	1414069	.	.	.	.
chr2L	523080	523081	CG2762-RA	.	.	.
chr2R	3918566	3918567	.	.	.	.
chr3L	4230537	4230538	.	.	.	.
chr3R	2580238	2580239	CG1046-RA	FlyExpress_Ama	.	.
chrX	9176840	9176841	.	.	.	.
chrX	4319122	4319123	.	.	.	.
chr2R	595299	595300	.	.	.	.
chr2L	14435949	14435950	.	.	.	.
chr3R	12378056	12378057	.	.	.	.
chrX	8189854	8189855	.	.	.	.
chr2L	5461641	5461642	CG6634-RA	.	.	.
chr2L	2945966	2945967	.	.	.	.
chr3L	762263	762264	.	.	.	.
chr2L	9121101	9121102	.	.	.	.
chr3R	1438298	1438299	.	.	.	.
chr3R	8472086	8472087	CG6234-RA	CG6753-RA	.	.
chrX	1718048	1718049	.	.	.	.
chr3R	18353595	18353596	FlyExpress_CG33099	.	.	.
chr2R	20743008	20743009	.	.	.	.
chr2L	6323901	6323902	CG9491-RC	.	.	.
chr3R	3282792	3282793	.	.	.	.
chr2R	17363360	17363361	.	.	.	.
chr3R	13430902	13430903	.	.	.	.
chr3R	8837918	8837919	.	.	.	.
chr3L	5853503	5853504	.	.	.	.
chr2L	8832489	8832490	CG18024-RA	.	.	.
chr2L	15323573	15323574	.	.	.	.
chr3R	12674546	12674547	.	.	.	.
chr2L	16817404	16817405	.	.	.	.
chr3L	14146196	14146197	.	.	.	.
chr2L	8276627	8276628	.	.	.	.
chr3L	21472802	21472803	.	.	.	.
chr2L	9449326	9449327	CG3779-RA	.	.	.
chr3R	3939887	3939888	.	.	.	.
chr3R	683895	683896	.	.	.	.
chr3L	2429131	2429132	.	.	.	.
chr3R	12056206	12056207	.	.	.	.
chr3L	14170756	14170757	.	.	.	.
chr3R	17432624	17432625	.	.	.	.
chr2R	9335554	9335555	.	.	.	.
chr2L	19135351	19135352	.	.	.	.
chrX	6883107	6883108	.	.	.	.
chr2R	14560881	14560882	.	.	.	.
chr2L	4821278	4821279	.	.	.	.
chr3R	9638595	9638596	.	.	.	.
chr2R	7072242	7072243	.	.	.	.
chr3R	11897775	11897776	.	.	.	.
chr2R	5180166	5180167	.	.	.	.
chr2L	18875263	18875264	CG10619-RB	.	.	.
chr3R	11855352	11855353	.	.	.	.
chrX	3735875	3735876	.	.	.	.
chr3R	9510687	9510688	.	.	.	.
chr3L	22169811	22169812	.	.	.	.
chr3R	12057569	12057570	.	.	.	.
chr2R	18578151	18578152	.	.	.	.
chrX	417476	417477	.	.	.	.
chr2L	8415799	8415800	.	.	.	.
chrX	9360626	9360627	.	.	.	.
chrX	2018210	2018211	.	.	.	.
chr3R	2826727	2826728	.	.	.	.
chr2R	7905297	7905298	.	.	.	.
chr3R	12884871	12884872	.	.	.	.
chrX	9638283	9638284	.	.	.	.
chr2L	4893741	4893742	.	.	.	.
chr3L	14540178	14540179	FlyExpress_CG9238	.	.	.
chr3R	7198573	7198574	CG17228-RF	.	.	.
chrX	7853141	7853142	.	.	.	.
chr3R	12783634	12783635	.	.	.	.
chr2R	5965706	5965707	CG12919-RA	CG2269-RC	.	.
chrX	22257134	22257135	.	.	.	.
chr3R	7179365	7179366	.	.	.	.
chr3R	8471139	8471140	CG6234-RA	CG6753-RA	.	.
chrX	13564833	13564834	CG11164-RA	.	.	.
chr3L	8826150	8826151	.	.	.	.
chr3R	11820189	11820190	.	.	.	.
chr2R	3306271	3306272	.	.	.	.
chr2R	7087312	7087313	.	.	.	.
chr3L	10850955	10850956	.	.	.	.
chr3R	21021124	21021125	CG13653-RA	CG13654-RA	.	.
chr3L	9449143	9449144	.	.	.	.
chr2L	7038695	7038696	.	.	.	.
chr2L	13227215	13227216	FlyExpress_CG15480	.	.	.
chr2L	2448472	2448473	.	.	.	.
chr2R	4872646	4872647	.	.	.	.
chr2R	17138292	17138293	.	.	.	.
chr2R	12038295	12038296	.	.	.	.
chr2L	1420247	1420248	CG5481-RA	.	.	.
chr3L	22393441	22393442	.	.	.	.
chr2L	8416161	8416162	.	.	.	.
chr2L	13905227	13905228	CG8827-RA	CG16869-RA	.	.
chrX	7211289	7211290	CG9653-RA	.	.	.
chr2L	9988507	9988508	.	.	.	.
chr3R	14380550	14380551	.	.	.	.
chr2L	9167150	9167151	.	.	.	.
chr2L	20783315	20783316	.	.	.	.
chrX	10716877	10716878	CG1691-RF	.	.	.
chr2R	10921923	10921924	.	.	.	.
chr2L	7420061	7420062	.	.	.	.
chrX	14642747	14642748	CG10521-RA	.	.	.
chr3R	4007324	4007325	.	.	.	.
chr3L	12640693	12640694	.	.	.	.
chr2R	2020358	2020359	.	.	.	.
chr3R	6469293	6469294	CG17117-RE	.	.	.
chr2R	9457102	9457103	.	.	.	.
chr3L	11546228	11546229	.	.	.	.
chr3L	682632	682633	.	.	.	.
chr3L	10856136	10856137	.	.	.	.
chr3L	15033653	15033654	.	.	.	.
chrX	8331575	8331576	.	.	.	.
chr2R	17138739	17138740	.	.	.	.
chr2L	11807159	11807160	CG14938-RD	.	.	.
chr3R	11810712	11810713	.	.	.	.
chr2R	8867911	8867912	.	.	.	.
chrX	19742907	19742908	.	.	.	.
chr2R	17251583	17251584	.	.	.	.
chr2R	6446420	6446421	.	.	.	.
chr3L	19172580	19172581	.	.	.	.
chr3L	16005724	16005725	.	.	.	.
chr3R	3944086	3944087	.	.	.	.
chr3L	6814430	6814431	.	.	.	.
chr2L	19323862	19323863	.	.	.	.
chr3R	20098396	20098397	CG13610-RA	.	.	.
chrX	15705985	15705986	.	.	.	.
chr2L	19791243	19791244	.	.	.	.
chr2R	9471674	9471675	.	.	.	.
chr3R	13275185	13275186	.	.	.	.
chr2L	18839494	18839495	.	.	.	.
chr2L	17752422	17752423	.	.	.	.
chr2L	15732174	15732175	CG3938-RB	.	.	.
chr3L	13371495	13371496	CG10717-RA	.	.	.
chrX	7854645	7854646	.	.	.	.
chr2R	16533924	16533925	.	.	.	.
chr2R	11563951	11563952	.	.	.	.
chr3L	12685910	12685911	.	.	.	.
chr2R	11563323	11563324	.	.	.	.
chr3R	10645567	10645568	CG33555-RG	.	.	.
chr2L	89353	89354	FlyExpress_net	.	.	.
chrX	1134058	1134059	.	.	.	.
chr3R	25115132	25115133	.	.	.	.
chr3R	11924492	11924493	CG31045-RF	.	.	.
chr3R	7178692	7178693	.	.	.	.
chr3L	9013891	9013892	CG5187-RA	.	.	.
chrX	13262611	13262612	.	.	.	.
chr2R	16801662	16801663	.	.	.	.
chrX	21342630	21342631	.	.	.	.
chr2L	5461323	5461324	CG6634-RA	.	.	.
chr2L	18150109	18150110	.	.	.	.
chr2R	11266274	11266275	.	.	.	.
chr2L	3822774	3822775	.	.	.	.
chr2R	15921164	15921165	.	.	.	.
chr2L	14512775	14512776	.	.	.	.
chr2R	2873286	2873287	.	.	.	.
chr2R	9472194	9472195	.	.	.	.
chrX	12636090	12636091	.	.	.	.
chrX	4484161	4484162	.	.	.	.
chr3L	15658730	15658731	.	.	.	.
chr2R	7070145	7070146	.	.	.	.
chr3R	5705463	5705464	.	.	.	.
chr3L	22938139	22938140	.	.	.	.
chr2L	13049006	13049007	.	.	.	.
chr2L	19156369	19156370	.	.	.	.
chr2R	17250562	17250563	.	.	.	.
chr2R	15423248	15423249	.	.	.	.
chr2R	10898409	10898410	.	.	.	.
chr3L	21873757	21873758	.	.	.	.
chr2L	5458760	5458761	CG6634-RA	.	.	.
chrX	580814	580815	.	.	.	.
chr3R	12878700	12878701	.	.	.	.
chr2L	5306627	5306628	.	.	.	.
chr3L	9012699	9012700	CG5187-RA	.	.	.
chr2L	5799393	5799394	.	.	.	.
chrX	8936774	8936775	.	.	.	.
chr2L	15320489	15320490	.	.	.	.
chr3L	11003521	11003522	CG12296-RA	.	.	.
chrX	19645163	19645164	.	.	.	.
chr2R	6471921	6471922	.	.	.	.
chrX	7841120	7841121	.	.	.	.
chr3L	11230167	11230168	.	.	.	.
chr3L	18396303	18396304	.	.	.	.
chr2L	10003795	10003796	.	.	.	.
chr2L	13548206	13548207	.	.	.	.
chr2L	20770527	20770528	FlyExpress_cad	.	.	.
chr3R	2826525	2826526	.	.	.	.
chr3R	7198188	7198189	CG17228-RF	.	.	.
chr3R	11413227	11413228	.	.	.	.
chr3R	12637612	12637613	.	.	.	.
chr3R	25590063	25590064	CG33956-RD	.	.	.
chr2R	6471318	6471319	.	.	.	.
chr2R	17211063	17211064	.	.	.	.
chr2R	20688449	20688450	.	.	.	.
chrX	511694	511695	.	.	.	.
chrX	1293789	1293790	.	.	.	.
chrX	1935722	1935723	.	.	.	.
chrX	3636532	3636533	.	.	.	.
chrX	6879808	6879809	.	.	.	.
chrX	8936430	8936431	.	.	.	.
chrX	8942133	8942134	.	.	.	.
chrX	11923080	11923081	.	.	.	.
chrX	12646063	12646064	.	.	.	.
chrX	14643192	14643193	CG10521-RA	.	.	.
chrX	17724837	17724838	.	.	.	.
chr3L	224839	224840	.	.	.	.
chr3L	258276	258277	.	.	.	.
chr3L	378266	378267	CG6883-RA	.	.	.
chr3L	668732	668733	.	.	.	.
chr3L	779709	779710	.	.	.	.
chr3L	872570	872571	.	.	.	.
chr3L	1334816	1334817	.	.	.	.
chr3L	1352218	1352219	.	.	.	.
chr3L	1731131	1731132	CG7995-RD	.	.	.
chr3L	2437114	2437115	.	.	.	.
chr3L	3197621	3197622	.	.	.	.
chr3L	3411435	3411436	.	.	.	.
chr3L	3593871	3593872	.	.	.	.
chr3L	4252359	4252360	CG15010-RA	.	.	.
chr3L	4253025	4253026	CG15010-RA	.	.	.
chr3L	5597381	5597382	CG10591-RA	.	.	.
chr3L	5729345	5729346	.	.	.	.
chr3L	5976279	5976280	FlyExpress_CG10479	.	.	.
chr3L	6178025	6178026	.	.	.	.
chr3L	6182216	6182217	.	.	.	.
chr3L	6274529	6274530	.	.	.	.
chr3L	6282219	6282220	.	.	.	.
chr3L	6384251	6384252	.	.	.	.
chr3L	6389626	6389627	.	.	.	.
chr3L	6757987	6757988	.	.	.	.
chr3L	7721512	7721513	.	.	.	.
chr3L	8068112	8068113	CG34373-RG	.	.	.
chr3L	8100462	8100463	.	.	.	.
chr3L	8109198	8109199	.	.	.	.
chr3L	8569167	8569168	.	.	.	.
chr3L	8819138	8819139	.	.	.	.
chr3L	8820343	8820344	.	.	.	.
chr3L	8826657	8826658	.	.	.	.
chr3L	9146200	9146201	.	.	.	.
chr3L	9428666	9428667	.	.	.	.
chr3L	9454339	9454340	.	.	.	.
chr3L	10311902	10311903	.	.	.	.
chr3L	10388651	10388652	.	.	.	.
chr3L	10804184	10804185	.	.	.	.
chr3L	10850425	10850426	.	.	.	.
chr3L	11112986	11112987	.	.	.	.
chr3L	11125332	11125333	.	.	.	.
chr3L	11128309	11128310	.	.	.	.
chr3L	11203690	11203691	.	.	.	.
chr3L	11672476	11672477	.	.	.	.
chr3L	12293170	12293171	.	.	.	.
chr3L	12329610	12329611	.	.	.	.
chr3L	12463668	12463669	.	.	.	.
chr3L	12507947	12507948	.	.	.	.
chr3L	12602884	12602885	.	.	.	.
chr3L	12690916	12690917	.	.	.	.
chr3L	12698587	12698588	.	.	.	.
chr3L	13025341	13025342	.	.	.	.
chr3L	13113592	13113593	.	.	.	.
chr3L	13221119	13221120	.	.	.	.
chr3L	13957847	13957848	.	.	.	.
chr3L	14044193	14044194	.	.	.	.
chr3L	14625246	14625247	CG9628-RB	.	.	.
chr3L	14625532	14625533	CG9628-RB	.	.	.
chr3L	15087895	15087896	.	.	.	.
chr3L	15168445	15168446	.	.	.	.
chr3L	15255520	15255521	.	.	.	.
chr3L	15323700	15323701	CG7250-RA	.	.	.
chr3L	15696708	15696709	.	.	.	.
chr3L	15976116	15976117	.	.	.	.
chr3L	16359654	16359655	.	.	.	.
chr3L	16577311	16577312	.	.	.	.
chr3L	16581569	16581570	.	.	.	.
chr3L	17469069	17469070	.	.	.	.
chr3L	17507223	17507224	.	.	.	.
chr3L	17527553	17527554	.	.	.	.
chr3L	19889586	19889587	.	.	.	.
chr3L	19890426	19890427	.	.	.	.
chr3L	19908083	19908084	.	.	.	.
chr3L	20369134	20369135	.	.	.	.
chr3L	20671721	20671722	.	.	.	.
chr3L	21018544	21018545	.	.	.	.
chr3L	21060642	21060643	CG32434-RC	.	.	.
chr3L	21426454	21426455	.	.	.	.
chr3L	21633945	21633946	.	.	.	.
chr3L	21721902	21721903	.	.	.	.
chr3L	22187451	22187452	.	.	.	.
chr3L	22396569	22396570	.	.	.	.
chr3L	22856967	22856968	CG8385-RH	.	.	.
chr2L	91988	91989	FlyExpress_net	.	.	.
chr2L	161192	161193	.	.	.	.
chr2L	161903	161904	.	.	.	.
chr2L	1076541	1076542	.	.	.	.
chr2L	1119150	1119151	.	.	.	.
chr2L	1366273	1366274	.	.	.	.
chr2L	1518058	1518059	.	.	.	.
chr2L	2164877	2164878	.	.	.	.
chr2L	2577170	2577171	.	.	.	.
chr2L	2885149	2885150	.	.	.	.
chr2L	3080598	3080599	.	.	.	.
chr2L	3566593	3566594	.	.	.	.
chr2L	3771884	3771885	.	.	.	.
chr2L	3862633	3862634	.	.	.	.
chr2L	4597833	4597834	CG33196-RC	.	.	.
chr2L	4811831	4811832	.	.	.	.
chr2L	5325211	5325212	.	.	.	.
chr2L	5877798	5877799	.	.	.	.
chr2L	6133520	6133521	.	.	.	.
chr2L	6134089	6134090	.	.	.	.
chr2L	6498531	6498532	.	.	.	.
chr2L	6967710	6967711	.	.	.	.
chr2L	6968000	6968001	.	.	.	.
chr2L	7306941	7306942	.	.	.	.
chr2L	7498389	7498390	.	.	.	.
chr2L	7799888	7799889	.	.	.	.
chr2L	8302970	8302971	.	.	.	.
chr2L	8511829	8511830	.	.	.	.
chr2L	8521989	8521990	.	.	.	.
chr2L	8675792	8675793	.	.	.	.
chr2L	8997547	8997548	.	.	.	.
chr2L	9758014	9758015	.	.	.	.
chr2L	10396347	10396348	.	.	.	.
chr2L	10396755	10396756	.	.	.	.
chr2L	10647830	10647831	.	.	.	.
chr2L	10732525	10732526	.	.	.	.
chr2L	10858131	10858132	.	.	.	.
chr2L	11269037	11269038	.	.	.	.
chr2L	12004013	12004014	.	.	.	.
chr2L	12436393	12436394	CG5442-RA	.	.	.
chr2L	13177020	13177021	.	.	.	.
chr2L	13245184	13245185	.	.	.	.
chr2L	13264032	13264033	.	.	.	.
chr2L	14261982	14261983	CG15288-RB	.	.	.
chr2L	14445881	14445882	.	.	.	.
chr2L	15038932	15038933	FlyExpress_Su(H)	.	.	.
chr2L	15039353	15039354	FlyExpress_Su(H)	.	.	.
chr2L	15324712	15324713	.	.	.	.
chr2L	15467909	15467910	.	.	.	.
chr2L	15485771	15485772	.	.	.	.
chr2L	16352728	16352729	.	.	.	.
chr2L	16491595	16491596	.	.	.	.
chr2L	16677148	16677149	.	.	.	.
chr2L	16679985	16679986	.	.	.	.
chr2L	16787755	16787756	.	.	.	.
chr2L	17830964	17830965	.	.	.	.
chr2L	18088121	18088122	.	.	.	.
chr2L	18358209	18358210	.	.	.	.
chr2L	18768320	18768321	.	.	.	.
chr2L	18808859	18808860	.	.	.	.
chr2L	19158746	19158747	CG10719-RC	.	.	.
chr2L	19219908	19219909	.	.	.	.
chr2L	19453563	19453564	.	.	.	.
chr2L	19475274	19475275	.	.	.	.
chr2L	19758719	19758720	.	.	.	.
chr2L	20350258	20350259	.	.	.	.
chr2L	20647512	20647513	.	.	.	.
chr2L	20676058	20676059	.	.	.	.
chr3R	604711	604712	.	.	.	.
chr3R	801358	801359	.	.	.	.
chr3R	869049	869050	.	.	.	.
chr3R	2176531	2176532	.	.	.	.
chr3R	2194114	2194115	.	.	.	.
chr3R	2206011	2206012	.	.	.	.
chr3R	2490335	2490336	.	.	.	.
chr3R	2738831	2738832	.	.	.	.
chr3R	2775097	2775098	.	.	.	.
chr3R	2863501	2863502	.	.	.	.
chr3R	2912513	2912514	.	.	.	.
chr3R	2919579	2919580	.	.	.	.
chr3R	3636040	3636041	.	.	.	.
chr3R	3733160	3733161	.	.	.	.
chr3R	4016830	4016831	.	.	.	.
chr3R	4059229	4059230	.	.	.	.
chr3R	4097825	4097826	.	.	.	.
chr3R	4303226	4303227	CG45263-RA	.	.	.
chr3R	4476588	4476589	.	.	.	.
chr3R	4573436	4573437	.	.	.	.
chr3R	4865231	4865232	CG11988-RA	.	.	.
chr3R	5031956	5031957	.	.	.	.
chr3R	5044135	5044136	.	.	.	.
chr3R	5412598	5412599	.	.	.	.
chr3R	5452838	5452839	.	.	.	.
chr3R	5463373	5463374	.	.	.	.
chr3R	5626847	5626848	.	.	.	.
chr3R	5715239	5715240	.	.	.	.
chr3R	6321797	6321798	.	.	.	.
chr3R	6347287	6347288	.	.	.	.
chr3R	6586851	6586852	.	.	.	.
chr3R	6610087	6610088	.	.	.	.
chr3R	7788677	7788678	.	.	.	.
chr3R	7954458	7954459	CG4702-RA	.	.	.
chr3R	8293681	8293682	CG31449-RA	.	.	.
chr3R	8930173	8930174	.	.	.	.
chr3R	9119414	9119415	.	.	.	.
chr3R	9263166	9263167	.	.	.	.
chr3R	9389127	9389128	.	.	.	.
chr3R	9735694	9735695	.	.	.	.
chr3R	10217180	10217181	.	.	.	.
chr3R	10247737	10247738	.	.	.	.
chr3R	10407362	10407363	.	.	.	.
chr3R	10450129	10450130	.	.	.	.
chr3R	10451787	10451788	.	.	.	.
chr3R	10481362	10481363	.	.	.	.
chr3R	10505427	10505428	.	.	.	.
chr3R	10643813	10643814	CG33555-RG	.	.	.
chr3R	11022233	11022234	.	.	.	.
chr3R	11034813	11034814	.	.	.	.
chr3R	11106611	11106612	CG4898-RB	.	.	.
chr3R	11299393	11299394	.	.	.	.
chr3R	11875374	11875375	.	.	.	.
chr3R	12267495	12267496	.	.	.	.
chr3R	12473275	12473276	.	.	.	.
chr3R	12575983	12575984	.	.	.	.
chr3R	12724494	12724495	.	.	.	.
chr3R	12759620	12759621	.	.	.	.
chr3R	12795538	12795539	.	.	.	.
chr3R	12854171	12854172	.	.	.	.
chr3R	12878576	12878577	.	.	.	.
chr3R	12880229	12880230	.	.	.	.
chr3R	12905263	12905264	.	.	.	.
chr3R	12977561	12977562	.	.	.	.
chr3R	13366028	13366029	.	.	.	.
chr3R	13429563	13429564	.	.	.	.
chr3R	13631033	13631034	.	.	.	.
chr3R	14982525	14982526	.	.	.	.
chr3R	14989790	14989791	.	.	.	.
chr3R	15625123	15625124	.	.	.	.
chr3R	15625727	15625728	.	.	.	.
chr3R	15690295	15690296	.	.	.	.
chr3R	16117666	16117667	.	.	.	.
chr3R	16774405	16774406	.	.	.	.
chr3R	16927858	16927859	.	.	.	.
chr3R	17199263	17199264	CG32491-RG	.	.	.
chr3R	17218822	17218823	.	.	.	.
chr3R	17220019	17220020	.	.	.	.
chr3R	17959714	17959715	.	.	.	.
chr3R	17960257	17960258	.	.	.	.
chr3R	18044716	18044717	.	.	.	.
chr3R	18516128	18516129	.	.	.	.
chr3R	18576508	18576509	.	.	.	.
chr3R	18615098	18615099	.	.	.	.
chr3R	18967708	18967709	.	.	.	.
chr3R	19203192	19203193	.	.	.	.
chr3R	19699748	19699749	.	.	.	.
chr3R	19757143	19757144	.	.	.	.
chr3R	19995387	19995388	.	.	.	.
chr3R	20159091	20159092	.	.	.	.
chr3R	20412362	20412363	.	.	.	.
chr3R	20639612	20639613	.	.	.	.
chr3R	20696320	20696321	.	.	.	.
chr3R	20804204	20804205	.	.	.	.
chr3R	21020626	21020627	CG13653-RA	CG13654-RA	CG11849-RA	.
chr3R	21841124	21841125	.	.	.	.
chr3R	21868052	21868053	CG8384-RA	.	.	.
chr3R	21868630	21868631	CG8384-RA	.	.	.
chr3R	21948327	21948328	.	.	.	.
chr3R	22708397	22708398	.	.	.	.
chr3R	23064849	23064850	CG31064-RA	.	.	.
chr3R	23106971	23106972	.	.	.	.
chr3R	23669730	23669731	.	.	.	.
chr3R	23811929	23811930	.	.	.	.
chr3R	23941902	23941903	.	.	.	.
chr3R	24457704	24457705	.	.	.	.
chr3R	24817791	24817792	.	.	.	.
chr3R	24938734	24938735	.	.	.	.
chr3R	25177429	25177430	.	.	.	.
chr3R	25283116	25283117	.	.	.	.
chr3R	25871314	25871315	.	.	.	.
chr3R	26581063	26581064	.	.	.	.
chr3R	26607524	26607525	.	.	.	.
chr3R	26738374	26738375	.	.	.	.
chr3R	27073824	27073825	.	.	.	.
chr3R	27526592	27526593	.	.	.	.
chr2R	1664031	1664032	.	.	.	.
chr2R	2460906	2460907	.	.	.	.
chr2R	2519892	2519893	.	.	.	.
chr2R	3027419	3027420	CG12172-RA	.	.	.
chr2R	4174753	4174754	.	.	.	.
chr2R	4794834	4794835	.	.	.	.
chr2R	5466468	5466469	.	.	.	.
chr2R	6356063	6356064	.	.	.	.
chr2R	6422852	6422853	CG12052-RA	.	.	.
chr2R	6731669	6731670	CG30015-RD	.	.	.
chr2R	7872908	7872909	.	.	.	.
chr2R	8027994	8027995	.	.	.	.
chr2R	8521088	8521089	.	.	.	.
chr2R	8664416	8664417	CG17579-RB	.	.	.
chr2R	8844027	8844028	.	.	.	.
chr2R	8873303	8873304	.	.	.	.
chr2R	8879182	8879183	.	.	.	.
chr2R	9046051	9046052	CG4007-RA	.	.	.
chr2R	9055443	9055444	CG4007-RA	.	.	.
chr2R	9076973	9076974	.	.	.	.
chr2R	9359644	9359645	.	.	.	.
chr2R	9448207	9448208	CG13333-RA	.	.	.
chr2R	9449139	9449140	CG13333-RA	.	.	.
chr2R	9450928	9450929	CG13333-RA	.	.	.
chr2R	9451313	9451314	CG13333-RA	.	.	.
chr2R	9452219	9452220	CG13333-RA	.	.	.
chr2R	9453851	9453852	.	.	.	.
chr2R	9454414	9454415	.	.	.	.
chr2R	9455002	9455003	.	.	.	.
chr2R	9456467	9456468	.	.	.	.
chr2R	9457795	9457796	.	.	.	.
chr2R	9741907	9741908	.	.	.	.
chr2R	10061749	10061750	.	.	.	.
chr2R	10062329	10062330	.	.	.	.
chr2R	10064420	10064421	.	.	.	.
chr2R	10158140	10158141	CG8547-RB	.	.	.
chr2R	10299285	10299286	.	.	.	.
chr2R	10391472	10391473	.	.	.	.
chr2R	10506289	10506290	.	.	.	.
chr2R	10639728	10639729	.	.	.	.
chr2R	10950240	10950241	.	.	.	.
chr2R	11209738	11209739	.	.	.	.
chr2R	11778476	11778477	.	.	.	.
chr2R	11785740	11785741	.	.	.	.
chr2R	11788189	11788190	.	.	.	.
chr2R	13030736	13030737	.	.	.	.
chr2R	13553220	13553221	.	.	.	.
chr2R	13683510	13683511	.	.	.	.
chr2R	13739162	13739163	.	.	.	.
chr2R	14047955	14047956	.	.	.	.
chr2R	14082204	14082205	.	.	.	.
chr2R	14098482	14098483	.	.	.	.
chr2R	14164866	14164867	.	.	.	.
chr2R	14453268	14453269	.	.	.	.
chr2R	14690275	14690276	FlyExpress_l(2)08717	FlyExpress_CG15094	.	.
chr2R	14734252	14734253	.	.	.	.
chr2R	14844604	14844605	.	.	.	.
chr2R	14947727	14947728	.	.	.	.
chr2R	15150183	15150184	.	.	.	.
chr2R	15518675	15518676	.	.	.	.
chr2R	15728374	15728375	.	.	.	.
chr2R	15994011	15994012	.	.	.	.
chr2R	16087639	16087640	.	.	.	.
chr2R	16490535	16490536	.	.	.	.
chr2R	16554970	16554971	.	.	.	.
chr2R	16555533	16555534	.	.	.	.
chr2R	16794951	16794952	.	.	.	.
chr2R	17368434	17368435	.	.	.	.
chr2R	17432976	17432977	CG10079-RB	.	.	.
chr2R	17433575	17433576	CG10079-RB	.	.	.
chr2R	17534148	17534149	CG10082-RB	.	.	.
chr2R	17578722	17578723	.	.	.	.
chr2R	18136246	18136247	.	.	.	.
chr2R	18576624	18576625	.	.	.	.
chr2R	18577388	18577389	.	.	.	.
chr2R	18690536	18690537	.	.	.	.
chr2R	18937305	18937306	.	.	.	.
chr2R	19105678	19105679	.	.	.	.
chr2R	19435556	19435557	.	.	.	.
chr2R	19866414	19866415	.	.	.	.
chr2R	19916423	19916424	.	.	.	.
chr2R	20585482	20585483	.	.	.	.
chr2R	20893720	20893721	.	.	.	.
chrX	413505	413506	.	.	.	.
chrX	484897	484898	.	.	.	.
chrX	510700	510701	.	.	.	.
chrX	981094	981095	.	.	.	.
chrX	1104078	1104079	.	.	.	.
chrX	1378278	1378279	.	.	.	.
chrX	1378784	1378785	.	.	.	.
chrX	1538304	1538305	.	.	.	.
chrX	1548972	1548973	.	.	.	.
chrX	1550627	1550628	.	.	.	.
chrX	1551815	1551816	.	.	.	.
chrX	1802230	1802231	.	.	.	.
chrX	2019750	2019751	.	.	.	.
chrX	2059839	2059840	.	.	.	.
chrX	2074954	2074955	.	.	.	.
chrX	2302818	2302819	.	.	.	.
chrX	2338006	2338007	.	.	.	.
chrX	3082003	3082004	.	.	.	.
chrX	3376808	3376809	.	.	.	.
chrX	3613940	3613941	.	.	.	.
chrX	3635007	3635008	.	.	.	.
chrX	3667163	3667164	.	.	.	.
chrX	4091362	4091363	.	.	.	.
chrX	4105354	4105355	.	.	.	.
chrX	4131823	4131824	.	.	.	.
chrX	4285092	4285093	.	.	.	.
chrX	4834546	4834547	.	.	.	.
chrX	5069200	5069201	.	.	.	.
chrX	5223552	5223553	.	.	.	.
chrX	5448283	5448284	.	.	.	.
chrX	5687687	5687688	.	.	.	.
chrX	5691871	5691872	.	.	.	.
chrX	5695132	5695133	.	.	.	.
chrX	5792861	5792862	.	.	.	.
chrX	5794691	5794692	.	.	.	.
chrX	5890843	5890844	.	.	.	.
chrX	6634179	6634180	.	.	.	.
chrX	6697722	6697723	.	.	.	.
chrX	6698240	6698241	.	.	.	.
chrX	6749997	6749998	.	.	.	.
chrX	7070076	7070077	.	.	.	.
chrX	7497958	7497959	CG11387-RA	.	.	.
chrX	7502099	7502100	CG11387-RA	.	.	.
chrX	7877427	7877428	.	.	.	.
chrX	7955508	7955509	CG2252-RC	.	.	.
chrX	8036288	8036289	.	.	.	.
chrX	8262732	8262733	.	.	.	.
chrX	8318666	8318667	.	.	.	.
chrX	8526607	8526608	.	.	.	.
chrX	8614434	8614435	.	.	.	.
chrX	8724058	8724059	.	.	.	.
chrX	8838071	8838072	.	.	.	.
chrX	9374014	9374015	.	.	.	.
chrX	9444788	9444789	.	.	.	.
chrX	9578725	9578726	CG12653-RA	.	.	.
chrX	9579800	9579801	CG12653-RA	.	.	.
chrX	9638116	9638117	.	.	.	.
chrX	9685398	9685399	.	.	.	.
chrX	10367140	10367141	.	.	.	.
chrX	10639090	10639091	.	.	.	.
chrX	10696242	10696243	.	.	.	.
chrX	11458081	11458082	.	.	.	.
chrX	11610745	11610746	.	.	.	.
chrX	11728859	11728860	.	.	.	.
chrX	12309727	12309728	.	.	.	.
chrX	12526345	12526346	.	.	.	.
chrX	12528112	12528113	.	.	.	.
chrX	12832367	12832368	CG4396-RA	.	.	.
chrX	13190962	13190963	.	.	.	.
chrX	13703043	13703044	.	.	.	.
chrX	13713564	13713565	.	.	.	.
chrX	14374203	14374204	.	.	.	.
chrX	14432703	14432704	.	.	.	.
chrX	14859988	14859989	.	.	.	.
chrX	15213463	15213464	.	.	.	.
chrX	15468634	15468635	.	.	.	.
chrX	15606607	15606608	.	.	.	.
chrX	15628177	15628178	.	.	.	.
chrX	15988240	15988241	.	.	.	.
chrX	16056046	16056047	.	.	.	.
chrX	16135998	16135999	.	.	.	.
chrX	16214680	16214681	.	.	.	.
chrX	16393563	16393564	.	.	.	.
chrX	16492925	16492926	.	.	.	.
chrX	16669520	16669521	CG9623-RB	.	.	.
chrX	17227038	17227039	.	.	.	.
chrX	17380042	17380043	.	.	.	.
chrX	17645353	17645354	.	.	.	.
chrX	17877197	17877198	.	.	.	.
chrX	18165126	18165127	.	.	.	.
chrX	18193364	18193365	.	.	.	.
chrX	18264886	18264887	.	.	.	.
chrX	18535718	18535719	.	.	.	.
chrX	19659429	19659430	.	.	.	.
chrX	20122348	20122349	.	.	.	.
chrX	20265390	20265391	.	.	.	.
chrX	21075266	21075267	.	.	.	.
chrX	21239637	21239638	.	.	.	.
chrX	21317798	21317799	.	.	.	.
chrX	21857508	21857509	.	.	.	.
chrX	21863178	21863179	.	.	.	.

## Sheet: 10kb_Peak_to_Gene
#feature.id	chr_1	start_1	end_1	dist_closest_1	chr_2	start_2	end_2	dist_closest_2	chr_3	start_3	end_3	dist_closest_3	chr_4	start_4	end_4	dist_closest_4
CG8827-RA	chr2L	13905227	13905228	417	.	.	.	.	.	.	.	.	.	.	.	.
CG33466-RA	.	.	.	.	.	.	.	.	.	.	.	.	.	.	.	.
CG16869-RA	chr2L	13905227	13905228	4412	.	.	.	.	.	.	.	.	.	.	.	.
CG3218-RA	.	.	.	.	.	.	.	.	.	.	.	.	.	.	.	.
CG8649-RD	.	.	.	.	.	.	.	.	.	.	.	.	.	.	.	.
CG1944-RA	.	.	.	.	.	.	.	.	.	.	.	.	.	.	.	.
CG1048-RA	.	.	.	.	.	.	.	.	.	.	.	.	.	.	.	.
CG13653-RA	chr3R	21021124	21021125	157	chr3R	21020626	21020627	655	.	.	.	.	.	.	.	.
CG5055-RB	chrX	17071987	17071988	8986	.	.	.	.	.	.	.	.	.	.	.	.
CG12283-RA	.	.	.	.	.	.	.	.	.	.	.	.	.	.	.	.
CG7997-RB	.	.	.	.	.	.	.	.	.	.	.	.	.	.	.	.
CG8095-RB	.	.	.	.	.	.	.	.	.	.	.	.	.	.	.	.
CG2762-RA	chr2L	523080	523081	386	chr2L	518626	518627	4840	.	.	.	.	.	.	.	.
CG18088-RA	.	.	.	.	.	.	.	.	.	.	.	.	.	.	.	.
CG5187-RA	chr3L	9012699	9012700	358	chr3L	9013891	9013892	1550	chr3L	9010275	9010276	0	.	.	.	.
CG9520-RA	.	.	.	.	.	.	.	.	.	.	.	.	.	.	.	.
CG12011-RA	.	.	.	.	.	.	.	.	.	.	.	.	.	.	.	.
CG13800-RA	chr3L	2385879	2385880	2512	.	.	.	.	.	.	.	.	.	.	.	.
CG10619-RB	chr2L	18875263	18875264	0	chr2L	18890339	18890340	9089	.	.	.	.	.	.	.	.
CG31902-RB	.	.	.	.	.	.	.	.	.	.	.	.	.	.	.	.
CG12919-RA	chr2R	5965706	5965707	163	chr2R	5964776	5964777	1093	.	.	.	.	.	.	.	.
CG5399-RA	.	.	.	.	.	.	.	.	.	.	.	.	.	.	.	.
CG8084-RA	chr2R	4958868	4958869	0	chr2R	4959563	4959564	0	.	.	.	.	.	.	.	.
CG11893-RA	.	.	.	.	.	.	.	.	.	.	.	.	.	.	.	.
CG45263-RA	chr3R	4303226	4303227	0	chr3R	4293619	4293620	0	.	.	.	.	.	.	.	.
CG13912-RA	.	.	.	.	.	.	.	.	.	.	.	.	.	.	.	.
CG33956-RD	chr3R	25590063	25590064	2433	chr3R	25596904	25596905	0	.	.	.	.	.	.	.	.
CG6394-RA	.	.	.	.	.	.	.	.	.	.	.	.	.	.	.	.
CG9446-RB	.	.	.	.	.	.	.	.	.	.	.	.	.	.	.	.
CG1046-RA	chr3R	2580238	2580239	316	chr3R	2588944	2588945	9022	.	.	.	.	.	.	.	.
CG17574-RD	.	.	.	.	.	.	.	.	.	.	.	.	.	.	.	.
CG2947-RB	.	.	.	.	.	.	.	.	.	.	.	.	.	.	.	.
CG15236-RB	.	.	.	.	.	.	.	.	.	.	.	.	.	.	.	.
CG7530-RC	.	.	.	.	.	.	.	.	.	.	.	.	.	.	.	.
CG42666-RC	.	.	.	.	.	.	.	.	.	.	.	.	.	.	.	.
CG7005-RA	.	.	.	.	.	.	.	.	.	.	.	.	.	.	.	.
CG4193-RA	.	.	.	.	.	.	.	.	.	.	.	.	.	.	.	.
CG34373-RG	chr3L	8068112	8068113	2379	chr3L	8072913	8072914	0	.	.	.	.	.	.	.	.
CG16778-RC	chr2R	20995332	20995333	9592	.	.	.	.	.	.	.	.	.	.	.	.
CG3940-RA	.	.	.	.	.	.	.	.	.	.	.	.	.	.	.	.
CG15671-RA	.	.	.	.	.	.	.	.	.	.	.	.	.	.	.	.
CG43332-RA	.	.	.	.	.	.	.	.	.	.	.	.	.	.	.	.
CG6234-RA	chr3R	8472086	8472087	1695	chr3R	8471765	8471766	2016	chr3R	8471139	8471140	2642	.	.	.	.
CG7590-RA	.	.	.	.	.	.	.	.	.	.	.	.	.	.	.	.
CG12212-RA	.	.	.	.	.	.	.	.	.	.	.	.	.	.	.	.
CG31449-RA	chr3R	8293681	8293682	180	.	.	.	.	.	.	.	.	.	.	.	.
CG5133-RA	chr3L	9034632	9034633	0	chr3L	9034243	9034244	233	chr3L	9033834	9033835	642	chr3L	9035479	9035480	0
CG5661-RA	.	.	.	.	.	.	.	.	.	.	.	.	.	.	.	.
CG42365-RA	.	.	.	.	.	.	.	.	.	.	.	.	.	.	.	.
CG31641-RC	.	.	.	.	.	.	.	.	.	.	.	.	.	.	.	.
CG30463-RC	.	.	.	.	.	.	.	.	.	.	.	.	.	.	.	.
CG8974-RA	.	.	.	.	.	.	.	.	.	.	.	.	.	.	.	.
CG5442-RA	chr2L	12436393	12436394	1733	.	.	.	.	.	.	.	.	.	.	.	.
CG5093-RA	chr3L	8998185	8998186	112	chr3L	8996581	8996582	1716	.	.	.	.	.	.	.	.
CG17524-RA	.	.	.	.	.	.	.	.	.	.	.	.	.	.	.	.
CG31462-RA	.	.	.	.	.	.	.	.	.	.	.	.	.	.	.	.
CG2674-RG	.	.	.	.	.	.	.	.	.	.	.	.	.	.	.	.
CG44774-RA	.	.	.	.	.	.	.	.	.	.	.	.	.	.	.	.
CG13654-RA	chr3R	21021124	21021125	4415	chr3R	21020626	21020627	4913	.	.	.	.	.	.	.	.
CG3206-RA	.	.	.	.	.	.	.	.	.	.	.	.	.	.	.	.
CG15162-RA	.	.	.	.	.	.	.	.	.	.	.	.	.	.	.	.
CG33300-RA	.	.	.	.	.	.	.	.	.	.	.	.	.	.	.	.
CG5014-RC	.	.	.	.	.	.	.	.	.	.	.	.	.	.	.	.
CG6753-RA	chr3R	8471139	8471140	2843	chr3R	8471765	8471766	3469	chr3R	8472086	8472087	3790	.	.	.	.
CG1916-RA	chr2R	5378382	5378383	3291	.	.	.	.	.	.	.	.	.	.	.	.
CG4421-RA	.	.	.	.	.	.	.	.	.	.	.	.	.	.	.	.
CG8448-RC	.	.	.	.	.	.	.	.	.	.	.	.	.	.	.	.
CG7995-RD	chr3L	1731131	1731132	8030	.	.	.	.	.	.	.	.	.	.	.	.
CG11164-RA	chrX	13564833	13564834	1513	.	.	.	.	.	.	.	.	.	.	.	.
CG31760-RA	.	.	.	.	.	.	.	.	.	.	.	.	.	.	.	.
CG10082-RB	chr2R	17536634	17536635	4509	chr2R	17534148	17534149	6995	.	.	.	.	.	.	.	.
CG3664-RF	.	.	.	.	.	.	.	.	.	.	.	.	.	.	.	.
CG2269-RC	chr2R	5965706	5965707	9369	.	.	.	.	.	.	.	.	.	.	.	.
CG10626-RA	.	.	.	.	.	.	.	.	.	.	.	.	.	.	.	.
CG4408-RA	.	.	.	.	.	.	.	.	.	.	.	.	.	.	.	.
CG9339-RE	.	.	.	.	.	.	.	.	.	.	.	.	.	.	.	.
CG42329-RA	.	.	.	.	.	.	.	.	.	.	.	.	.	.	.	.
CG9734-RC	.	.	.	.	.	.	.	.	.	.	.	.	.	.	.	.
CG7272-RA	.	.	.	.	.	.	.	.	.	.	.	.	.	.	.	.
CG31064-RA	chr3R	23064849	23064850	49	.	.	.	.	.	.	.	.	.	.	.	.
CG10360-RB	.	.	.	.	.	.	.	.	.	.	.	.	.	.	.	.
CG15817-RA	.	.	.	.	.	.	.	.	.	.	.	.	.	.	.	.
CG3798-RA	.	.	.	.	.	.	.	.	.	.	.	.	.	.	.	.
CG32021-RA	.	.	.	.	.	.	.	.	.	.	.	.	.	.	.	.
CG1389-RA	.	.	.	.	.	.	.	.	.	.	.	.	.	.	.	.
CG8849-RA	.	.	.	.	.	.	.	.	.	.	.	.	.	.	.	.
CG30382-RA	.	.	.	.	.	.	.	.	.	.	.	.	.	.	.	.
CG14545-RA	.	.	.	.	.	.	.	.	.	.	.	.	.	.	.	.
CG33156-RB	.	.	.	.	.	.	.	.	.	.	.	.	.	.	.	.
CG5272-RA	.	.	.	.	.	.	.	.	.	.	.	.	.	.	.	.
CG3752-RA	.	.	.	.	.	.	.	.	.	.	.	.	.	.	.	.
CG9674-RD	.	.	.	.	.	.	.	.	.	.	.	.	.	.	.	.
CG13610-RA	chr3R	20098396	20098397	356	.	.	.	.	.	.	.	.	.	.	.	.
CG5099-RB	.	.	.	.	.	.	.	.	.	.	.	.	.	.	.	.
CG8632-RA	.	.	.	.	.	.	.	.	.	.	.	.	.	.	.	.
CG7937-RA	.	.	.	.	.	.	.	.	.	.	.	.	.	.	.	.
CG8524-RB	.	.	.	.	.	.	.	.	.	.	.	.	.	.	.	.
CG3429-RA	.	.	.	.	.	.	.	.	.	.	.	.	.	.	.	.
CG32581-RB	.	.	.	.	.	.	.	.	.	.	.	.	.	.	.	.
CG4302-RA	.	.	.	.	.	.	.	.	.	.	.	.	.	.	.	.
CG8385-RH	chr3L	22856967	22856968	4511	.	.	.	.	.	.	.	.	.	.	.	.
CG15658-RA	.	.	.	.	.	.	.	.	.	.	.	.	.	.	.	.
CG10184-RA	.	.	.	.	.	.	.	.	.	.	.	.	.	.	.	.
CG32697-RA	.	.	.	.	.	.	.	.	.	.	.	.	.	.	.	.
CG6721-RA	chr3L	9848010	9848011	0	chr3L	9849000	9849001	620	.	.	.	.	.	.	.	.
CG10072-RA	.	.	.	.	.	.	.	.	.	.	.	.	.	.	.	.
CG4404-RA	.	.	.	.	.	.	.	.	.	.	.	.	.	.	.	.
CG7660-RB	.	.	.	.	.	.	.	.	.	.	.	.	.	.	.	.
CG10236-RA	.	.	.	.	.	.	.	.	.	.	.	.	.	.	.	.
CG5888-RA	.	.	.	.	.	.	.	.	.	.	.	.	.	.	.	.
CG16983-RF	.	.	.	.	.	.	.	.	.	.	.	.	.	.	.	.
CG5481-RA	chr2L	1420247	1420248	0	.	.	.	.	.	.	.	.	.	.	.	.
CG32434-RC	chr3L	21060642	21060643	345	.	.	.	.	.	.	.	.	.	.	.	.
CG2125-RA	.	.	.	.	.	.	.	.	.	.	.	.	.	.	.	.
CG17941-RA	.	.	.	.	.	.	.	.	.	.	.	.	.	.	.	.
CG8495-RC	.	.	.	.	.	.	.	.	.	.	.	.	.	.	.	.
CG34214-RA	.	.	.	.	.	.	.	.	.	.	.	.	.	.	.	.
CG12369-RB	.	.	.	.	.	.	.	.	.	.	.	.	.	.	.	.
CG9075-RB	.	.	.	.	.	.	.	.	.	.	.	.	.	.	.	.
CG3938-RB	chr2L	15732174	15732175	394	.	.	.	.	.	.	.	.	.	.	.	.
CG12028-RA	.	.	.	.	.	.	.	.	.	.	.	.	.	.	.	.
CG11849-RA	chr3R	21020626	21020627	2106	.	.	.	.	.	.	.	.	.	.	.	.
CG17348-RA	.	.	.	.	.	.	.	.	.	.	.	.	.	.	.	.
CG18412-RA	.	.	.	.	.	.	.	.	.	.	.	.	.	.	.	.
CG7649-RB	.	.	.	.	.	.	.	.	.	.	.	.	.	.	.	.
CG13333-RA	chr2R	9448207	9448208	3359	chr2R	9449139	9449140	4291	chr2R	9450928	9450929	6080	chr2R	9451313	9451314	6465
CG3423-RA	.	.	.	.	.	.	.	.	.	.	.	.	.	.	.	.
CG14025-RC	.	.	.	.	.	.	.	.	.	.	.	.	.	.	.	.
CG15010-RA	chr3L	4252359	4252360	239	chr3L	4253025	4253026	905	.	.	.	.	.	.	.	.
CG3048-RA	.	.	.	.	.	.	.	.	.	.	.	.	.	.	.	.
CG34137-RA	.	.	.	.	.	.	.	.	.	.	.	.	.	.	.	.
CG3166-RB	.	.	.	.	.	.	.	.	.	.	.	.	.	.	.	.
CG1691-RF	chrX	10716877	10716878	67	.	.	.	.	.	.	.	.	.	.	.	.
CG15288-RB	chr2L	14261982	14261983	1539	.	.	.	.	.	.	.	.	.	.	.	.
CG33232-RC	.	.	.	.	.	.	.	.	.	.	.	.	.	.	.	.
CG6868-RA	.	.	.	.	.	.	.	.	.	.	.	.	.	.	.	.
CG4922-RA	.	.	.	.	.	.	.	.	.	.	.	.	.	.	.	.
CG3779-RA	chr2L	9449326	9449327	503	.	.	.	.	.	.	.	.	.	.	.	.
CG31531-RB	.	.	.	.	.	.	.	.	.	.	.	.	.	.	.	.
CG7271-RA	.	.	.	.	.	.	.	.	.	.	.	.	.	.	.	.
CG34383-RC	.	.	.	.	.	.	.	.	.	.	.	.	.	.	.	.
CG9775-RC	.	.	.	.	.	.	.	.	.	.	.	.	.	.	.	.
CG3322-RA	.	.	.	.	.	.	.	.	.	.	.	.	.	.	.	.
CG31607-RA	.	.	.	.	.	.	.	.	.	.	.	.	.	.	.	.
CG18255-RD	.	.	.	.	.	.	.	.	.	.	.	.	.	.	.	.
CG10293-RC	.	.	.	.	.	.	.	.	.	.	.	.	.	.	.	.
CG10079-RB	chr2R	17433575	17433576	1498	chr2R	17432976	17432977	2097	.	.	.	.	.	.	.	.
CG12082-RA	.	.	.	.	.	.	.	.	.	.	.	.	.	.	.	.
CG4216-RA	.	.	.	.	.	.	.	.	.	.	.	.	.	.	.	.
CG11851-RA	.	.	.	.	.	.	.	.	.	.	.	.	.	.	.	.
CG18111-RA	.	.	.	.	.	.	.	.	.	.	.	.	.	.	.	.
CG42278-RC	.	.	.	.	.	.	.	.	.	.	.	.	.	.	.	.
CG2252-RC	chrX	7955508	7955509	38	.	.	.	.	.	.	.	.	.	.	.	.
CG31317-RA	.	.	.	.	.	.	.	.	.	.	.	.	.	.	.	.
CG11988-RA	chr3R	4856038	4856039	0	chr3R	4865231	4865232	5781	.	.	.	.	.	.	.	.
CG8434-RA	chr2R	12047621	12047622	4230	.	.	.	.	.	.	.	.	.	.	.	.
CG7540-RA	.	.	.	.	.	.	.	.	.	.	.	.	.	.	.	.
CG14080-RB	.	.	.	.	.	.	.	.	.	.	.	.	.	.	.	.
CG3424-RA	.	.	.	.	.	.	.	.	.	.	.	.	.	.	.	.
CG33196-RC	chr2L	4597833	4597834	5869	.	.	.	.	.	.	.	.	.	.	.	.
CG14985-RB	.	.	.	.	.	.	.	.	.	.	.	.	.	.	.	.
CG30023-RA	.	.	.	.	.	.	.	.	.	.	.	.	.	.	.	.
CG13651-RA	.	.	.	.	.	.	.	.	.	.	.	.	.	.	.	.
CG3502-RB	.	.	.	.	.	.	.	.	.	.	.	.	.	.	.	.
CG32227-RA	.	.	.	.	.	.	.	.	.	.	.	.	.	.	.	.
CG7250-RA	chr3L	15323700	15323701	6099	.	.	.	.	.	.	.	.	.	.	.	.
CG8654-RA	.	.	.	.	.	.	.	.	.	.	.	.	.	.	.	.
CG30015-RD	chr2R	6731669	6731670	140	.	.	.	.	.	.	.	.	.	.	.	.
CG33868-RA	.	.	.	.	.	.	.	.	.	.	.	.	.	.	.	.
CG13425-RB	.	.	.	.	.	.	.	.	.	.	.	.	.	.	.	.
CG8384-RA	chr3R	21868052	21868053	0	chr3R	21868630	21868631	0	.	.	.	.	.	.	.	.
CG11949-RA	.	.	.	.	.	.	.	.	.	.	.	.	.	.	.	.
CG14938-RD	chr2L	11807159	11807160	0	.	.	.	.	.	.	.	.	.	.	.	.
CG3937-RB	.	.	.	.	.	.	.	.	.	.	.	.	.	.	.	.
CG32062-RG	.	.	.	.	.	.	.	.	.	.	.	.	.	.	.	.
CG6885-RA	.	.	.	.	.	.	.	.	.	.	.	.	.	.	.	.
CG9623-RB	chrX	16669520	16669521	0	.	.	.	.	.	.	.	.	.	.	.	.
CG4702-RA	chr3R	7954458	7954459	538	.	.	.	.	.	.	.	.	.	.	.	.
CG17579-RB	chr2R	8664416	8664417	3632	.	.	.	.	.	.	.	.	.	.	.	.
CG17894-RB	.	.	.	.	.	.	.	.	.	.	.	.	.	.	.	.
CG2028-RC	chrX	12548561	12548562	211	chrX	12557719	12557720	6419	.	.	.	.	.	.	.	.
CG9326-RC	.	.	.	.	.	.	.	.	.	.	.	.	.	.	.	.
CG17117-RE	chr3R	6469293	6469294	4906	.	.	.	.	.	.	.	.	.	.	.	.
CG17510-RA	.	.	.	.	.	.	.	.	.	.	.	.	.	.	.	.
CG8595-RA	.	.	.	.	.	.	.	.	.	.	.	.	.	.	.	.
CG31721-RA	.	.	.	.	.	.	.	.	.	.	.	.	.	.	.	.
CG1374-RA	.	.	.	.	.	.	.	.	.	.	.	.	.	.	.	.
CG12908-RA	.	.	.	.	.	.	.	.	.	.	.	.	.	.	.	.
CG1915-RC	.	.	.	.	.	.	.	.	.	.	.	.	.	.	.	.
CG2986-RE	.	.	.	.	.	.	.	.	.	.	.	.	.	.	.	.
CG17131-RB	.	.	.	.	.	.	.	.	.	.	.	.	.	.	.	.
CG10112-RA	.	.	.	.	.	.	.	.	.	.	.	.	.	.	.	.
CG5080-RB	.	.	.	.	.	.	.	.	.	.	.	.	.	.	.	.
CG10287-RA	.	.	.	.	.	.	.	.	.	.	.	.	.	.	.	.
CG7884-RA	.	.	.	.	.	.	.	.	.	.	.	.	.	.	.	.
CG3851-RA	.	.	.	.	.	.	.	.	.	.	.	.	.	.	.	.
CG30080-RA	.	.	.	.	.	.	.	.	.	.	.	.	.	.	.	.
CG3625-RB	.	.	.	.	.	.	.	.	.	.	.	.	.	.	.	.
CG1897-RA	chr3R	25373766	25373767	8342	.	.	.	.	.	.	.	.	.	.	.	.
CG3388-RA	chr2R	20944710	20944711	4792	.	.	.	.	.	.	.	.	.	.	.	.
CG32019-RE	.	.	.	.	.	.	.	.	.	.	.	.	.	.	.	.
CG5899-RB	.	.	.	.	.	.	.	.	.	.	.	.	.	.	.	.
CG12052-RA	chr2R	6422852	6422853	317	.	.	.	.	.	.	.	.	.	.	.	.
CG10521-RA	chrX	14643192	14643193	0	chrX	14642747	14642748	0	.	.	.	.	.	.	.	.
CG10067-RA	.	.	.	.	.	.	.	.	.	.	.	.	.	.	.	.
CG5779-RA	.	.	.	.	.	.	.	.	.	.	.	.	.	.	.	.
CG31020-RA	.	.	.	.	.	.	.	.	.	.	.	.	.	.	.	.
CG11527-RA	.	.	.	.	.	.	.	.	.	.	.	.	.	.	.	.
CG12653-RA	chrX	9580547	9580548	7673	chrX	9579800	9579801	8420	chrX	9578725	9578726	9495	.	.	.	.
CG8799-RA	.	.	.	.	.	.	.	.	.	.	.	.	.	.	.	.
CG34379-RD	.	.	.	.	.	.	.	.	.	.	.	.	.	.	.	.
CG1056-RB	.	.	.	.	.	.	.	.	.	.	.	.	.	.	.	.
CG12443-RA	.	.	.	.	.	.	.	.	.	.	.	.	.	.	.	.
CG31666-RD	.	.	.	.	.	.	.	.	.	.	.	.	.	.	.	.
CG2264-RB	chr2R	5943941	5943942	394	chr2R	5945423	5945424	0	chr2R	5943172	5943173	1163	.	.	.	.
CG12296-RA	chr3L	11003521	11003522	1601	.	.	.	.	.	.	.	.	.	.	.	.
CG1934-RA	.	.	.	.	.	.	.	.	.	.	.	.	.	.	.	.
CG4158-RA	.	.	.	.	.	.	.	.	.	.	.	.	.	.	.	.
CG11069-RA	.	.	.	.	.	.	.	.	.	.	.	.	.	.	.	.
CG4898-RB	chr3R	11106611	11106612	642	.	.	.	.	.	.	.	.	.	.	.	.
CG18024-RA	chr2L	8825446	8825447	178	chr2L	8832489	8832490	2818	.	.	.	.	.	.	.	.
CG17046-RC	.	.	.	.	.	.	.	.	.	.	.	.	.	.	.	.
CG9689-RA	.	.	.	.	.	.	.	.	.	.	.	.	.	.	.	.
CG33103-RC	.	.	.	.	.	.	.	.	.	.	.	.	.	.	.	.
CG3401-RA	.	.	.	.	.	.	.	.	.	.	.	.	.	.	.	.
CG1244-RB	.	.	.	.	.	.	.	.	.	.	.	.	.	.	.	.
CG12063-RA	.	.	.	.	.	.	.	.	.	.	.	.	.	.	.	.
CG9628-RB	chr3L	14625246	14625247	3976	chr3L	14625532	14625533	4262	.	.	.	.	.	.	.	.
CG10717-RA	chr3L	13371495	13371496	4371	.	.	.	.	.	.	.	.	.	.	.	.
CG31045-RF	chr3R	11924492	11924493	5222	chr3R	11925615	11925616	6345	.	.	.	.	.	.	.	.
CG9653-RA	chrX	7201745	7201746	228	chrX	7200186	7200187	1787	chrX	7195399	7195400	6574	chrX	7193930	7193931	8043
CG10325-RA	.	.	.	.	.	.	.	.	.	.	.	.	.	.	.	.
CG9073-RA	.	.	.	.	.	.	.	.	.	.	.	.	.	.	.	.
CG33555-RG	chr3R	10645567	10645568	0	chr3R	10643813	10643814	0	.	.	.	.	.	.	.	.
CG4844-RA	.	.	.	.	.	.	.	.	.	.	.	.	.	.	.	.
CG10037-RA	.	.	.	.	.	.	.	.	.	.	.	.	.	.	.	.
CG6634-RA	chr2L	5461641	5461642	0	chr2L	5461323	5461324	317	chr2L	5458760	5458761	2880	.	.	.	.
CG3254-RA	.	.	.	.	.	.	.	.	.	.	.	.	.	.	.	.
CG2184-RB	.	.	.	.	.	.	.	.	.	.	.	.	.	.	.	.
CG4007-RA	chr2R	9046051	9046052	1191	chr2R	9055443	9055444	5108	.	.	.	.	.	.	.	.
CG9224-RA	.	.	.	.	.	.	.	.	.	.	.	.	.	.	.	.
CG33183-RA	.	.	.	.	.	.	.	.	.	.	.	.	.	.	.	.
CG10719-RC	chr2L	19161472	19161473	6094	chr2L	19158746	19158747	8820	.	.	.	.	.	.	.	.
CG2049-RG	.	.	.	.	.	.	.	.	.	.	.	.	.	.	.	.
CG11895-RA	.	.	.	.	.	.	.	.	.	.	.	.	.	.	.	.
CG7178-RA	.	.	.	.	.	.	.	.	.	.	.	.	.	.	.	.
CG2330-RA	.	.	.	.	.	.	.	.	.	.	.	.	.	.	.	.
CG1856-RA	.	.	.	.	.	.	.	.	.	.	.	.	.	.	.	.
CG11387-RA	chrX	7502099	7502100	1081	chrX	7497958	7497959	5222	.	.	.	.	.	.	.	.
CG18290-RA	.	.	.	.	.	.	.	.	.	.	.	.	.	.	.	.
CG14351-RA	.	.	.	.	.	.	.	.	.	.	.	.	.	.	.	.
CG15098-RA	.	.	.	.	.	.	.	.	.	.	.	.	.	.	.	.
CG9491-RC	chr2L	6323901	6323902	0	.	.	.	.	.	.	.	.	.	.	.	.
CG13194-RB	chr2R	7604164	7604165	0	.	.	.	.	.	.	.	.	.	.	.	.
CG3108-RA	.	.	.	.	.	.	.	.	.	.	.	.	.	.	.	.
CG12311-RA	.	.	.	.	.	.	.	.	.	.	.	.	.	.	.	.
CG13920-RA	.	.	.	.	.	.	.	.	.	.	.	.	.	.	.	.
CG17228-RF	chr3R	7198188	7198189	0	chr3R	7198573	7198574	0	chr3R	7204381	7204382	0	.	.	.	.
CG4396-RA	chrX	12832367	12832368	233	.	.	.	.	.	.	.	.	.	.	.	.
CG31300-RA	.	.	.	.	.	.	.	.	.	.	.	.	.	.	.	.
CG1151-RA	.	.	.	.	.	.	.	.	.	.	.	.	.	.	.	.
CG7756-RA	.	.	.	.	.	.	.	.	.	.	.	.	.	.	.	.
CG5191-RC	.	.	.	.	.	.	.	.	.	.	.	.	.	.	.	.
CG1153-RA	.	.	.	.	.	.	.	.	.	.	.	.	.	.	.	.
CG17420-RD	.	.	.	.	.	.	.	.	.	.	.	.	.	.	.	.
CG7675-RA	.	.	.	.	.	.	.	.	.	.	.	.	.	.	.	.
CG8193-RA	.	.	.	.	.	.	.	.	.	.	.	.	.	.	.	.
CG1130-RA	.	.	.	.	.	.	.	.	.	.	.	.	.	.	.	.
CG12172-RA	chr2R	3027419	3027420	7783	.	.	.	.	.	.	.	.	.	.	.	.
CG8376-RA	.	.	.	.	.	.	.	.	.	.	.	.	.	.	.	.
CG5596-RB	.	.	.	.	.	.	.	.	.	.	.	.	.	.	.	.
CG15282-RA	.	.	.	.	.	.	.	.	.	.	.	.	.	.	.	.
CG32491-RG	chr3R	17199263	17199264	0	.	.	.	.	.	.	.	.	.	.	.	.
CG9611-RE	.	.	.	.	.	.	.	.	.	.	.	.	.	.	.	.
CG17927-RD	.	.	.	.	.	.	.	.	.	.	.	.	.	.	.	.
CG2666-RB	.	.	.	.	.	.	.	.	.	.	.	.	.	.	.	.
CG32209-RB	.	.	.	.	.	.	.	.	.	.	.	.	.	.	.	.
CG18507-RB	.	.	.	.	.	.	.	.	.	.	.	.	.	.	.	.
CG7225-RA	.	.	.	.	.	.	.	.	.	.	.	.	.	.	.	.
CG13906-RA	chr3L	900525	900526	8613	.	.	.	.	.	.	.	.	.	.	.	.
CG6883-RA	chr3L	378266	378267	949	.	.	.	.	.	.	.	.	.	.	.	.
CG34416-RN	.	.	.	.	.	.	.	.	.	.	.	.	.	.	.	.
CG30413-RA	.	.	.	.	.	.	.	.	.	.	.	.	.	.	.	.
CG18783-RB	chr2L	6088479	6088480	2937	.	.	.	.	.	.	.	.	.	.	.	.
CG14470-RA	.	.	.	.	.	.	.	.	.	.	.	.	.	.	.	.
CG31813-RA	.	.	.	.	.	.	.	.	.	.	.	.	.	.	.	.
CG12210-RA	.	.	.	.	.	.	.	.	.	.	.	.	.	.	.	.
CG11049-RG	.	.	.	.	.	.	.	.	.	.	.	.	.	.	.	.
CG4467-RA	.	.	.	.	.	.	.	.	.	.	.	.	.	.	.	.
CG9660-RE	.	.	.	.	.	.	.	.	.	.	.	.	.	.	.	.
CG10382-RA	.	.	.	.	.	.	.	.	.	.	.	.	.	.	.	.
CG32150-RA	.	.	.	.	.	.	.	.	.	.	.	.	.	.	.	.
CG7526-RC	.	.	.	.	.	.	.	.	.	.	.	.	.	.	.	.
CG8587-RA	.	.	.	.	.	.	.	.	.	.	.	.	.	.	.	.
CG1342-RA	.	.	.	.	.	.	.	.	.	.	.	.	.	.	.	.
CG10591-RA	chr3L	5597381	5597382	4591	.	.	.	.	.	.	.	.	.	.	.	.
CG1157-RA	.	.	.	.	.	.	.	.	.	.	.	.	.	.	.	.
CG33715-RB	.	.	.	.	.	.	.	.	.	.	.	.	.	.	.	.
CG9614-RM	.	.	.	.	.	.	.	.	.	.	.	.	.	.	.	.
CG7816-RD	.	.	.	.	.	.	.	.	.	.	.	.	.	.	.	.
CG7283-RC	.	.	.	.	.	.	.	.	.	.	.	.	.	.	.	.
CG42684-RD	.	.	.	.	.	.	.	.	.	.	.	.	.	.	.	.
CG40263-RA	.	.	.	.	.	.	.	.	.	.	.	.	.	.	.	.
CG6024-RD	.	.	.	.	.	.	.	.	.	.	.	.	.	.	.	.
CG8493-RB	.	.	.	.	.	.	.	.	.	.	.	.	.	.	.	.
CG14253-RB	.	.	.	.	.	.	.	.	.	.	.	.	.	.	.	.
CG13377-RA	.	.	.	.	.	.	.	.	.	.	.	.	.	.	.	.
CG6611-RC	.	.	.	.	.	.	.	.	.	.	.	.	.	.	.	.
CG7847-RB	.	.	.	.	.	.	.	.	.	.	.	.	.	.	.	.
CG9828-RB	.	.	.	.	.	.	.	.	.	.	.	.	.	.	.	.
CG15013-RA	.	.	.	.	.	.	.	.	.	.	.	.	.	.	.	.
CG9184-RA	.	.	.	.	.	.	.	.	.	.	.	.	.	.	.	.
CG6434-RA	.	.	.	.	.	.	.	.	.	.	.	.	.	.	.	.
CG31997-RA	.	.	.	.	.	.	.	.	.	.	.	.	.	.	.	.
CG13159-RA	.	.	.	.	.	.	.	.	.	.	.	.	.	.	.	.
CG32031-RC	chr3L	9037074	9037075	4887	chr3L	9035479	9035480	6482	.	.	.	.	.	.	.	.
CG8547-RB	chr2R	10158140	10158141	3020	.	.	.	.	.	.	.	.	.	.	.	.
CG15822-RB	.	.	.	.	.	.	.	.	.	.	.	.	.	.	.	.
CG17888-RF	.	.	.	.	.	.	.	.	.	.	.	.	.	.	.	.
CG3114-RH	.	.	.	.	.	.	.	.	.	.	.	.	.	.	.	.
CG3153-RA	.	.	.	.	.	.	.	.	.	.	.	.	.	.	.	.
CG17800-RBB	.	.	.	.	.	.	.	.	.	.	.	.	.	.	.	.
CG13475-RA	.	.	.	.	.	.	.	.	.	.	.	.	.	.	.	.
CG7047-RB	.	.	.	.	.	.	.	.	.	.	.	.	.	.	.	.
CG11502-RC	.	.	.	.	.	.	.	.	.	.	.	.	.	.	.	.
CG42280-RE	.	.	.	.	.	.	.	.	.	.	.	.	.	.	.	.
CG18004-RC	.	.	.	.	.	.	.	.	.	.	.	.	.	.	.	.
CG32490-RL	.	.	.	.	.	.	.	.	.	.	.	.	.	.	.	.
CG9739-RD	.	.	.	.	.	.	.	.	.	.	.	.	.	.	.	.
CG15427-RC	.	.	.	.	.	.	.	.	.	.	.	.	.	.	.	.
CG33991-RB	.	.	.	.	.	.	.	.	.	.	.	.	.	.	.	.
FlyExpress_Salm	chr2L	11445995	11445996	381	chr2L	11447798	11447799	2184	chr2L	11450691	11450692	5077	.	.	.	.
FlyExpress_Bun	.	.	.	.	.	.	.	.	.	.	.	.	.	.	.	.
FlyExpress_CG15480	chr2L	13225403	13225404	197	chr2L	13227215	13227216	2009	.	.	.	.	.	.	.	.
FlyExpress_Su(H)	chr2L	15039353	15039354	134	chr2L	15038932	15038933	555	.	.	.	.	.	.	.	.
FlyExpress_Kel	.	.	.	.	.	.	.	.	.	.	.	.	.	.	.	.
FlyExpress_cad	chr2L	20770527	20770528	203	.	.	.	.	.	.	.	.	.	.	.	.
FlyExpress_atet	.	.	.	.	.	.	.	.	.	.	.	.	.	.	.	.
FlyExpress_Rapgap1	.	.	.	.	.	.	.	.	.	.	.	.	.	.	.	.
FlyExpress_net	chr2L	89353	89354	1971	chr2L	91520	91521	4138	chr2L	91988	91989	4606	.	.	.	.
FlyExpress_Scat	.	.	.	.	.	.	.	.	.	.	.	.	.	.	.	.
Flyexpress_cyp310a1	.	.	.	.	.	.	.	.	.	.	.	.	.	.	.	.
FlyExpress_CG15094	chr2R	14690275	14690276	6092	.	.	.	.	.	.	.	.	.	.	.	.
FlyExpress_l(2)08717	chr2R	14690275	14690276	0	.	.	.	.	.	.	.	.	.	.	.	.
FlyExpress_CG5532	.	.	.	.	.	.	.	.	.	.	.	.	.	.	.	.
FlyExpress_CG2915	.	.	.	.	.	.	.	.	.	.	.	.	.	.	.	.
FlyExpress_Dap	chr2R	5602192	5602193	0	.	.	.	.	.	.	.	.	.	.	.	.
FlyExpress_inv	.	.	.	.	.	.	.	.	.	.	.	.	.	.	.	.
FlyExpress_Chrb	.	.	.	.	.	.	.	.	.	.	.	.	.	.	.	.
FlyExpress_CG9238	chr3L	14540178	14540179	0	.	.	.	.	.	.	.	.	.	.	.	.
FlyExpress_aos	chr3L	16484426	16484427	7676	chr3L	16468980	16468981	0	.	.	.	.	.	.	.	.
FlyExpress_CG2162	chr3L	3037895	3037896	0	.	.	.	.	.	.	.	.	.	.	.	.
FlyExpress_CG10479	chr3L	5975099	5975100	5992	chr3L	5976170	5976171	7063	chr3L	5976279	5976280	7172	.	.	.	.
FlyExpress_Dl	chr3R	15158054	15158055	6115	.	.	.	.	.	.	.	.	.	.	.	.
FlyExpress_bnl	.	.	.	.	.	.	.	.	.	.	.	.	.	.	.	.
FlyExpress_CG33099	chr3R	18353595	18353596	1046	.	.	.	.	.	.	.	.	.	.	.	.
FlyExpress_e(spl)m5-HLH	chr3R	21856502	21856503	1045	.	.	.	.	.	.	.	.	.	.	.	.
FlyExpress_Ama	chr3R	2588944	2588945	0	chr3R	2580238	2580239	8076	.	.	.	.	.	.	.	.
FlyExpress_CG11966	.	.	.	.	.	.	.	.	.	.	.	.	.	.	.	.
FlyExpress_CG12420	.	.	.	.	.	.	.	.	.	.	.	.	.	.	.	.
FlyExpress_yellow-e3	.	.	.	.	.	.	.	.	.	.	.	.	.	.	.	.
FlyExpress_mew	.	.	.	.	.	.	.	.	.	.	.	.	.	.	.	.
FlyExpress_rst	chrX	2876668	2876669	8803	.	.	.	.	.	.	.	.	.	.	.	.

## Sheet: 20kb_Gene_to_Peak
#chr	start	end	feature.id_1	feature.id_2	feature.id_3	feature.id_4
chr2R	4959563	4959564	CG8084-RA	.	.	.
chr3R	12882217	12882218	.	.	.	.
chr2R	7084865	7084866	.	.	.	.
chr2L	8846878	8846879	.	.	.	.
chr3L	14143549	14143550	.	.	.	.
chr2L	8872575	8872576	.	.	.	.
chrX	7201745	7201746	CG9653-RA	.	.	.
chr3L	12642288	12642289	.	.	.	.
chr3L	900525	900526	CG13906-RA	.	.	.
chr3R	11925615	11925616	CG31045-RF	.	.	.
chr2L	518626	518627	CG2762-RA	.	.	.
chrX	7216230	7216231	CG9653-RA	.	.	.
chr2L	9146490	9146491	.	.	.	.
chr3L	14145113	14145114	.	.	.	.
chrX	7215050	7215051	CG9653-RA	.	.	.
chr3L	744524	744525	.	.	.	.
chr2R	5943941	5943942	CG2264-RB	.	.	.
chr3L	15032667	15032668	.	.	.	.
chrX	7187612	7187613	CG9653-RA	.	.	.
chr3L	14958126	14958127	.	.	.	.
chr3R	11244147	11244148	.	.	.	.
chr2R	7086553	7086554	.	.	.	.
chr2L	8842031	8842032	CG18024-RA	.	.	.
chr2L	20204591	20204592	.	.	.	.
chr2L	8849388	8849389	.	.	.	.
chr2L	19575963	19575964	.	.	.	.
chr3R	17431466	17431467	.	.	.	.
chr3L	699499	699500	.	.	.	.
chrX	7193930	7193931	CG9653-RA	.	.	.
chrX	5590793	5590794	.	.	.	.
chr2R	4958868	4958869	CG8084-RA	.	.	.
chr2L	91520	91521	FlyExpress_net	CG2674-RG	.	.
chr2L	12666270	12666271	.	.	.	.
chr2L	18895473	18895474	CG10619-RB	.	.	.
chr2R	5964776	5964777	CG12919-RA	CG2269-RC	.	.
chr3R	21472938	21472939	.	.	.	.
chr3L	21269968	21269969	.	.	.	.
chr3L	640490	640491	.	.	.	.
chr3L	14445769	14445770	.	.	.	.
chrX	8188244	8188245	.	.	.	.
chr3L	5849766	5849767	.	.	.	.
chr2L	249243	249244	.	.	.	.
chr2L	8876062	8876063	.	.	.	.
chr3R	2636547	2636548	.	.	.	.
chr3R	2588944	2588945	FlyExpress_Ama	CG1046-RA	CG1048-RA	.
chr2L	8416931	8416932	.	.	.	.
chr2L	13225403	13225404	FlyExpress_CG15480	.	.	.
chr3R	11854359	11854360	.	.	.	.
chr3L	18214359	18214360	.	.	.	.
chr3R	3467989	3467990	.	.	.	.
chr2L	20822813	20822814	.	.	.	.
chr3L	9849000	9849001	CG6721-RA	.	.	.
chr3R	3938777	3938778	.	.	.	.
chr3L	16171819	16171820	.	.	.	.
chr3R	5154744	5154745	.	.	.	.
chr3R	19712439	19712440	.	.	.	.
chr3R	397155	397156	.	.	.	.
chr2L	8825446	8825447	CG18024-RA	.	.	.
chr3R	25133011	25133012	.	.	.	.
chr3L	9032270	9032271	CG5133-RA	CG32031-RC	CG5187-RA	.
chr3L	11686023	11686024	.	.	.	.
chr2R	5943172	5943173	CG2264-RB	.	.	.
chr3R	2916973	2916974	.	.	.	.
chrX	17262828	17262829	.	.	.	.
chr3L	162070	162071	CG7047-RB	.	.	.
chr3R	5960211	5960212	.	.	.	.
chrX	12548561	12548562	CG2028-RC	.	.	.
chr3R	2934263	2934264	.	.	.	.
chr3L	14950036	14950037	.	.	.	.
chr2R	5378382	5378383	CG1916-RA	.	.	.
chr3R	16118438	16118439	.	.	.	.
chr3R	25373766	25373767	CG1897-RA	.	.	.
chr3R	11246479	11246480	.	.	.	.
chr2R	9467441	9467442	.	.	.	.
chrX	7195399	7195400	CG9653-RA	.	.	.
chr2L	19161472	19161473	CG10719-RC	.	.	.
chr3L	7903514	7903515	.	.	.	.
chr2R	6470052	6470053	.	.	.	.
chrX	21858561	21858562	.	.	.	.
chr3R	6442739	6442740	.	.	.	.
chr3L	8996581	8996582	CG5093-RA	CG5187-RA	.	.
chrX	19660005	19660006	.	.	.	.
chr2R	20944710	20944711	CG3388-RA	.	.	.
chr3R	21856502	21856503	FlyExpress_e(spl)m5-HLH	CG8384-RA	.	.
chr2R	11017260	11017261	.	.	.	.
chr2R	6470932	6470933	.	.	.	.
chrX	5793939	5793940	.	.	.	.
chr2L	11447798	11447799	FlyExpress_Salm	.	.	.
chrX	19192424	19192425	.	.	.	.
chr2L	2451128	2451129	.	.	.	.
chr2R	17536634	17536635	CG10082-RB	CG42365-RA	.	.
chr2R	8846263	8846264	.	.	.	.
chr2R	5945423	5945424	CG2264-RB	.	.	.
chr2L	21629319	21629320	.	.	.	.
chr2L	2454829	2454830	.	.	.	.
chr3L	9035479	9035480	CG5133-RA	CG32031-RC	.	.
chrX	8307084	8307085	.	.	.	.
chr3L	9033834	9033835	CG5133-RA	CG32031-RC	.	.
chr2R	17252224	17252225	CG15671-RA	.	.	.
chr3R	17273421	17273422	.	.	.	.
chrX	7186407	7186408	CG9653-RA	.	.	.
chr2L	12011953	12011954	.	.	.	.
chrX	5641219	5641220	.	.	.	.
chr2R	19094615	19094616	.	.	.	.
chr3L	2385879	2385880	CG13800-RA	.	.	.
chr3L	6760307	6760308	.	.	.	.
chr2L	8841513	8841514	CG18024-RA	.	.	.
chr2L	12007443	12007444	.	.	.	.
chr3L	5987155	5987156	FlyExpress_CG10479	.	.	.
chr3L	2438348	2438349	.	.	.	.
chr3R	2549554	2549555	.	.	.	.
chr3R	5205073	5205074	.	.	.	.
chr2R	15954265	15954266	.	.	.	.
chrX	7200186	7200187	CG9653-RA	.	.	.
chr2L	15478477	15478478	.	.	.	.
chr2L	2457153	2457154	.	.	.	.
chr2R	8883838	8883839	.	.	.	.
chr3R	24889099	24889100	.	.	.	.
chr2L	11450691	11450692	FlyExpress_Salm	.	.	.
chr3L	19901836	19901837	.	.	.	.
chrX	3671474	3671475	CG2947-RB	.	.	.
chr3R	265	266	.	.	.	.
chrX	8785925	8785926	.	.	.	.
chr3R	19169169	19169170	.	.	.	.
chr2R	5602192	5602193	FlyExpress_Dap	.	.	.
chr3R	12774464	12774465	.	.	.	.
chr3L	9037074	9037075	CG5133-RA	CG32031-RC	.	.
chr3L	9848010	9848011	CG6721-RA	.	.	.
chrX	7122990	7122991	.	.	.	.
chr2R	11015555	11015556	.	.	.	.
chr2L	6088479	6088480	CG18783-RB	CG31641-RC	.	.
chr2L	19576985	19576986	.	.	.	.
chr3L	3374188	3374189	.	.	.	.
chr3R	17442134	17442135	.	.	.	.
chr2L	11445995	11445996	FlyExpress_Salm	.	.	.
chr3L	2867746	2867747	.	.	.	.
chr3L	14961201	14961202	.	.	.	.
chr2L	13851169	13851170	.	.	.	.
chr3L	5976170	5976171	FlyExpress_CG10479	.	.	.
chr3R	16078934	16078935	.	.	.	.
chr2L	19865729	19865730	.	.	.	.
chr3L	21469834	21469835	.	.	.	.
chr2R	20995332	20995333	CG16778-RC	.	.	.
chr3L	1479189	1479190	.	.	.	.
chrX	3673905	3673906	CG2947-RB	.	.	.
chr2L	2449047	2449048	.	.	.	.
chr2L	6724456	6724457	.	.	.	.
chr2R	7079321	7079322	.	.	.	.
chr3R	25596904	25596905	CG33956-RD	.	.	.
chr3L	3037895	3037896	FlyExpress_CG2162	.	.	.
chr2R	17255140	17255141	CG15671-RA	.	.	.
chr2R	7071092	7071093	.	.	.	.
chr3R	12067209	12067210	.	.	.	.
chrX	18137619	18137620	.	.	.	.
chr3L	15038510	15038511	.	.	.	.
chr3L	8668945	8668946	.	.	.	.
chr2R	5729980	5729981	.	.	.	.
chr3R	15861864	15861865	.	.	.	.
chr3L	5850332	5850333	.	.	.	.
chr2L	18890339	18890340	CG10619-RB	.	.	.
chr3R	19555969	19555970	.	.	.	.
chr2R	8879357	8879358	.	.	.	.
chrX	6588703	6588704	.	.	.	.
chr3R	7204381	7204382	CG17228-RF	.	.	.
chr3R	25409361	25409362	.	.	.	.
chr2R	13689401	13689402	.	.	.	.
chr3L	13067575	13067576	.	.	.	.
chr3L	16484426	16484427	FlyExpress_aos	.	.	.
chr2L	6079096	6079097	CG18783-RB	.	.	.
chrX	9580547	9580548	CG12653-RA	.	.	.
chr3R	2817792	2817793	.	.	.	.
chr3L	14129104	14129105	.	.	.	.
chr2L	8365861	8365862	.	.	.	.
chrX	15780837	15780838	.	.	.	.
chr2R	15614438	15614439	.	.	.	.
chrX	7831924	7831925	.	.	.	.
chr2R	17390243	17390244	.	.	.	.
chr3R	16655690	16655691	.	.	.	.
chr2L	1954697	1954698	.	.	.	.
chr2R	17411491	17411492	.	.	.	.
chr3L	16468980	16468981	FlyExpress_aos	.	.	.
chr3R	12456538	12456539	.	.	.	.
chr3R	4293619	4293620	CG45263-RA	.	.	.
chr2R	12527682	12527683	.	.	.	.
chr3R	2892933	2892934	.	.	.	.
chr3R	15158054	15158055	FlyExpress_Dl	.	.	.
chr3L	5862838	5862839	.	.	.	.
chr2R	13709901	13709902	.	.	.	.
chr3R	18498857	18498858	.	.	.	.
chr2R	19460607	19460608	.	.	.	.
chr3L	16037005	16037006	.	.	.	.
chr3R	23468226	23468227	CG5596-RB	.	.	.
chr2R	20401610	20401611	.	.	.	.
chr2R	17362848	17362849	.	.	.	.
chr2R	7604164	7604165	CG13194-RB	.	.	.
chr2L	12010526	12010527	.	.	.	.
chr2L	2454072	2454073	.	.	.	.
chr3R	23757428	23757429	.	.	.	.
chr2R	17362357	17362358	.	.	.	.
chr3L	14139541	14139542	.	.	.	.
chrX	17683690	17683691	.	.	.	.
chrX	8936219	8936220	.	.	.	.
chr3L	698637	698638	.	.	.	.
chr2L	10056990	10056991	.	.	.	.
chrX	2359943	2359944	.	.	.	.
chr2L	481272	481273	.	.	.	.
chr3R	16369035	16369036	.	.	.	.
chr2R	2550773	2550774	.	.	.	.
chr3L	11580356	11580357	.	.	.	.
chr2R	4543280	4543281	.	.	.	.
chr3R	11494862	11494863	.	.	.	.
chr3R	4031460	4031461	.	.	.	.
chr2R	2404102	2404103	.	.	.	.
chrX	13263707	13263708	.	.	.	.
chr3L	21019622	21019623	.	.	.	.
chr2L	15319925	15319926	.	.	.	.
chrX	2879520	2879521	FlyExpress_rst	.	.	.
chr2L	19137009	19137010	.	.	.	.
chrX	12644575	12644576	.	.	.	.
chr2L	16286633	16286634	.	.	.	.
chr3R	27047079	27047080	.	.	.	.
chr2R	13935510	13935511	.	.	.	.
chr3R	15164946	15164947	FlyExpress_Dl	.	.	.
chr2R	16215512	16215513	.	.	.	.
chr2L	13235405	13235406	FlyExpress_CG15480	.	.	.
chr3R	11860019	11860020	.	.	.	.
chr2L	19324875	19324876	.	.	.	.
chrX	4317930	4317931	.	.	.	.
chr3R	12893645	12893646	.	.	.	.
chr2L	18783350	18783351	.	.	.	.
chr3R	14447047	14447048	.	.	.	.
chr2L	16859209	16859210	.	.	.	.
chr3R	12528848	12528849	.	.	.	.
chrX	9445155	9445156	.	.	.	.
chr2L	15324500	15324501	.	.	.	.
chr2L	13549170	13549171	.	.	.	.
chr3R	16118849	16118850	.	.	.	.
chrX	5584555	5584556	.	.	.	.
chr2R	8883117	8883118	.	.	.	.
chr3L	5987431	5987432	FlyExpress_CG10479	.	.	.
chr3R	4856038	4856039	CG11988-RA	.	.	.
chr3R	12229329	12229330	.	.	.	.
chr3L	9010275	9010276	CG5187-RA	CG5093-RA	.	.
chr3L	8998185	8998186	CG5093-RA	CG5187-RA	.	.
chr2L	12011095	12011096	.	.	.	.
chr3R	864836	864837	.	.	.	.
chr2R	3940305	3940306	.	.	.	.
chr2L	12461144	12461145	.	.	.	.
chr3L	16037529	16037530	.	.	.	.
chr2R	8906966	8906967	.	.	.	.
chr3R	913029	913030	.	.	.	.
chrX	19783175	19783176	.	.	.	.
chr4	717483	717484	.	.	.	.
chr3R	14814204	14814205	.	.	.	.
chr2R	20770210	20770211	.	.	.	.
chrX	16531592	16531593	.	.	.	.
chr2L	9150217	9150218	.	.	.	.
chr3R	12589628	12589629	.	.	.	.
chr3L	15037250	15037251	.	.	.	.
chr3R	12544656	12544657	.	.	.	.
chr3R	7603930	7603931	.	.	.	.
chr3L	8500377	8500378	.	.	.	.
chr3R	8471765	8471766	CG6234-RA	CG6753-RA	.	.
chrX	5795734	5795735	.	.	.	.
chr2L	7519888	7519889	.	.	.	.
chrX	16549930	16549931	.	.	.	.
chr3L	8072913	8072914	CG34373-RG	.	.	.
chr3L	2881792	2881793	.	.	.	.
chr3R	10481001	10481002	.	.	.	.
chr3R	20692751	20692752	.	.	.	.
chr3R	12887711	12887712	.	.	.	.
chr3R	21325796	21325797	CG5099-RB	.	.	.
chr2R	17250948	17250949	CG15671-RA	.	.	.
chr2R	12047621	12047622	CG8434-RA	.	.	.
chrX	12557719	12557720	CG2028-RC	.	.	.
chr3R	25111826	25111827	.	.	.	.
chrX	1128135	1128136	.	.	.	.
chr3R	14754344	14754345	.	.	.	.
chrX	2876668	2876669	FlyExpress_rst	.	.	.
chr2R	5329004	5329005	.	.	.	.
chr3L	2439248	2439249	.	.	.	.
chr2L	16601760	16601761	.	.	.	.
chrX	6716815	6716816	.	.	.	.
chr3R	10282964	10282965	.	.	.	.
chrX	17402590	17402591	.	.	.	.
chr2R	16013873	16013874	.	.	.	.
chr3R	1474298	1474299	.	.	.	.
chrX	20565158	20565159	.	.	.	.
chr3R	10679871	10679872	.	.	.	.
chrX	21239958	21239959	.	.	.	.
chr3L	319749	319750	.	.	.	.
chr2R	8872670	8872671	.	.	.	.
chr3R	7824045	7824046	.	.	.	.
chr2L	11358554	11358555	.	.	.	.
chrX	8189447	8189448	.	.	.	.
chr2L	17222440	17222441	.	.	.	.
chr3R	6783246	6783247	.	.	.	.
chr2R	19462206	19462207	.	.	.	.
chr2L	2449953	2449954	.	.	.	.
chrX	6443944	6443945	.	.	.	.
chr3R	4013330	4013331	.	.	.	.
chr3L	9034243	9034244	CG5133-RA	CG32031-RC	.	.
chr3R	19169578	19169579	.	.	.	.
chr3R	14816768	14816769	.	.	.	.
chrX	19658856	19658857	.	.	.	.
chrX	15850392	15850393	.	.	.	.
chr3R	12887385	12887386	.	.	.	.
chr3L	22260225	22260226	.	.	.	.
chrX	8569073	8569074	.	.	.	.
chr3L	14124816	14124817	.	.	.	.
chr2R	4535899	4535900	.	.	.	.
chr3R	12906836	12906837	CG3937-RB	.	.	.
chr3R	19172142	19172143	CG4408-RA	.	.	.
chr2R	18690912	18690913	.	.	.	.
chr3L	9034632	9034633	CG5133-RA	CG32031-RC	.	.
chr3L	5975099	5975100	FlyExpress_CG10479	.	.	.
chr2L	15330872	15330873	.	.	.	.
chr3L	9415795	9415796	.	.	.	.
chr2L	9602293	9602294	.	.	.	.
chr3L	22396090	22396091	.	.	.	.
chr2L	12529934	12529935	FlyExpress_Bun	.	.	.
chr3R	837	838	.	.	.	.
chrX	5589778	5589779	.	.	.	.
chr3L	21278866	21278867	.	.	.	.
chr3R	5811619	5811620	.	.	.	.
chrX	17071987	17071988	CG5055-RB	.	.	.
chr3R	1037154	1037155	.	.	.	.
chr2R	17211310	17211311	.	.	.	.
chr3R	13959655	13959656	CG7847-RB	.	.	.
chr2L	5239877	5239878	.	.	.	.
chr3L	639829	639830	.	.	.	.
chr3R	1414068	1414069	.	.	.	.
chr2L	523080	523081	CG2762-RA	.	.	.
chr2R	3918566	3918567	.	.	.	.
chr3L	4230537	4230538	.	.	.	.
chr3R	2580238	2580239	CG1046-RA	FlyExpress_Ama	CG1048-RA	.
chrX	9176840	9176841	.	.	.	.
chrX	4319122	4319123	.	.	.	.
chr2R	595299	595300	.	.	.	.
chr2L	14435949	14435950	.	.	.	.
chr3R	12378056	12378057	.	.	.	.
chrX	8189854	8189855	.	.	.	.
chr2L	5461641	5461642	CG6634-RA	.	.	.
chr2L	2945966	2945967	.	.	.	.
chr3L	762263	762264	.	.	.	.
chr2L	9121101	9121102	.	.	.	.
chr3R	1438298	1438299	.	.	.	.
chr3R	8472086	8472087	CG6234-RA	CG6753-RA	.	.
chrX	1718048	1718049	CG42666-RC	.	.	.
chr3R	18353595	18353596	FlyExpress_CG33099	.	.	.
chr2R	20743008	20743009	.	.	.	.
chr2L	6323901	6323902	CG9491-RC	.	.	.
chr3R	3282792	3282793	.	.	.	.
chr2R	17363360	17363361	.	.	.	.
chr3R	13430902	13430903	.	.	.	.
chr3R	8837918	8837919	.	.	.	.
chr3L	5853503	5853504	.	.	.	.
chr2L	8832489	8832490	CG18024-RA	.	.	.
chr2L	15323573	15323574	.	.	.	.
chr3R	12674546	12674547	CG10325-RA	.	.	.
chr2L	16817404	16817405	.	.	.	.
chr3L	14146196	14146197	.	.	.	.
chr2L	8276627	8276628	.	.	.	.
chr3L	21472802	21472803	.	.	.	.
chr2L	9449326	9449327	CG3779-RA	FlyExpress_Scat	.	.
chr3R	3939887	3939888	.	.	.	.
chr3R	683895	683896	.	.	.	.
chr3L	2429131	2429132	.	.	.	.
chr3R	12056206	12056207	.	.	.	.
chr3L	14170756	14170757	.	.	.	.
chr3R	17432624	17432625	.	.	.	.
chr2R	9335554	9335555	.	.	.	.
chr2L	19135351	19135352	.	.	.	.
chrX	6883107	6883108	.	.	.	.
chr2R	14560881	14560882	.	.	.	.
chr2L	4821278	4821279	.	.	.	.
chr3R	9638595	9638596	.	.	.	.
chr2R	7072242	7072243	.	.	.	.
chr3R	11897775	11897776	.	.	.	.
chr2R	5180166	5180167	.	.	.	.
chr2L	18875263	18875264	CG10619-RB	.	.	.
chr3R	11855352	11855353	.	.	.	.
chrX	3735875	3735876	.	.	.	.
chr3R	9510687	9510688	CG9611-RE	.	.	.
chr3L	22169811	22169812	.	.	.	.
chr3R	12057569	12057570	.	.	.	.
chr2R	18578151	18578152	.	.	.	.
chrX	417476	417477	.	.	.	.
chr2L	8415799	8415800	.	.	.	.
chrX	9360626	9360627	.	.	.	.
chrX	2018210	2018211	CG18412-RA	.	.	.
chr3R	2826727	2826728	.	.	.	.
chr2R	7905297	7905298	.	.	.	.
chr3R	12884871	12884872	.	.	.	.
chrX	9638283	9638284	.	.	.	.
chr2L	4893741	4893742	.	.	.	.
chr3L	14540178	14540179	FlyExpress_CG9238	.	.	.
chr3R	7198573	7198574	CG17228-RF	.	.	.
chrX	7853141	7853142	.	.	.	.
chr3R	12783634	12783635	.	.	.	.
chr2R	5965706	5965707	CG12919-RA	CG2269-RC	.	.
chrX	22257134	22257135	.	.	.	.
chr3R	7179365	7179366	CG17228-RF	.	.	.
chr3R	8471139	8471140	CG6234-RA	CG6753-RA	.	.
chrX	13564833	13564834	CG11164-RA	.	.	.
chr3L	8826150	8826151	.	.	.	.
chr3R	11820189	11820190	.	.	.	.
chr2R	3306271	3306272	.	.	.	.
chr2R	7087312	7087313	.	.	.	.
chr3L	10850955	10850956	.	.	.	.
chr3R	21021124	21021125	CG13653-RA	CG13654-RA	CG11849-RA	.
chr3L	9449143	9449144	.	.	.	.
chr2L	7038695	7038696	.	.	.	.
chr2L	13227215	13227216	FlyExpress_CG15480	.	.	.
chr2L	2448472	2448473	.	.	.	.
chr2R	4872646	4872647	.	.	.	.
chr2R	17138292	17138293	.	.	.	.
chr2R	12038295	12038296	CG8434-RA	.	.	.
chr2L	1420247	1420248	CG5481-RA	.	.	.
chr3L	22393441	22393442	.	.	.	.
chr2L	8416161	8416162	.	.	.	.
chr2L	13905227	13905228	CG8827-RA	CG16869-RA	.	.
chrX	7211289	7211290	CG9653-RA	.	.	.
chr2L	9988507	9988508	.	.	.	.
chr3R	14380550	14380551	.	.	.	.
chr2L	9167150	9167151	.	.	.	.
chr2L	20783315	20783316	CG9326-RC	FlyExpress_cad	.	.
chrX	10716877	10716878	CG1691-RF	.	.	.
chr2R	10921923	10921924	.	.	.	.
chr2L	7420061	7420062	.	.	.	.
chrX	14642747	14642748	CG10521-RA	.	.	.
chr3R	4007324	4007325	.	.	.	.
chr3L	12640693	12640694	.	.	.	.
chr2R	2020358	2020359	.	.	.	.
chr3R	6469293	6469294	CG17117-RE	.	.	.
chr2R	9457102	9457103	CG13333-RA	CG33156-RB	.	.
chr3L	11546228	11546229	.	.	.	.
chr3L	682632	682633	.	.	.	.
chr3L	10856136	10856137	.	.	.	.
chr3L	15033653	15033654	.	.	.	.
chrX	8331575	8331576	.	.	.	.
chr2R	17138739	17138740	.	.	.	.
chr2L	11807159	11807160	CG14938-RD	.	.	.
chr3R	11810712	11810713	.	.	.	.
chr2R	8867911	8867912	.	.	.	.
chrX	19742907	19742908	.	.	.	.
chr2R	17251583	17251584	CG15671-RA	.	.	.
chr2R	6446420	6446421	.	.	.	.
chr3L	19172580	19172581	.	.	.	.
chr3L	16005724	16005725	.	.	.	.
chr3R	3944086	3944087	.	.	.	.
chr3L	6814430	6814431	.	.	.	.
chr2L	19323862	19323863	.	.	.	.
chr3R	20098396	20098397	CG13610-RA	.	.	.
chrX	15705985	15705986	CG32581-RB	CG8974-RA	.	.
chr2L	19791243	19791244	.	.	.	.
chr2R	9471674	9471675	.	.	.	.
chr3R	13275185	13275186	.	.	.	.
chr2L	18839494	18839495	.	.	.	.
chr2L	17752422	17752423	.	.	.	.
chr2L	15732174	15732175	CG3938-RB	.	.	.
chr3L	13371495	13371496	CG10717-RA	.	.	.
chrX	7854645	7854646	.	.	.	.
chr2R	16533924	16533925	.	.	.	.
chr2R	11563951	11563952	.	.	.	.
chr3L	12685910	12685911	.	.	.	.
chr2R	11563323	11563324	.	.	.	.
chr3R	10645567	10645568	CG33555-RG	.	.	.
chr2L	89353	89354	FlyExpress_net	.	.	.
chrX	1134058	1134059	.	.	.	.
chr3R	25115132	25115133	.	.	.	.
chr3R	11924492	11924493	CG31045-RF	.	.	.
chr3R	7178692	7178693	CG17228-RF	.	.	.
chr3L	9013891	9013892	CG5187-RA	CG5093-RA	.	.
chrX	13262611	13262612	.	.	.	.
chr2R	16801662	16801663	.	.	.	.
chrX	21342630	21342631	.	.	.	.
chr2L	5461323	5461324	CG6634-RA	.	.	.
chr2L	18150109	18150110	FlyExpress_Kel	.	.	.
chr2R	11266274	11266275	.	.	.	.
chr2L	3822774	3822775	.	.	.	.
chr2R	15921164	15921165	.	.	.	.
chr2L	14512775	14512776	.	.	.	.
chr2R	2873286	2873287	.	.	.	.
chr2R	9472194	9472195	.	.	.	.
chrX	12636090	12636091	.	.	.	.
chrX	4484161	4484162	.	.	.	.
chr3L	15658730	15658731	.	.	.	.
chr2R	7070145	7070146	.	.	.	.
chr3R	5705463	5705464	.	.	.	.
chr3L	22938139	22938140	.	.	.	.
chr2L	13049006	13049007	.	.	.	.
chr2L	19156369	19156370	CG10719-RC	.	.	.
chr2R	17250562	17250563	CG15671-RA	.	.	.
chr2R	15423248	15423249	.	.	.	.
chr2R	10898409	10898410	.	.	.	.
chr3L	21873757	21873758	.	.	.	.
chr2L	5458760	5458761	CG6634-RA	.	.	.
chrX	580814	580815	.	.	.	.
chr3R	12878700	12878701	.	.	.	.
chr2L	5306627	5306628	.	.	.	.
chr3L	9012699	9012700	CG5187-RA	CG5093-RA	.	.
chr2L	5799393	5799394	.	.	.	.
chrX	8936774	8936775	.	.	.	.
chr2L	15320489	15320490	.	.	.	.
chr3L	11003521	11003522	CG12296-RA	.	.	.
chrX	19645163	19645164	.	.	.	.
chr2R	6471921	6471922	.	.	.	.
chrX	7841120	7841121	.	.	.	.
chr3L	11230167	11230168	CG7590-RA	.	.	.
chr3L	18396303	18396304	.	.	.	.
chr2L	10003795	10003796	.	.	.	.
chr2L	13548206	13548207	.	.	.	.
chr2L	20770527	20770528	FlyExpress_cad	.	.	.
chr3R	2826525	2826526	.	.	.	.
chr3R	7198188	7198189	CG17228-RF	.	.	.
chr3R	11413227	11413228	.	.	.	.
chr3R	12637612	12637613	CG10325-RA	.	.	.
chr3R	25590063	25590064	CG33956-RD	.	.	.
chr2R	6471318	6471319	.	.	.	.
chr2R	17211063	17211064	.	.	.	.
chr2R	20688449	20688450	.	.	.	.
chrX	511694	511695	.	.	.	.
chrX	1293789	1293790	.	.	.	.
chrX	1935722	1935723	.	.	.	.
chrX	3636532	3636533	.	.	.	.
chrX	6879808	6879809	.	.	.	.
chrX	8936430	8936431	.	.	.	.
chrX	8942133	8942134	.	.	.	.
chrX	11923080	11923081	.	.	.	.
chrX	12646063	12646064	.	.	.	.
chrX	14643192	14643193	CG10521-RA	.	.	.
chrX	17724837	17724838	.	.	.	.
chr3L	224839	224840	.	.	.	.
chr3L	258276	258277	.	.	.	.
chr3L	378266	378267	CG6883-RA	.	.	.
chr3L	668732	668733	.	.	.	.
chr3L	779709	779710	.	.	.	.
chr3L	872570	872571	.	.	.	.
chr3L	1334816	1334817	CG9184-RA	.	.	.
chr3L	1352218	1352219	.	.	.	.
chr3L	1731131	1731132	CG7995-RD	.	.	.
chr3L	2437114	2437115	.	.	.	.
chr3L	3197621	3197622	.	.	.	.
chr3L	3411435	3411436	.	.	.	.
chr3L	3593871	3593872	.	.	.	.
chr3L	4252359	4252360	CG15010-RA	.	.	.
chr3L	4253025	4253026	CG15010-RA	.	.	.
chr3L	5597381	5597382	CG10591-RA	.	.	.
chr3L	5729345	5729346	.	.	.	.
chr3L	5976279	5976280	FlyExpress_CG10479	.	.	.
chr3L	6178025	6178026	.	.	.	.
chr3L	6182216	6182217	.	.	.	.
chr3L	6274529	6274530	.	.	.	.
chr3L	6282219	6282220	.	.	.	.
chr3L	6384251	6384252	.	.	.	.
chr3L	6389626	6389627	.	.	.	.
chr3L	6757987	6757988	.	.	.	.
chr3L	7721512	7721513	CG34416-RN	.	.	.
chr3L	8068112	8068113	CG34373-RG	.	.	.
chr3L	8100462	8100463	.	.	.	.
chr3L	8109198	8109199	.	.	.	.
chr3L	8569167	8569168	.	.	.	.
chr3L	8819138	8819139	.	.	.	.
chr3L	8820343	8820344	.	.	.	.
chr3L	8826657	8826658	.	.	.	.
chr3L	9146200	9146201	.	.	.	.
chr3L	9428666	9428667	.	.	.	.
chr3L	9454339	9454340	.	.	.	.
chr3L	10311902	10311903	.	.	.	.
chr3L	10388651	10388652	.	.	.	.
chr3L	10804184	10804185	.	.	.	.
chr3L	10850425	10850426	.	.	.	.
chr3L	11112986	11112987	.	.	.	.
chr3L	11125332	11125333	.	.	.	.
chr3L	11128309	11128310	.	.	.	.
chr3L	11203690	11203691	.	.	.	.
chr3L	11672476	11672477	.	.	.	.
chr3L	12293170	12293171	.	.	.	.
chr3L	12329610	12329611	.	.	.	.
chr3L	12463668	12463669	.	.	.	.
chr3L	12507947	12507948	.	.	.	.
chr3L	12602884	12602885	.	.	.	.
chr3L	12690916	12690917	.	.	.	.
chr3L	12698587	12698588	.	.	.	.
chr3L	13025341	13025342	.	.	.	.
chr3L	13113592	13113593	.	.	.	.
chr3L	13221119	13221120	.	.	.	.
chr3L	13957847	13957848	.	.	.	.
chr3L	14044193	14044194	.	.	.	.
chr3L	14625246	14625247	CG9628-RB	.	.	.
chr3L	14625532	14625533	CG9628-RB	.	.	.
chr3L	15087895	15087896	.	.	.	.
chr3L	15168445	15168446	.	.	.	.
chr3L	15255520	15255521	.	.	.	.
chr3L	15323700	15323701	CG7250-RA	.	.	.
chr3L	15696708	15696709	.	.	.	.
chr3L	15976116	15976117	.	.	.	.
chr3L	16359654	16359655	.	.	.	.
chr3L	16577311	16577312	.	.	.	.
chr3L	16581569	16581570	.	.	.	.
chr3L	17469069	17469070	.	.	.	.
chr3L	17507223	17507224	.	.	.	.
chr3L	17527553	17527554	.	.	.	.
chr3L	19889586	19889587	.	.	.	.
chr3L	19890426	19890427	.	.	.	.
chr3L	19908083	19908084	.	.	.	.
chr3L	20369134	20369135	.	.	.	.
chr3L	20671721	20671722	.	.	.	.
chr3L	21018544	21018545	.	.	.	.
chr3L	21060642	21060643	CG32434-RC	.	.	.
chr3L	21426454	21426455	.	.	.	.
chr3L	21633945	21633946	.	.	.	.
chr3L	21721902	21721903	.	.	.	.
chr3L	22187451	22187452	.	.	.	.
chr3L	22396569	22396570	.	.	.	.
chr3L	22856967	22856968	CG8385-RH	.	.	.
chr2L	91988	91989	FlyExpress_net	CG2674-RG	.	.
chr2L	161192	161193	.	.	.	.
chr2L	161903	161904	.	.	.	.
chr2L	1076541	1076542	.	.	.	.
chr2L	1119150	1119151	.	.	.	.
chr2L	1366273	1366274	.	.	.	.
chr2L	1518058	1518059	.	.	.	.
chr2L	2164877	2164878	CG3166-RB	.	.	.
chr2L	2577170	2577171	.	.	.	.
chr2L	2885149	2885150	.	.	.	.
chr2L	3080598	3080599	.	.	.	.
chr2L	3566593	3566594	.	.	.	.
chr2L	3771884	3771885	.	.	.	.
chr2L	3862633	3862634	.	.	.	.
chr2L	4597833	4597834	CG33196-RC	.	.	.
chr2L	4811831	4811832	.	.	.	.
chr2L	5325211	5325212	.	.	.	.
chr2L	5877798	5877799	.	.	.	.
chr2L	6133520	6133521	.	.	.	.
chr2L	6134089	6134090	.	.	.	.
chr2L	6498531	6498532	.	.	.	.
chr2L	6967710	6967711	CG3423-RA	.	.	.
chr2L	6968000	6968001	CG3423-RA	.	.	.
chr2L	7306941	7306942	.	.	.	.
chr2L	7498389	7498390	.	.	.	.
chr2L	7799888	7799889	.	.	.	.
chr2L	8302970	8302971	.	.	.	.
chr2L	8511829	8511830	.	.	.	.
chr2L	8521989	8521990	.	.	.	.
chr2L	8675792	8675793	.	.	.	.
chr2L	8997547	8997548	.	.	.	.
chr2L	9758014	9758015	.	.	.	.
chr2L	10396347	10396348	.	.	.	.
chr2L	10396755	10396756	.	.	.	.
chr2L	10647830	10647831	.	.	.	.
chr2L	10732525	10732526	.	.	.	.
chr2L	10858131	10858132	.	.	.	.
chr2L	11269037	11269038	.	.	.	.
chr2L	12004013	12004014	.	.	.	.
chr2L	12436393	12436394	CG5442-RA	.	.	.
chr2L	13177020	13177021	CG9828-RB	.	.	.
chr2L	13245184	13245185	FlyExpress_CG15480	.	.	.
chr2L	13264032	13264033	.	.	.	.
chr2L	14261982	14261983	CG15288-RB	.	.	.
chr2L	14445881	14445882	.	.	.	.
chr2L	15038932	15038933	FlyExpress_Su(H)	.	.	.
chr2L	15039353	15039354	FlyExpress_Su(H)	.	.	.
chr2L	15324712	15324713	.	.	.	.
chr2L	15467909	15467910	.	.	.	.
chr2L	15485771	15485772	.	.	.	.
chr2L	16352728	16352729	.	.	.	.
chr2L	16491595	16491596	.	.	.	.
chr2L	16677148	16677149	.	.	.	.
chr2L	16679985	16679986	.	.	.	.
chr2L	16787755	16787756	CG17927-RD	.	.	.
chr2L	17830964	17830965	.	.	.	.
chr2L	18088121	18088122	.	.	.	.
chr2L	18358209	18358210	.	.	.	.
chr2L	18768320	18768321	.	.	.	.
chr2L	18808859	18808860	.	.	.	.
chr2L	19158746	19158747	CG10719-RC	.	.	.
chr2L	19219908	19219909	.	.	.	.
chr2L	19453563	19453564	.	.	.	.
chr2L	19475274	19475275	.	.	.	.
chr2L	19758719	19758720	.	.	.	.
chr2L	20350258	20350259	.	.	.	.
chr2L	20647512	20647513	.	.	.	.
chr2L	20676058	20676059	.	.	.	.
chr3R	604711	604712	.	.	.	.
chr3R	801358	801359	.	.	.	.
chr3R	869049	869050	.	.	.	.
chr3R	2176531	2176532	.	.	.	.
chr3R	2194114	2194115	.	.	.	.
chr3R	2206011	2206012	.	.	.	.
chr3R	2490335	2490336	.	.	.	.
chr3R	2738831	2738832	.	.	.	.
chr3R	2775097	2775098	.	.	.	.
chr3R	2863501	2863502	.	.	.	.
chr3R	2912513	2912514	.	.	.	.
chr3R	2919579	2919580	.	.	.	.
chr3R	3636040	3636041	.	.	.	.
chr3R	3733160	3733161	.	.	.	.
chr3R	4016830	4016831	.	.	.	.
chr3R	4059229	4059230	.	.	.	.
chr3R	4097825	4097826	.	.	.	.
chr3R	4303226	4303227	CG45263-RA	.	.	.
chr3R	4476588	4476589	.	.	.	.
chr3R	4573436	4573437	.	.	.	.
chr3R	4865231	4865232	CG11988-RA	.	.	.
chr3R	5031956	5031957	.	.	.	.
chr3R	5044135	5044136	.	.	.	.
chr3R	5412598	5412599	.	.	.	.
chr3R	5452838	5452839	.	.	.	.
chr3R	5463373	5463374	.	.	.	.
chr3R	5626847	5626848	.	.	.	.
chr3R	5715239	5715240	.	.	.	.
chr3R	6321797	6321798	.	.	.	.
chr3R	6347287	6347288	.	.	.	.
chr3R	6586851	6586852	.	.	.	.
chr3R	6610087	6610088	.	.	.	.
chr3R	7788677	7788678	.	.	.	.
chr3R	7954458	7954459	CG4702-RA	.	.	.
chr3R	8293681	8293682	CG31449-RA	.	.	.
chr3R	8930173	8930174	.	.	.	.
chr3R	9119414	9119415	.	.	.	.
chr3R	9263166	9263167	CG18290-RA	.	.	.
chr3R	9389127	9389128	.	.	.	.
chr3R	9735694	9735695	.	.	.	.
chr3R	10217180	10217181	.	.	.	.
chr3R	10247737	10247738	.	.	.	.
chr3R	10407362	10407363	CG31317-RA	.	.	.
chr3R	10450129	10450130	.	.	.	.
chr3R	10451787	10451788	.	.	.	.
chr3R	10481362	10481363	.	.	.	.
chr3R	10505427	10505428	CG7649-RB	.	.	.
chr3R	10643813	10643814	CG33555-RG	.	.	.
chr3R	11022233	11022234	.	.	.	.
chr3R	11034813	11034814	.	.	.	.
chr3R	11106611	11106612	CG4898-RB	.	.	.
chr3R	11299393	11299394	.	.	.	.
chr3R	11875374	11875375	.	.	.	.
chr3R	12267495	12267496	.	.	.	.
chr3R	12473275	12473276	.	.	.	.
chr3R	12575983	12575984	.	.	.	.
chr3R	12724494	12724495	.	.	.	.
chr3R	12759620	12759621	.	.	.	.
chr3R	12795538	12795539	.	.	.	.
chr3R	12854171	12854172	.	.	.	.
chr3R	12878576	12878577	.	.	.	.
chr3R	12880229	12880230	.	.	.	.
chr3R	12905263	12905264	CG3937-RB	.	.	.
chr3R	12977561	12977562	.	.	.	.
chr3R	13366028	13366029	.	.	.	.
chr3R	13429563	13429564	.	.	.	.
chr3R	13631033	13631034	.	.	.	.
chr3R	14982525	14982526	.	.	.	.
chr3R	14989790	14989791	.	.	.	.
chr3R	15625123	15625124	.	.	.	.
chr3R	15625727	15625728	.	.	.	.
chr3R	15690295	15690296	.	.	.	.
chr3R	16117666	16117667	.	.	.	.
chr3R	16774405	16774406	.	.	.	.
chr3R	16927858	16927859	.	.	.	.
chr3R	17199263	17199264	CG32491-RG	.	.	.
chr3R	17218822	17218823	CG32491-RG	.	.	.
chr3R	17220019	17220020	CG32491-RG	.	.	.
chr3R	17959714	17959715	.	.	.	.
chr3R	17960257	17960258	.	.	.	.
chr3R	18044716	18044717	.	.	.	.
chr3R	18516128	18516129	.	.	.	.
chr3R	18576508	18576509	.	.	.	.
chr3R	18615098	18615099	.	.	.	.
chr3R	18967708	18967709	.	.	.	.
chr3R	19203192	19203193	CG4408-RA	.	.	.
chr3R	19699748	19699749	.	.	.	.
chr3R	19757143	19757144	.	.	.	.
chr3R	19995387	19995388	.	.	.	.
chr3R	20159091	20159092	.	.	.	.
chr3R	20412362	20412363	.	.	.	.
chr3R	20639612	20639613	.	.	.	.
chr3R	20696320	20696321	.	.	.	.
chr3R	20804204	20804205	.	.	.	.
chr3R	21020626	21020627	CG13653-RA	CG13654-RA	CG11849-RA	.
chr3R	21841124	21841125	FlyExpress_e(spl)m5-HLH	.	.	.
chr3R	21868052	21868053	CG8384-RA	FlyExpress_e(spl)m5-HLH	.	.
chr3R	21868630	21868631	CG8384-RA	FlyExpress_e(spl)m5-HLH	.	.
chr3R	21948327	21948328	.	.	.	.
chr3R	22708397	22708398	.	.	.	.
chr3R	23064849	23064850	CG31064-RA	.	.	.
chr3R	23106971	23106972	.	.	.	.
chr3R	23669730	23669731	.	.	.	.
chr3R	23811929	23811930	.	.	.	.
chr3R	23941902	23941903	.	.	.	.
chr3R	24457704	24457705	.	.	.	.
chr3R	24817791	24817792	.	.	.	.
chr3R	24938734	24938735	.	.	.	.
chr3R	25177429	25177430	.	.	.	.
chr3R	25283116	25283117	.	.	.	.
chr3R	25871314	25871315	.	.	.	.
chr3R	26581063	26581064	.	.	.	.
chr3R	26607524	26607525	.	.	.	.
chr3R	26738374	26738375	.	.	.	.
chr3R	27073824	27073825	.	.	.	.
chr3R	27526592	27526593	.	.	.	.
chr2R	1664031	1664032	.	.	.	.
chr2R	2460906	2460907	.	.	.	.
chr2R	2519892	2519893	.	.	.	.
chr2R	3027419	3027420	CG12172-RA	.	.	.
chr2R	4174753	4174754	.	.	.	.
chr2R	4794834	4794835	.	.	.	.
chr2R	5466468	5466469	.	.	.	.
chr2R	6356063	6356064	.	.	.	.
chr2R	6422852	6422853	CG12052-RA	.	.	.
chr2R	6731669	6731670	CG30015-RD	.	.	.
chr2R	7872908	7872909	.	.	.	.
chr2R	8027994	8027995	.	.	.	.
chr2R	8521088	8521089	CG8632-RA	.	.	.
chr2R	8664416	8664417	CG17579-RB	.	.	.
chr2R	8844027	8844028	.	.	.	.
chr2R	8873303	8873304	.	.	.	.
chr2R	8879182	8879183	.	.	.	.
chr2R	9046051	9046052	CG4007-RA	.	.	.
chr2R	9055443	9055444	CG4007-RA	.	.	.
chr2R	9076973	9076974	.	.	.	.
chr2R	9359644	9359645	.	.	.	.
chr2R	9448207	9448208	CG13333-RA	CG33156-RB	.	.
chr2R	9449139	9449140	CG13333-RA	CG33156-RB	.	.
chr2R	9450928	9450929	CG13333-RA	CG33156-RB	.	.
chr2R	9451313	9451314	CG13333-RA	CG33156-RB	.	.
chr2R	9452219	9452220	CG13333-RA	CG33156-RB	.	.
chr2R	9453851	9453852	CG13333-RA	CG33156-RB	.	.
chr2R	9454414	9454415	CG13333-RA	CG33156-RB	.	.
chr2R	9455002	9455003	CG13333-RA	CG33156-RB	.	.
chr2R	9456467	9456468	CG13333-RA	CG33156-RB	.	.
chr2R	9457795	9457796	CG13333-RA	.	.	.
chr2R	9741907	9741908	.	.	.	.
chr2R	10061749	10061750	.	.	.	.
chr2R	10062329	10062330	.	.	.	.
chr2R	10064420	10064421	.	.	.	.
chr2R	10158140	10158141	CG8547-RB	.	.	.
chr2R	10299285	10299286	.	.	.	.
chr2R	10391472	10391473	CG10112-RA	.	.	.
chr2R	10506289	10506290	.	.	.	.
chr2R	10639728	10639729	.	.	.	.
chr2R	10950240	10950241	.	.	.	.
chr2R	11209738	11209739	.	.	.	.
chr2R	11778476	11778477	.	.	.	.
chr2R	11785740	11785741	.	.	.	.
chr2R	11788189	11788190	.	.	.	.
chr2R	13030736	13030737	.	.	.	.
chr2R	13553220	13553221	.	.	.	.
chr2R	13683510	13683511	.	.	.	.
chr2R	13739162	13739163	.	.	.	.
chr2R	14047955	14047956	.	.	.	.
chr2R	14082204	14082205	.	.	.	.
chr2R	14098482	14098483	.	.	.	.
chr2R	14164866	14164867	.	.	.	.
chr2R	14453268	14453269	.	.	.	.
chr2R	14690275	14690276	FlyExpress_l(2)08717	FlyExpress_CG15094	.	.
chr2R	14734252	14734253	CG15098-RA	.	.	.
chr2R	14844604	14844605	.	.	.	.
chr2R	14947727	14947728	.	.	.	.
chr2R	15150183	15150184	CG7225-RA	.	.	.
chr2R	15518675	15518676	.	.	.	.
chr2R	15728374	15728375	CG8595-RA	.	.	.
chr2R	15994011	15994012	.	.	.	.
chr2R	16087639	16087640	.	.	.	.
chr2R	16490535	16490536	CG13425-RB	.	.	.
chr2R	16554970	16554971	.	.	.	.
chr2R	16555533	16555534	.	.	.	.
chr2R	16794951	16794952	.	.	.	.
chr2R	17368434	17368435	.	.	.	.
chr2R	17432976	17432977	CG10079-RB	.	.	.
chr2R	17433575	17433576	CG10079-RB	.	.	.
chr2R	17534148	17534149	CG10082-RB	.	.	.
chr2R	17578722	17578723	.	.	.	.
chr2R	18136246	18136247	.	.	.	.
chr2R	18576624	18576625	.	.	.	.
chr2R	18577388	18577389	.	.	.	.
chr2R	18690536	18690537	.	.	.	.
chr2R	18937305	18937306	.	.	.	.
chr2R	19105678	19105679	.	.	.	.
chr2R	19435556	19435557	.	.	.	.
chr2R	19866414	19866415	.	.	.	.
chr2R	19916423	19916424	.	.	.	.
chr2R	20585482	20585483	.	.	.	.
chr2R	20893720	20893721	.	.	.	.
chrX	413505	413506	.	.	.	.
chrX	484897	484898	.	.	.	.
chrX	510700	510701	.	.	.	.
chrX	981094	981095	.	.	.	.
chrX	1104078	1104079	.	.	.	.
chrX	1378278	1378279	.	.	.	.
chrX	1378784	1378785	.	.	.	.
chrX	1538304	1538305	.	.	.	.
chrX	1548972	1548973	.	.	.	.
chrX	1550627	1550628	.	.	.	.
chrX	1551815	1551816	.	.	.	.
chrX	1802230	1802231	.	.	.	.
chrX	2019750	2019751	CG18412-RA	.	.	.
chrX	2059839	2059840	.	.	.	.
chrX	2074954	2074955	.	.	.	.
chrX	2302818	2302819	.	.	.	.
chrX	2338006	2338007	.	.	.	.
chrX	3082003	3082004	.	.	.	.
chrX	3376808	3376809	.	.	.	.
chrX	3613940	3613941	.	.	.	.
chrX	3635007	3635008	.	.	.	.
chrX	3667163	3667164	CG2947-RB	.	.	.
chrX	4091362	4091363	.	.	.	.
chrX	4105354	4105355	.	.	.	.
chrX	4131823	4131824	.	.	.	.
chrX	4285092	4285093	.	.	.	.
chrX	4834546	4834547	CG44774-RA	.	.	.
chrX	5069200	5069201	.	.	.	.
chrX	5223552	5223553	CG4193-RA	.	.	.
chrX	5448283	5448284	.	.	.	.
chrX	5687687	5687688	CG3108-RA	.	.	.
chrX	5691871	5691872	CG3108-RA	.	.	.
chrX	5695132	5695133	CG3108-RA	.	.	.
chrX	5792861	5792862	.	.	.	.
chrX	5794691	5794692	.	.	.	.
chrX	5890843	5890844	.	.	.	.
chrX	6634179	6634180	.	.	.	.
chrX	6697722	6697723	.	.	.	.
chrX	6698240	6698241	.	.	.	.
chrX	6749997	6749998	.	.	.	.
chrX	7070076	7070077	.	.	.	.
chrX	7497958	7497959	CG11387-RA	.	.	.
chrX	7502099	7502100	CG11387-RA	.	.	.
chrX	7877427	7877428	.	.	.	.
chrX	7955508	7955509	CG2252-RC	.	.	.
chrX	8036288	8036289	.	.	.	.
chrX	8262732	8262733	.	.	.	.
chrX	8318666	8318667	.	.	.	.
chrX	8526607	8526608	.	.	.	.
chrX	8614434	8614435	.	.	.	.
chrX	8724058	8724059	.	.	.	.
chrX	8838071	8838072	.	.	.	.
chrX	9374014	9374015	.	.	.	.
chrX	9444788	9444789	.	.	.	.
chrX	9578725	9578726	CG12653-RA	.	.	.
chrX	9579800	9579801	CG12653-RA	.	.	.
chrX	9638116	9638117	.	.	.	.
chrX	9685398	9685399	.	.	.	.
chrX	10367140	10367141	.	.	.	.
chrX	10639090	10639091	.	.	.	.
chrX	10696242	10696243	.	.	.	.
chrX	11458081	11458082	.	.	.	.
chrX	11610745	11610746	.	.	.	.
chrX	11728859	11728860	.	.	.	.
chrX	12309727	12309728	.	.	.	.
chrX	12526345	12526346	.	.	.	.
chrX	12528112	12528113	.	.	.	.
chrX	12832367	12832368	CG4396-RA	.	.	.
chrX	13190962	13190963	.	.	.	.
chrX	13703043	13703044	.	.	.	.
chrX	13713564	13713565	.	.	.	.
chrX	14374203	14374204	.	.	.	.
chrX	14432703	14432704	.	.	.	.
chrX	14859988	14859989	.	.	.	.
chrX	15213463	15213464	.	.	.	.
chrX	15468634	15468635	.	.	.	.
chrX	15606607	15606608	.	.	.	.
chrX	15628177	15628178	.	.	.	.
chrX	15988240	15988241	.	.	.	.
chrX	16056046	16056047	.	.	.	.
chrX	16135998	16135999	.	.	.	.
chrX	16214680	16214681	.	.	.	.
chrX	16393563	16393564	.	.	.	.
chrX	16492925	16492926	.	.	.	.
chrX	16669520	16669521	CG9623-RB	.	.	.
chrX	17227038	17227039	.	.	.	.
chrX	17380042	17380043	.	.	.	.
chrX	17645353	17645354	.	.	.	.
chrX	17877197	17877198	.	.	.	.
chrX	18165126	18165127	.	.	.	.
chrX	18193364	18193365	.	.	.	.
chrX	18264886	18264887	.	.	.	.
chrX	18535718	18535719	.	.	.	.
chrX	19659429	19659430	.	.	.	.
chrX	20122348	20122349	.	.	.	.
chrX	20265390	20265391	.	.	.	.
chrX	21075266	21075267	.	.	.	.
chrX	21239637	21239638	.	.	.	.
chrX	21317798	21317799	.	.	.	.
chrX	21857508	21857509	.	.	.	.
chrX	21863178	21863179	.	.	.	.

## Sheet: 20kb_Peak_to_Gene
#feature.id	chr_1	start_1	end_1	dist_closest_1	chr_2	start_2	end_2	dist_closest_2	chr_3	start_3	end_3	dist_closest_3	chr_4	start_4	end_4	dist_closest_4
CG8827-RA	chr2L	13905227	13905228	417	.	.	.	.	.	.	.	.	.	.	.	.
CG33466-RA	.	.	.	.	.	.	.	.	.	.	.	.	.	.	.	.
CG16869-RA	chr2L	13905227	13905228	4412	.	.	.	.	.	.	.	.	.	.	.	.
CG3218-RA	.	.	.	.	.	.	.	.	.	.	.	.	.	.	.	.
CG8649-RD	.	.	.	.	.	.	.	.	.	.	.	.	.	.	.	.
CG1944-RA	.	.	.	.	.	.	.	.	.	.	.	.	.	.	.	.
CG1048-RA	chr3R	2580238	2580239	10375	chr3R	2588944	2588945	19081	.	.	.	.	.	.	.	.
CG13653-RA	chr3R	21021124	21021125	157	chr3R	21020626	21020627	655	.	.	.	.	.	.	.	.
CG5055-RB	chrX	17071987	17071988	8986	.	.	.	.	.	.	.	.	.	.	.	.
CG12283-RA	.	.	.	.	.	.	.	.	.	.	.	.	.	.	.	.
CG7997-RB	.	.	.	.	.	.	.	.	.	.	.	.	.	.	.	.
CG8095-RB	.	.	.	.	.	.	.	.	.	.	.	.	.	.	.	.
CG2762-RA	chr2L	523080	523081	386	chr2L	518626	518627	4840	.	.	.	.	.	.	.	.
CG18088-RA	.	.	.	.	.	.	.	.	.	.	.	.	.	.	.	.
CG5187-RA	chr3L	9012699	9012700	358	chr3L	9013891	9013892	1550	chr3L	9010275	9010276	0	chr3L	8998185	8998186	7599
CG9520-RA	.	.	.	.	.	.	.	.	.	.	.	.	.	.	.	.
CG12011-RA	.	.	.	.	.	.	.	.	.	.	.	.	.	.	.	.
CG13800-RA	chr3L	2385879	2385880	2512	.	.	.	.	.	.	.	.	.	.	.	.
CG10619-RB	chr2L	18875263	18875264	0	chr2L	18890339	18890340	9089	chr2L	18895473	18895474	14223	.	.	.	.
CG31902-RB	.	.	.	.	.	.	.	.	.	.	.	.	.	.	.	.
CG12919-RA	chr2R	5965706	5965707	163	chr2R	5964776	5964777	1093	.	.	.	.	.	.	.	.
CG5399-RA	.	.	.	.	.	.	.	.	.	.	.	.	.	.	.	.
CG8084-RA	chr2R	4958868	4958869	0	chr2R	4959563	4959564	0	.	.	.	.	.	.	.	.
CG11893-RA	.	.	.	.	.	.	.	.	.	.	.	.	.	.	.	.
CG45263-RA	chr3R	4303226	4303227	0	chr3R	4293619	4293620	0	.	.	.	.	.	.	.	.
CG13912-RA	.	.	.	.	.	.	.	.	.	.	.	.	.	.	.	.
CG33956-RD	chr3R	25590063	25590064	2433	chr3R	25596904	25596905	0	.	.	.	.	.	.	.	.
CG6394-RA	.	.	.	.	.	.	.	.	.	.	.	.	.	.	.	.
CG9446-RB	.	.	.	.	.	.	.	.	.	.	.	.	.	.	.	.
CG1046-RA	chr3R	2580238	2580239	316	chr3R	2588944	2588945	9022	.	.	.	.	.	.	.	.
CG17574-RD	.	.	.	.	.	.	.	.	.	.	.	.	.	.	.	.
CG2947-RB	chrX	3673905	3673906	10164	chrX	3671474	3671475	12595	chrX	3667163	3667164	16906	.	.	.	.
CG15236-RB	.	.	.	.	.	.	.	.	.	.	.	.	.	.	.	.
CG7530-RC	.	.	.	.	.	.	.	.	.	.	.	.	.	.	.	.
CG42666-RC	chrX	1718048	1718049	18612	.	.	.	.	.	.	.	.	.	.	.	.
CG7005-RA	.	.	.	.	.	.	.	.	.	.	.	.	.	.	.	.
CG4193-RA	chrX	5223552	5223553	16396	.	.	.	.	.	.	.	.	.	.	.	.
CG34373-RG	chr3L	8068112	8068113	2379	chr3L	8072913	8072914	0	.	.	.	.	.	.	.	.
CG16778-RC	chr2R	20995332	20995333	9592	.	.	.	.	.	.	.	.	.	.	.	.
CG3940-RA	.	.	.	.	.	.	.	.	.	.	.	.	.	.	.	.
CG15671-RA	chr2R	17255140	17255141	0	chr2R	17252224	17252225	0	chr2R	17251583	17251584	0	chr2R	17250948	17250949	0
CG43332-RA	.	.	.	.	.	.	.	.	.	.	.	.	.	.	.	.
CG6234-RA	chr3R	8472086	8472087	1695	chr3R	8471765	8471766	2016	chr3R	8471139	8471140	2642	.	.	.	.
CG7590-RA	chr3L	11230167	11230168	15241	.	.	.	.	.	.	.	.	.	.	.	.
CG12212-RA	.	.	.	.	.	.	.	.	.	.	.	.	.	.	.	.
CG31449-RA	chr3R	8293681	8293682	180	.	.	.	.	.	.	.	.	.	.	.	.
CG5133-RA	chr3L	9034632	9034633	0	chr3L	9034243	9034244	233	chr3L	9033834	9033835	642	chr3L	9035479	9035480	0
CG5661-RA	.	.	.	.	.	.	.	.	.	.	.	.	.	.	.	.
CG42365-RA	chr2R	17536634	17536635	17617	.	.	.	.	.	.	.	.	.	.	.	.
CG31641-RC	chr2L	6088479	6088480	11898	.	.	.	.	.	.	.	.	.	.	.	.
CG30463-RC	.	.	.	.	.	.	.	.	.	.	.	.	.	.	.	.
CG8974-RA	chrX	15705985	15705986	15905	.	.	.	.	.	.	.	.	.	.	.	.
CG5442-RA	chr2L	12436393	12436394	1733	.	.	.	.	.	.	.	.	.	.	.	.
CG5093-RA	chr3L	8998185	8998186	112	chr3L	8996581	8996582	1716	chr3L	9010275	9010276	9923	chr3L	9012699	9012700	12347
CG17524-RA	.	.	.	.	.	.	.	.	.	.	.	.	.	.	.	.
CG31462-RA	.	.	.	.	.	.	.	.	.	.	.	.	.	.	.	.
CG2674-RG	chr2L	91988	91989	17619	chr2L	91520	91521	18087	.	.	.	.	.	.	.	.
CG44774-RA	chrX	4834546	4834547	10666	.	.	.	.	.	.	.	.	.	.	.	.
CG13654-RA	chr3R	21021124	21021125	4415	chr3R	21020626	21020627	4913	.	.	.	.	.	.	.	.
CG3206-RA	.	.	.	.	.	.	.	.	.	.	.	.	.	.	.	.
CG15162-RA	.	.	.	.	.	.	.	.	.	.	.	.	.	.	.	.
CG33300-RA	.	.	.	.	.	.	.	.	.	.	.	.	.	.	.	.
CG5014-RC	.	.	.	.	.	.	.	.	.	.	.	.	.	.	.	.
CG6753-RA	chr3R	8471139	8471140	2843	chr3R	8471765	8471766	3469	chr3R	8472086	8472087	3790	.	.	.	.
CG1916-RA	chr2R	5378382	5378383	3291	.	.	.	.	.	.	.	.	.	.	.	.
CG4421-RA	.	.	.	.	.	.	.	.	.	.	.	.	.	.	.	.
CG8448-RC	.	.	.	.	.	.	.	.	.	.	.	.	.	.	.	.
CG7995-RD	chr3L	1731131	1731132	8030	.	.	.	.	.	.	.	.	.	.	.	.
CG11164-RA	chrX	13564833	13564834	1513	.	.	.	.	.	.	.	.	.	.	.	.
CG31760-RA	.	.	.	.	.	.	.	.	.	.	.	.	.	.	.	.
CG10082-RB	chr2R	17536634	17536635	4509	chr2R	17534148	17534149	6995	.	.	.	.	.	.	.	.
CG3664-RF	.	.	.	.	.	.	.	.	.	.	.	.	.	.	.	.
CG2269-RC	chr2R	5965706	5965707	9369	chr2R	5964776	5964777	10299	.	.	.	.	.	.	.	.
CG10626-RA	.	.	.	.	.	.	.	.	.	.	.	.	.	.	.	.
CG4408-RA	chr3R	19203192	19203193	13432	chr3R	19172142	19172143	15468	.	.	.	.	.	.	.	.
CG9339-RE	.	.	.	.	.	.	.	.	.	.	.	.	.	.	.	.
CG42329-RA	.	.	.	.	.	.	.	.	.	.	.	.	.	.	.	.
CG9734-RC	.	.	.	.	.	.	.	.	.	.	.	.	.	.	.	.
CG7272-RA	.	.	.	.	.	.	.	.	.	.	.	.	.	.	.	.
CG31064-RA	chr3R	23064849	23064850	49	.	.	.	.	.	.	.	.	.	.	.	.
CG10360-RB	.	.	.	.	.	.	.	.	.	.	.	.	.	.	.	.
CG15817-RA	.	.	.	.	.	.	.	.	.	.	.	.	.	.	.	.
CG3798-RA	.	.	.	.	.	.	.	.	.	.	.	.	.	.	.	.
CG32021-RA	.	.	.	.	.	.	.	.	.	.	.	.	.	.	.	.
CG1389-RA	.	.	.	.	.	.	.	.	.	.	.	.	.	.	.	.
CG8849-RA	.	.	.	.	.	.	.	.	.	.	.	.	.	.	.	.
CG30382-RA	.	.	.	.	.	.	.	.	.	.	.	.	.	.	.	.
CG14545-RA	.	.	.	.	.	.	.	.	.	.	.	.	.	.	.	.
CG33156-RB	chr2R	9448207	9448208	10426	chr2R	9449139	9449140	11358	chr2R	9450928	9450929	13147	chr2R	9451313	9451314	13532
CG5272-RA	.	.	.	.	.	.	.	.	.	.	.	.	.	.	.	.
CG3752-RA	.	.	.	.	.	.	.	.	.	.	.	.	.	.	.	.
CG9674-RD	.	.	.	.	.	.	.	.	.	.	.	.	.	.	.	.
CG13610-RA	chr3R	20098396	20098397	356	.	.	.	.	.	.	.	.	.	.	.	.
CG5099-RB	chr3R	21325796	21325797	18248	.	.	.	.	.	.	.	.	.	.	.	.
CG8632-RA	chr2R	8521088	8521089	19223	.	.	.	.	.	.	.	.	.	.	.	.
CG7937-RA	.	.	.	.	.	.	.	.	.	.	.	.	.	.	.	.
CG8524-RB	.	.	.	.	.	.	.	.	.	.	.	.	.	.	.	.
CG3429-RA	.	.	.	.	.	.	.	.	.	.	.	.	.	.	.	.
CG32581-RB	chrX	15705985	15705986	12795	.	.	.	.	.	.	.	.	.	.	.	.
CG4302-RA	.	.	.	.	.	.	.	.	.	.	.	.	.	.	.	.
CG8385-RH	chr3L	22856967	22856968	4511	.	.	.	.	.	.	.	.	.	.	.	.
CG15658-RA	.	.	.	.	.	.	.	.	.	.	.	.	.	.	.	.
CG10184-RA	.	.	.	.	.	.	.	.	.	.	.	.	.	.	.	.
CG32697-RA	.	.	.	.	.	.	.	.	.	.	.	.	.	.	.	.
CG6721-RA	chr3L	9848010	9848011	0	chr3L	9849000	9849001	620	.	.	.	.	.	.	.	.
CG10072-RA	.	.	.	.	.	.	.	.	.	.	.	.	.	.	.	.
CG4404-RA	.	.	.	.	.	.	.	.	.	.	.	.	.	.	.	.
CG7660-RB	.	.	.	.	.	.	.	.	.	.	.	.	.	.	.	.
CG10236-RA	.	.	.	.	.	.	.	.	.	.	.	.	.	.	.	.
CG5888-RA	.	.	.	.	.	.	.	.	.	.	.	.	.	.	.	.
CG16983-RF	.	.	.	.	.	.	.	.	.	.	.	.	.	.	.	.
CG5481-RA	chr2L	1420247	1420248	0	.	.	.	.	.	.	.	.	.	.	.	.
CG32434-RC	chr3L	21060642	21060643	345	.	.	.	.	.	.	.	.	.	.	.	.
CG2125-RA	.	.	.	.	.	.	.	.	.	.	.	.	.	.	.	.
CG17941-RA	.	.	.	.	.	.	.	.	.	.	.	.	.	.	.	.
CG8495-RC	.	.	.	.	.	.	.	.	.	.	.	.	.	.	.	.
CG34214-RA	.	.	.	.	.	.	.	.	.	.	.	.	.	.	.	.
CG12369-RB	.	.	.	.	.	.	.	.	.	.	.	.	.	.	.	.
CG9075-RB	.	.	.	.	.	.	.	.	.	.	.	.	.	.	.	.
CG3938-RB	chr2L	15732174	15732175	394	.	.	.	.	.	.	.	.	.	.	.	.
CG12028-RA	.	.	.	.	.	.	.	.	.	.	.	.	.	.	.	.
CG11849-RA	chr3R	21020626	21020627	2106	chr3R	21021124	21021125	2604	.	.	.	.	.	.	.	.
CG17348-RA	.	.	.	.	.	.	.	.	.	.	.	.	.	.	.	.
CG18412-RA	chrX	2019750	2019751	486	chrX	2018210	2018211	2026	.	.	.	.	.	.	.	.
CG7649-RB	chr3R	10505427	10505428	0	.	.	.	.	.	.	.	.	.	.	.	.
CG13333-RA	chr2R	9448207	9448208	3359	chr2R	9449139	9449140	4291	chr2R	9450928	9450929	6080	chr2R	9451313	9451314	6465
CG3423-RA	chr2L	6967710	6967711	13119	chr2L	6968000	6968001	13409	.	.	.	.	.	.	.	.
CG14025-RC	.	.	.	.	.	.	.	.	.	.	.	.	.	.	.	.
CG15010-RA	chr3L	4252359	4252360	239	chr3L	4253025	4253026	905	.	.	.	.	.	.	.	.
CG3048-RA	.	.	.	.	.	.	.	.	.	.	.	.	.	.	.	.
CG34137-RA	.	.	.	.	.	.	.	.	.	.	.	.	.	.	.	.
CG3166-RB	chr2L	2164877	2164878	0	.	.	.	.	.	.	.	.	.	.	.	.
CG1691-RF	chrX	10716877	10716878	67	.	.	.	.	.	.	.	.	.	.	.	.
CG15288-RB	chr2L	14261982	14261983	1539	.	.	.	.	.	.	.	.	.	.	.	.
CG33232-RC	.	.	.	.	.	.	.	.	.	.	.	.	.	.	.	.
CG6868-RA	.	.	.	.	.	.	.	.	.	.	.	.	.	.	.	.
CG4922-RA	.	.	.	.	.	.	.	.	.	.	.	.	.	.	.	.
CG3779-RA	chr2L	9449326	9449327	503	.	.	.	.	.	.	.	.	.	.	.	.
CG31531-RB	.	.	.	.	.	.	.	.	.	.	.	.	.	.	.	.
CG7271-RA	.	.	.	.	.	.	.	.	.	.	.	.	.	.	.	.
CG34383-RC	.	.	.	.	.	.	.	.	.	.	.	.	.	.	.	.
CG9775-RC	.	.	.	.	.	.	.	.	.	.	.	.	.	.	.	.
CG3322-RA	.	.	.	.	.	.	.	.	.	.	.	.	.	.	.	.
CG31607-RA	.	.	.	.	.	.	.	.	.	.	.	.	.	.	.	.
CG18255-RD	.	.	.	.	.	.	.	.	.	.	.	.	.	.	.	.
CG10293-RC	.	.	.	.	.	.	.	.	.	.	.	.	.	.	.	.
CG10079-RB	chr2R	17433575	17433576	1498	chr2R	17432976	17432977	2097	.	.	.	.	.	.	.	.
CG12082-RA	.	.	.	.	.	.	.	.	.	.	.	.	.	.	.	.
CG4216-RA	.	.	.	.	.	.	.	.	.	.	.	.	.	.	.	.
CG11851-RA	.	.	.	.	.	.	.	.	.	.	.	.	.	.	.	.
CG18111-RA	.	.	.	.	.	.	.	.	.	.	.	.	.	.	.	.
CG42278-RC	.	.	.	.	.	.	.	.	.	.	.	.	.	.	.	.
CG2252-RC	chrX	7955508	7955509	38	.	.	.	.	.	.	.	.	.	.	.	.
CG31317-RA	chr3R	10407362	10407363	10822	.	.	.	.	.	.	.	.	.	.	.	.
CG11988-RA	chr3R	4856038	4856039	0	chr3R	4865231	4865232	5781	.	.	.	.	.	.	.	.
CG8434-RA	chr2R	12047621	12047622	4230	chr2R	12038295	12038296	13556	.	.	.	.	.	.	.	.
CG7540-RA	.	.	.	.	.	.	.	.	.	.	.	.	.	.	.	.
CG14080-RB	.	.	.	.	.	.	.	.	.	.	.	.	.	.	.	.
CG3424-RA	.	.	.	.	.	.	.	.	.	.	.	.	.	.	.	.
CG33196-RC	chr2L	4597833	4597834	5869	.	.	.	.	.	.	.	.	.	.	.	.
CG14985-RB	.	.	.	.	.	.	.	.	.	.	.	.	.	.	.	.
CG30023-RA	.	.	.	.	.	.	.	.	.	.	.	.	.	.	.	.
CG13651-RA	.	.	.	.	.	.	.	.	.	.	.	.	.	.	.	.
CG3502-RB	.	.	.	.	.	.	.	.	.	.	.	.	.	.	.	.
CG32227-RA	.	.	.	.	.	.	.	.	.	.	.	.	.	.	.	.
CG7250-RA	chr3L	15323700	15323701	6099	.	.	.	.	.	.	.	.	.	.	.	.
CG8654-RA	.	.	.	.	.	.	.	.	.	.	.	.	.	.	.	.
CG30015-RD	chr2R	6731669	6731670	140	.	.	.	.	.	.	.	.	.	.	.	.
CG33868-RA	.	.	.	.	.	.	.	.	.	.	.	.	.	.	.	.
CG13425-RB	chr2R	16490535	16490536	0	.	.	.	.	.	.	.	.	.	.	.	.
CG8384-RA	chr3R	21868052	21868053	0	chr3R	21868630	21868631	0	chr3R	21856502	21856503	11349	.	.	.	.
CG11949-RA	.	.	.	.	.	.	.	.	.	.	.	.	.	.	.	.
CG14938-RD	chr2L	11807159	11807160	0	.	.	.	.	.	.	.	.	.	.	.	.
CG3937-RB	chr3R	12906836	12906837	10420	chr3R	12905263	12905264	11993	.	.	.	.	.	.	.	.
CG32062-RG	.	.	.	.	.	.	.	.	.	.	.	.	.	.	.	.
CG6885-RA	.	.	.	.	.	.	.	.	.	.	.	.	.	.	.	.
CG9623-RB	chrX	16669520	16669521	0	.	.	.	.	.	.	.	.	.	.	.	.
CG4702-RA	chr3R	7954458	7954459	538	.	.	.	.	.	.	.	.	.	.	.	.
CG17579-RB	chr2R	8664416	8664417	3632	.	.	.	.	.	.	.	.	.	.	.	.
CG17894-RB	.	.	.	.	.	.	.	.	.	.	.	.	.	.	.	.
CG2028-RC	chrX	12548561	12548562	211	chrX	12557719	12557720	6419	.	.	.	.	.	.	.	.
CG9326-RC	chr2L	20783315	20783316	5343	.	.	.	.	.	.	.	.	.	.	.	.
CG17117-RE	chr3R	6469293	6469294	4906	.	.	.	.	.	.	.	.	.	.	.	.
CG17510-RA	.	.	.	.	.	.	.	.	.	.	.	.	.	.	.	.
CG8595-RA	chr2R	15728374	15728375	9624	.	.	.	.	.	.	.	.	.	.	.	.
CG31721-RA	.	.	.	.	.	.	.	.	.	.	.	.	.	.	.	.
CG1374-RA	.	.	.	.	.	.	.	.	.	.	.	.	.	.	.	.
CG12908-RA	.	.	.	.	.	.	.	.	.	.	.	.	.	.	.	.
CG1915-RC	.	.	.	.	.	.	.	.	.	.	.	.	.	.	.	.
CG2986-RE	.	.	.	.	.	.	.	.	.	.	.	.	.	.	.	.
CG17131-RB	.	.	.	.	.	.	.	.	.	.	.	.	.	.	.	.
CG10112-RA	chr2R	10391472	10391473	8574	.	.	.	.	.	.	.	.	.	.	.	.
CG5080-RB	.	.	.	.	.	.	.	.	.	.	.	.	.	.	.	.
CG10287-RA	.	.	.	.	.	.	.	.	.	.	.	.	.	.	.	.
CG7884-RA	.	.	.	.	.	.	.	.	.	.	.	.	.	.	.	.
CG3851-RA	.	.	.	.	.	.	.	.	.	.	.	.	.	.	.	.
CG30080-RA	.	.	.	.	.	.	.	.	.	.	.	.	.	.	.	.
CG3625-RB	.	.	.	.	.	.	.	.	.	.	.	.	.	.	.	.
CG1897-RA	chr3R	25373766	25373767	8342	.	.	.	.	.	.	.	.	.	.	.	.
CG3388-RA	chr2R	20944710	20944711	4792	.	.	.	.	.	.	.	.	.	.	.	.
CG32019-RE	.	.	.	.	.	.	.	.	.	.	.	.	.	.	.	.
CG5899-RB	.	.	.	.	.	.	.	.	.	.	.	.	.	.	.	.
CG12052-RA	chr2R	6422852	6422853	317	.	.	.	.	.	.	.	.	.	.	.	.
CG10521-RA	chrX	14643192	14643193	0	chrX	14642747	14642748	0	.	.	.	.	.	.	.	.
CG10067-RA	.	.	.	.	.	.	.	.	.	.	.	.	.	.	.	.
CG5779-RA	.	.	.	.	.	.	.	.	.	.	.	.	.	.	.	.
CG31020-RA	.	.	.	.	.	.	.	.	.	.	.	.	.	.	.	.
CG11527-RA	.	.	.	.	.	.	.	.	.	.	.	.	.	.	.	.
CG12653-RA	chrX	9580547	9580548	7673	chrX	9579800	9579801	8420	chrX	9578725	9578726	9495	.	.	.	.
CG8799-RA	.	.	.	.	.	.	.	.	.	.	.	.	.	.	.	.
CG34379-RD	.	.	.	.	.	.	.	.	.	.	.	.	.	.	.	.
CG1056-RB	.	.	.	.	.	.	.	.	.	.	.	.	.	.	.	.
CG12443-RA	.	.	.	.	.	.	.	.	.	.	.	.	.	.	.	.
CG31666-RD	.	.	.	.	.	.	.	.	.	.	.	.	.	.	.	.
CG2264-RB	chr2R	5943941	5943942	394	chr2R	5945423	5945424	0	chr2R	5943172	5943173	1163	.	.	.	.
CG12296-RA	chr3L	11003521	11003522	1601	.	.	.	.	.	.	.	.	.	.	.	.
CG1934-RA	.	.	.	.	.	.	.	.	.	.	.	.	.	.	.	.
CG4158-RA	.	.	.	.	.	.	.	.	.	.	.	.	.	.	.	.
CG11069-RA	.	.	.	.	.	.	.	.	.	.	.	.	.	.	.	.
CG4898-RB	chr3R	11106611	11106612	642	.	.	.	.	.	.	.	.	.	.	.	.
CG18024-RA	chr2L	8825446	8825447	178	chr2L	8832489	8832490	2818	chr2L	8841513	8841514	11842	chr2L	8842031	8842032	12360
CG17046-RC	.	.	.	.	.	.	.	.	.	.	.	.	.	.	.	.
CG9689-RA	.	.	.	.	.	.	.	.	.	.	.	.	.	.	.	.
CG33103-RC	.	.	.	.	.	.	.	.	.	.	.	.	.	.	.	.
CG3401-RA	.	.	.	.	.	.	.	.	.	.	.	.	.	.	.	.
CG1244-RB	.	.	.	.	.	.	.	.	.	.	.	.	.	.	.	.
CG12063-RA	.	.	.	.	.	.	.	.	.	.	.	.	.	.	.	.
CG9628-RB	chr3L	14625246	14625247	3976	chr3L	14625532	14625533	4262	.	.	.	.	.	.	.	.
CG10717-RA	chr3L	13371495	13371496	4371	.	.	.	.	.	.	.	.	.	.	.	.
CG31045-RF	chr3R	11924492	11924493	5222	chr3R	11925615	11925616	6345	.	.	.	.	.	.	.	.
CG9653-RA	chrX	7201745	7201746	228	chrX	7200186	7200187	1787	chrX	7195399	7195400	6574	chrX	7193930	7193931	8043
CG10325-RA	chr3R	12637612	12637613	0	chr3R	12674546	12674547	18776	.	.	.	.	.	.	.	.
CG9073-RA	.	.	.	.	.	.	.	.	.	.	.	.	.	.	.	.
CG33555-RG	chr3R	10645567	10645568	0	chr3R	10643813	10643814	0	.	.	.	.	.	.	.	.
CG4844-RA	.	.	.	.	.	.	.	.	.	.	.	.	.	.	.	.
CG10037-RA	.	.	.	.	.	.	.	.	.	.	.	.	.	.	.	.
CG6634-RA	chr2L	5461641	5461642	0	chr2L	5461323	5461324	317	chr2L	5458760	5458761	2880	.	.	.	.
CG3254-RA	.	.	.	.	.	.	.	.	.	.	.	.	.	.	.	.
CG2184-RB	.	.	.	.	.	.	.	.	.	.	.	.	.	.	.	.
CG4007-RA	chr2R	9046051	9046052	1191	chr2R	9055443	9055444	5108	.	.	.	.	.	.	.	.
CG9224-RA	.	.	.	.	.	.	.	.	.	.	.	.	.	.	.	.
CG33183-RA	.	.	.	.	.	.	.	.	.	.	.	.	.	.	.	.
CG10719-RC	chr2L	19161472	19161473	6094	chr2L	19158746	19158747	8820	chr2L	19156369	19156370	11197	.	.	.	.
CG2049-RG	.	.	.	.	.	.	.	.	.	.	.	.	.	.	.	.
CG11895-RA	.	.	.	.	.	.	.	.	.	.	.	.	.	.	.	.
CG7178-RA	.	.	.	.	.	.	.	.	.	.	.	.	.	.	.	.
CG2330-RA	.	.	.	.	.	.	.	.	.	.	.	.	.	.	.	.
CG1856-RA	.	.	.	.	.	.	.	.	.	.	.	.	.	.	.	.
CG11387-RA	chrX	7502099	7502100	1081	chrX	7497958	7497959	5222	.	.	.	.	.	.	.	.
CG18290-RA	chr3R	9263166	9263167	9354	.	.	.	.	.	.	.	.	.	.	.	.
CG14351-RA	.	.	.	.	.	.	.	.	.	.	.	.	.	.	.	.
CG15098-RA	chr2R	14734252	14734253	11982	.	.	.	.	.	.	.	.	.	.	.	.
CG9491-RC	chr2L	6323901	6323902	0	.	.	.	.	.	.	.	.	.	.	.	.
CG13194-RB	chr2R	7604164	7604165	0	.	.	.	.	.	.	.	.	.	.	.	.
CG3108-RA	chrX	5687687	5687688	12037	chrX	5691871	5691872	16221	chrX	5695132	5695133	19482	.	.	.	.
CG12311-RA	.	.	.	.	.	.	.	.	.	.	.	.	.	.	.	.
CG13920-RA	.	.	.	.	.	.	.	.	.	.	.	.	.	.	.	.
CG17228-RF	chr3R	7198188	7198189	0	chr3R	7198573	7198574	0	chr3R	7204381	7204382	0	chr3R	7179365	7179366	18343
CG4396-RA	chrX	12832367	12832368	233	.	.	.	.	.	.	.	.	.	.	.	.
CG31300-RA	.	.	.	.	.	.	.	.	.	.	.	.	.	.	.	.
CG1151-RA	.	.	.	.	.	.	.	.	.	.	.	.	.	.	.	.
CG7756-RA	.	.	.	.	.	.	.	.	.	.	.	.	.	.	.	.
CG5191-RC	.	.	.	.	.	.	.	.	.	.	.	.	.	.	.	.
CG1153-RA	.	.	.	.	.	.	.	.	.	.	.	.	.	.	.	.
CG17420-RD	.	.	.	.	.	.	.	.	.	.	.	.	.	.	.	.
CG7675-RA	.	.	.	.	.	.	.	.	.	.	.	.	.	.	.	.
CG8193-RA	.	.	.	.	.	.	.	.	.	.	.	.	.	.	.	.
CG1130-RA	.	.	.	.	.	.	.	.	.	.	.	.	.	.	.	.
CG12172-RA	chr2R	3027419	3027420	7783	.	.	.	.	.	.	.	.	.	.	.	.
CG8376-RA	.	.	.	.	.	.	.	.	.	.	.	.	.	.	.	.
CG5596-RB	chr3R	23468226	23468227	15058	.	.	.	.	.	.	.	.	.	.	.	.
CG15282-RA	.	.	.	.	.	.	.	.	.	.	.	.	.	.	.	.
CG32491-RG	chr3R	17199263	17199264	0	chr3R	17218822	17218823	15702	chr3R	17220019	17220020	16899	.	.	.	.
CG9611-RE	chr3R	9510687	9510688	10291	.	.	.	.	.	.	.	.	.	.	.	.
CG17927-RD	chr2L	16787755	16787756	0	.	.	.	.	.	.	.	.	.	.	.	.
CG2666-RB	.	.	.	.	.	.	.	.	.	.	.	.	.	.	.	.
CG32209-RB	.	.	.	.	.	.	.	.	.	.	.	.	.	.	.	.
CG18507-RB	.	.	.	.	.	.	.	.	.	.	.	.	.	.	.	.
CG7225-RA	chr2R	15150183	15150184	11763	.	.	.	.	.	.	.	.	.	.	.	.
CG13906-RA	chr3L	900525	900526	8613	.	.	.	.	.	.	.	.	.	.	.	.
CG6883-RA	chr3L	378266	378267	949	.	.	.	.	.	.	.	.	.	.	.	.
CG34416-RN	chr3L	7721512	7721513	14761	.	.	.	.	.	.	.	.	.	.	.	.
CG30413-RA	.	.	.	.	.	.	.	.	.	.	.	.	.	.	.	.
CG18783-RB	chr2L	6088479	6088480	2937	chr2L	6079096	6079097	12320	.	.	.	.	.	.	.	.
CG14470-RA	.	.	.	.	.	.	.	.	.	.	.	.	.	.	.	.
CG31813-RA	.	.	.	.	.	.	.	.	.	.	.	.	.	.	.	.
CG12210-RA	.	.	.	.	.	.	.	.	.	.	.	.	.	.	.	.
CG11049-RG	.	.	.	.	.	.	.	.	.	.	.	.	.	.	.	.
CG4467-RA	.	.	.	.	.	.	.	.	.	.	.	.	.	.	.	.
CG9660-RE	.	.	.	.	.	.	.	.	.	.	.	.	.	.	.	.
CG10382-RA	.	.	.	.	.	.	.	.	.	.	.	.	.	.	.	.
CG32150-RA	.	.	.	.	.	.	.	.	.	.	.	.	.	.	.	.
CG7526-RC	.	.	.	.	.	.	.	.	.	.	.	.	.	.	.	.
CG8587-RA	.	.	.	.	.	.	.	.	.	.	.	.	.	.	.	.
CG1342-RA	.	.	.	.	.	.	.	.	.	.	.	.	.	.	.	.
CG10591-RA	chr3L	5597381	5597382	4591	.	.	.	.	.	.	.	.	.	.	.	.
CG1157-RA	.	.	.	.	.	.	.	.	.	.	.	.	.	.	.	.
CG33715-RB	.	.	.	.	.	.	.	.	.	.	.	.	.	.	.	.
CG9614-RM	.	.	.	.	.	.	.	.	.	.	.	.	.	.	.	.
CG7816-RD	.	.	.	.	.	.	.	.	.	.	.	.	.	.	.	.
CG7283-RC	.	.	.	.	.	.	.	.	.	.	.	.	.	.	.	.
CG42684-RD	.	.	.	.	.	.	.	.	.	.	.	.	.	.	.	.
CG40263-RA	.	.	.	.	.	.	.	.	.	.	.	.	.	.	.	.
CG6024-RD	.	.	.	.	.	.	.	.	.	.	.	.	.	.	.	.
CG8493-RB	.	.	.	.	.	.	.	.	.	.	.	.	.	.	.	.
CG14253-RB	.	.	.	.	.	.	.	.	.	.	.	.	.	.	.	.
CG13377-RA	.	.	.	.	.	.	.	.	.	.	.	.	.	.	.	.
CG6611-RC	.	.	.	.	.	.	.	.	.	.	.	.	.	.	.	.
CG7847-RB	chr3R	13959655	13959656	185	.	.	.	.	.	.	.	.	.	.	.	.
CG9828-RB	chr2L	13177020	13177021	10950	.	.	.	.	.	.	.	.	.	.	.	.
CG15013-RA	.	.	.	.	.	.	.	.	.	.	.	.	.	.	.	.
CG9184-RA	chr3L	1334816	1334817	12013	.	.	.	.	.	.	.	.	.	.	.	.
CG6434-RA	.	.	.	.	.	.	.	.	.	.	.	.	.	.	.	.
CG31997-RA	.	.	.	.	.	.	.	.	.	.	.	.	.	.	.	.
CG13159-RA	.	.	.	.	.	.	.	.	.	.	.	.	.	.	.	.
CG32031-RC	chr3L	9037074	9037075	4887	chr3L	9035479	9035480	6482	chr3L	9034632	9034633	7329	chr3L	9034243	9034244	7718
CG8547-RB	chr2R	10158140	10158141	3020	.	.	.	.	.	.	.	.	.	.	.	.
CG15822-RB	.	.	.	.	.	.	.	.	.	.	.	.	.	.	.	.
CG17888-RF	.	.	.	.	.	.	.	.	.	.	.	.	.	.	.	.
CG3114-RH	.	.	.	.	.	.	.	.	.	.	.	.	.	.	.	.
CG3153-RA	.	.	.	.	.	.	.	.	.	.	.	.	.	.	.	.
CG17800-RBB	.	.	.	.	.	.	.	.	.	.	.	.	.	.	.	.
CG13475-RA	.	.	.	.	.	.	.	.	.	.	.	.	.	.	.	.
CG7047-RB	chr3L	162070	162071	14237	.	.	.	.	.	.	.	.	.	.	.	.
CG11502-RC	.	.	.	.	.	.	.	.	.	.	.	.	.	.	.	.
CG42280-RE	.	.	.	.	.	.	.	.	.	.	.	.	.	.	.	.
CG18004-RC	.	.	.	.	.	.	.	.	.	.	.	.	.	.	.	.
CG32490-RL	.	.	.	.	.	.	.	.	.	.	.	.	.	.	.	.
CG9739-RD	.	.	.	.	.	.	.	.	.	.	.	.	.	.	.	.
CG15427-RC	.	.	.	.	.	.	.	.	.	.	.	.	.	.	.	.
CG33991-RB	.	.	.	.	.	.	.	.	.	.	.	.	.	.	.	.
FlyExpress_Salm	chr2L	11445995	11445996	381	chr2L	11447798	11447799	2184	chr2L	11450691	11450692	5077	.	.	.	.
FlyExpress_Bun	chr2L	12529934	12529935	0	.	.	.	.	.	.	.	.	.	.	.	.
FlyExpress_CG15480	chr2L	13225403	13225404	197	chr2L	13227215	13227216	2009	chr2L	13235405	13235406	10199	chr2L	13245184	13245185	19978
FlyExpress_Su(H)	chr2L	15039353	15039354	134	chr2L	15038932	15038933	555	.	.	.	.	.	.	.	.
FlyExpress_Kel	chr2L	18150109	18150110	11899	.	.	.	.	.	.	.	.	.	.	.	.
FlyExpress_cad	chr2L	20770527	20770528	203	chr2L	20783315	20783316	180	.	.	.	.	.	.	.	.
FlyExpress_atet	.	.	.	.	.	.	.	.	.	.	.	.	.	.	.	.
FlyExpress_Rapgap1	.	.	.	.	.	.	.	.	.	.	.	.	.	.	.	.
FlyExpress_net	chr2L	89353	89354	1971	chr2L	91520	91521	4138	chr2L	91988	91989	4606	.	.	.	.
FlyExpress_Scat	chr2L	9449326	9449327	13985	.	.	.	.	.	.	.	.	.	.	.	.
Flyexpress_cyp310a1	.	.	.	.	.	.	.	.	.	.	.	.	.	.	.	.
FlyExpress_CG15094	chr2R	14690275	14690276	6092	.	.	.	.	.	.	.	.	.	.	.	.
FlyExpress_l(2)08717	chr2R	14690275	14690276	0	.	.	.	.	.	.	.	.	.	.	.	.
FlyExpress_CG5532	.	.	.	.	.	.	.	.	.	.	.	.	.	.	.	.
FlyExpress_CG2915	.	.	.	.	.	.	.	.	.	.	.	.	.	.	.	.
FlyExpress_Dap	chr2R	5602192	5602193	0	.	.	.	.	.	.	.	.	.	.	.	.
FlyExpress_inv	.	.	.	.	.	.	.	.	.	.	.	.	.	.	.	.
FlyExpress_Chrb	.	.	.	.	.	.	.	.	.	.	.	.	.	.	.	.
FlyExpress_CG9238	chr3L	14540178	14540179	0	.	.	.	.	.	.	.	.	.	.	.	.
FlyExpress_aos	chr3L	16484426	16484427	7676	chr3L	16468980	16468981	0	.	.	.	.	.	.	.	.
FlyExpress_CG2162	chr3L	3037895	3037896	0	.	.	.	.	.	.	.	.	.	.	.	.
FlyExpress_CG10479	chr3L	5975099	5975100	5992	chr3L	5976170	5976171	7063	chr3L	5976279	5976280	7172	chr3L	5987155	5987156	18048
FlyExpress_Dl	chr3R	15158054	15158055	6115	chr3R	15164946	15164947	13007	.	.	.	.	.	.	.	.
FlyExpress_bnl	.	.	.	.	.	.	.	.	.	.	.	.	.	.	.	.
FlyExpress_CG33099	chr3R	18353595	18353596	1046	.	.	.	.	.	.	.	.	.	.	.	.
FlyExpress_e(spl)m5-HLH	chr3R	21856502	21856503	1045	chr3R	21868052	21868053	12595	chr3R	21868630	21868631	13173	chr3R	21841124	21841125	13451
FlyExpress_Ama	chr3R	2588944	2588945	0	chr3R	2580238	2580239	8076	.	.	.	.	.	.	.	.
FlyExpress_CG11966	.	.	.	.	.	.	.	.	.	.	.	.	.	.	.	.
FlyExpress_CG12420	.	.	.	.	.	.	.	.	.	.	.	.	.	.	.	.
FlyExpress_yellow-e3	.	.	.	.	.	.	.	.	.	.	.	.	.	.	.	.
FlyExpress_mew	.	.	.	.	.	.	.	.	.	.	.	.	.	.	.	.
FlyExpress_rst	chrX	2876668	2876669	8803	chrX	2879520	2879521	11655	.	.	.	.	.	.	.	.

## Sheet: 40kb_Gene_to_Peak
#chr	start	end	feature.id_1	feature.id_2	feature.id_3	feature.id_4
chr2R	4959563	4959564	CG8084-RA	CG8193-RA	.	.
chr3R	12882217	12882218	CG3937-RB	.	.	.
chr2R	7084865	7084866	.	.	.	.
chr2L	8846878	8846879	CG18024-RA	.	.	.
chr3L	14143549	14143550	.	.	.	.
chr2L	8872575	8872576	.	.	.	.
chrX	7201745	7201746	CG9653-RA	.	.	.
chr3L	12642288	12642289	.	.	.	.
chr3L	900525	900526	CG13906-RA	.	.	.
chr3R	11925615	11925616	CG31045-RF	.	.	.
chr2L	518626	518627	CG2762-RA	.	.	.
chrX	7216230	7216231	CG9653-RA	.	.	.
chr2L	9146490	9146491	.	.	.	.
chr3L	14145113	14145114	.	.	.	.
chrX	7215050	7215051	CG9653-RA	.	.	.
chr3L	744524	744525	.	.	.	.
chr2R	5943941	5943942	CG2264-RB	CG12919-RA	CG2269-RC	.
chr3L	15032667	15032668	.	.	.	.
chrX	7187612	7187613	CG9653-RA	.	.	.
chr3L	14958126	14958127	.	.	.	.
chr3R	11244147	11244148	.	.	.	.
chr2R	7086553	7086554	.	.	.	.
chr2L	8842031	8842032	CG18024-RA	.	.	.
chr2L	20204591	20204592	.	.	.	.
chr2L	8849388	8849389	CG18024-RA	.	.	.
chr2L	19575963	19575964	CG10360-RB	.	.	.
chr3R	17431466	17431467	.	.	.	.
chr3L	699499	699500	.	.	.	.
chrX	7193930	7193931	CG9653-RA	.	.	.
chrX	5590793	5590794	.	.	.	.
chr2R	4958868	4958869	CG8084-RA	CG8193-RA	.	.
chr2L	91520	91521	FlyExpress_net	CG2674-RG	.	.
chr2L	12666270	12666271	.	.	.	.
chr2L	18895473	18895474	CG10619-RB	.	.	.
chr2R	5964776	5964777	CG12919-RA	CG2269-RC	CG2264-RB	.
chr3R	21472938	21472939	.	.	.	.
chr3L	21269968	21269969	.	.	.	.
chr3L	640490	640491	.	.	.	.
chr3L	14445769	14445770	.	.	.	.
chrX	8188244	8188245	.	.	.	.
chr3L	5849766	5849767	.	.	.	.
chr2L	249243	249244	CG3625-RB	.	.	.
chr2L	8876062	8876063	.	.	.	.
chr3R	2636547	2636548	.	.	.	.
chr3R	2588944	2588945	FlyExpress_Ama	CG1046-RA	CG1048-RA	.
chr2L	8416931	8416932	.	.	.	.
chr2L	13225403	13225404	FlyExpress_CG15480	.	.	.
chr3R	11854359	11854360	.	.	.	.
chr3L	18214359	18214360	.	.	.	.
chr3R	3467989	3467990	.	.	.	.
chr2L	20822813	20822814	CG9326-RC	.	.	.
chr3L	9849000	9849001	CG6721-RA	.	.	.
chr3R	3938777	3938778	.	.	.	.
chr3L	16171819	16171820	.	.	.	.
chr3R	5154744	5154745	.	.	.	.
chr3R	19712439	19712440	.	.	.	.
chr3R	397155	397156	.	.	.	.
chr2L	8825446	8825447	CG18024-RA	.	.	.
chr3R	25133011	25133012	.	.	.	.
chr3L	9032270	9032271	CG5133-RA	CG32031-RC	CG5187-RA	CG5093-RA
chr3L	11686023	11686024	.	.	.	.
chr2R	5943172	5943173	CG2264-RB	CG12919-RA	CG2269-RC	.
chr3R	2916973	2916974	.	.	.	.
chrX	17262828	17262829	.	.	.	.
chr3L	162070	162071	CG7047-RB	.	.	.
chr3R	5960211	5960212	CG3940-RA	.	.	.
chrX	12548561	12548562	CG2028-RC	.	.	.
chr3R	2934263	2934264	.	.	.	.
chr3L	14950036	14950037	.	.	.	.
chr2R	5378382	5378383	CG1916-RA	.	.	.
chr3R	16118438	16118439	.	.	.	.
chr3R	25373766	25373767	CG1897-RA	.	.	.
chr3R	11246479	11246480	.	.	.	.
chr2R	9467441	9467442	CG13333-RA	CG33156-RB	.	.
chrX	7195399	7195400	CG9653-RA	.	.	.
chr2L	19161472	19161473	CG10719-RC	CG17348-RA	.	.
chr3L	7903514	7903515	.	.	.	.
chr2R	6470052	6470053	.	.	.	.
chrX	21858561	21858562	.	.	.	.
chr3R	6442739	6442740	CG17117-RE	.	.	.
chr3L	8996581	8996582	CG5093-RA	CG5187-RA	CG5133-RA	.
chrX	19660005	19660006	.	.	.	.
chr2R	20944710	20944711	CG3388-RA	.	.	.
chr3R	21856502	21856503	FlyExpress_e(spl)m5-HLH	CG8384-RA	.	.
chr2R	11017260	11017261	.	.	.	.
chr2R	6470932	6470933	.	.	.	.
chrX	5793939	5793940	.	.	.	.
chr2L	11447798	11447799	FlyExpress_Salm	CG4922-RA	.	.
chrX	19192424	19192425	.	.	.	.
chr2L	2451128	2451129	.	.	.	.
chr2R	17536634	17536635	CG10082-RB	CG42365-RA	.	.
chr2R	8846263	8846264	.	.	.	.
chr2R	5945423	5945424	CG2264-RB	CG12919-RA	CG2269-RC	.
chr2L	21629319	21629320	.	.	.	.
chr2L	2454829	2454830	.	.	.	.
chr3L	9035479	9035480	CG5133-RA	CG32031-RC	CG5187-RA	CG5093-RA
chrX	8307084	8307085	.	.	.	.
chr3L	9033834	9033835	CG5133-RA	CG32031-RC	CG5187-RA	CG5093-RA
chr2R	17252224	17252225	CG15671-RA	.	.	.
chr3R	17273421	17273422	.	.	.	.
chrX	7186407	7186408	CG9653-RA	.	.	.
chr2L	12011953	12011954	.	.	.	.
chrX	5641219	5641220	CG3108-RA	.	.	.
chr2R	19094615	19094616	.	.	.	.
chr3L	2385879	2385880	CG13800-RA	.	.	.
chr3L	6760307	6760308	CG10037-RA	.	.	.
chr2L	8841513	8841514	CG18024-RA	.	.	.
chr2L	12007443	12007444	.	.	.	.
chr3L	5987155	5987156	FlyExpress_CG10479	.	.	.
chr3L	2438348	2438349	.	.	.	.
chr3R	2549554	2549555	CG1048-RA	CG1046-RA	FlyExpress_Ama	.
chr3R	5205073	5205074	.	.	.	.
chr2R	15954265	15954266	.	.	.	.
chrX	7200186	7200187	CG9653-RA	.	.	.
chr2L	15478477	15478478	.	.	.	.
chr2L	2457153	2457154	.	.	.	.
chr2R	8883838	8883839	.	.	.	.
chr3R	24889099	24889100	.	.	.	.
chr2L	11450691	11450692	FlyExpress_Salm	CG4922-RA	.	.
chr3L	19901836	19901837	.	.	.	.
chrX	3671474	3671475	CG2947-RB	.	.	.
chr3R	265	266	.	.	.	.
chrX	8785925	8785926	.	.	.	.
chr3R	19169169	19169170	CG4408-RA	.	.	.
chr2R	5602192	5602193	FlyExpress_Dap	.	.	.
chr3R	12774464	12774465	.	.	.	.
chr3L	9037074	9037075	CG5133-RA	CG32031-RC	CG5187-RA	CG5093-RA
chr3L	9848010	9848011	CG6721-RA	.	.	.
chrX	7122990	7122991	.	.	.	.
chr2R	11015555	11015556	.	.	.	.
chr2L	6088479	6088480	CG18783-RB	CG31641-RC	.	.
chr2L	19576985	19576986	CG10360-RB	.	.	.
chr3L	3374188	3374189	.	.	.	.
chr3R	17442134	17442135	.	.	.	.
chr2L	11445995	11445996	FlyExpress_Salm	.	.	.
chr3L	2867746	2867747	.	.	.	.
chr3L	14961201	14961202	.	.	.	.
chr2L	13851169	13851170	.	.	.	.
chr3L	5976170	5976171	FlyExpress_CG10479	.	.	.
chr3R	16078934	16078935	.	.	.	.
chr2L	19865729	19865730	.	.	.	.
chr3L	21469834	21469835	CG7540-RA	.	.	.
chr2R	20995332	20995333	CG16778-RC	.	.	.
chr3L	1479189	1479190	.	.	.	.
chrX	3673905	3673906	CG2947-RB	.	.	.
chr2L	2449047	2449048	.	.	.	.
chr2L	6724456	6724457	.	.	.	.
chr2R	7079321	7079322	.	.	.	.
chr3R	25596904	25596905	CG33956-RD	.	.	.
chr3L	3037895	3037896	FlyExpress_CG2162	.	.	.
chr2R	17255140	17255141	CG15671-RA	.	.	.
chr2R	7071092	7071093	.	.	.	.
chr3R	12067209	12067210	.	.	.	.
chrX	18137619	18137620	.	.	.	.
chr3L	15038510	15038511	.	.	.	.
chr3L	8668945	8668946	.	.	.	.
chr2R	5729980	5729981	.	.	.	.
chr3R	15861864	15861865	.	.	.	.
chr3L	5850332	5850333	.	.	.	.
chr2L	18890339	18890340	CG10619-RB	.	.	.
chr3R	19555969	19555970	.	.	.	.
chr2R	8879357	8879358	.	.	.	.
chrX	6588703	6588704	.	.	.	.
chr3R	7204381	7204382	CG17228-RF	.	.	.
chr3R	25409361	25409362	CG1897-RA	.	.	.
chr2R	13689401	13689402	.	.	.	.
chr3L	13067575	13067576	.	.	.	.
chr3L	16484426	16484427	FlyExpress_aos	.	.	.
chr2L	6079096	6079097	CG18783-RB	CG31641-RC	.	.
chrX	9580547	9580548	CG12653-RA	CG32697-RA	.	.
chr3R	2817792	2817793	.	.	.	.
chr3L	14129104	14129105	.	.	.	.
chr2L	8365861	8365862	.	.	.	.
chrX	15780837	15780838	.	.	.	.
chr2R	15614438	15614439	.	.	.	.
chrX	7831924	7831925	.	.	.	.
chr2R	17390243	17390244	.	.	.	.
chr3R	16655690	16655691	.	.	.	.
chr2L	1954697	1954698	.	.	.	.
chr2R	17411491	17411492	CG10079-RB	.	.	.
chr3L	16468980	16468981	FlyExpress_aos	.	.	.
chr3R	12456538	12456539	.	.	.	.
chr3R	4293619	4293620	CG45263-RA	.	.	.
chr2R	12527682	12527683	.	.	.	.
chr3R	2892933	2892934	.	.	.	.
chr3R	15158054	15158055	FlyExpress_Dl	.	.	.
chr3L	5862838	5862839	.	.	.	.
chr2R	13709901	13709902	.	.	.	.
chr3R	18498857	18498858	.	.	.	.
chr2R	19460607	19460608	.	.	.	.
chr3L	16037005	16037006	.	.	.	.
chr3R	23468226	23468227	CG5596-RB	.	.	.
chr2R	20401610	20401611	.	.	.	.
chr2R	17362848	17362849	.	.	.	.
chr2R	7604164	7604165	CG13194-RB	.	.	.
chr2L	12010526	12010527	.	.	.	.
chr2L	2454072	2454073	.	.	.	.
chr3R	23757428	23757429	.	.	.	.
chr2R	17362357	17362358	.	.	.	.
chr3L	14139541	14139542	.	.	.	.
chrX	17683690	17683691	.	.	.	.
chrX	8936219	8936220	.	.	.	.
chr3L	698637	698638	.	.	.	.
chr2L	10056990	10056991	.	.	.	.
chrX	2359943	2359944	.	.	.	.
chr2L	481272	481273	.	.	.	.
chr3R	16369035	16369036	CG5191-RC	.	.	.
chr2R	2550773	2550774	.	.	.	.
chr3L	11580356	11580357	.	.	.	.
chr2R	4543280	4543281	.	.	.	.
chr3R	11494862	11494863	CG5399-RA	.	.	.
chr3R	4031460	4031461	.	.	.	.
chr2R	2404102	2404103	.	.	.	.
chrX	13263707	13263708	.	.	.	.
chr3L	21019622	21019623	.	.	.	.
chr2L	15319925	15319926	.	.	.	.
chrX	2879520	2879521	FlyExpress_rst	.	.	.
chr2L	19137009	19137010	CG10719-RC	.	.	.
chrX	12644575	12644576	.	.	.	.
chr2L	16286633	16286634	.	.	.	.
chr3R	27047079	27047080	.	.	.	.
chr2R	13935510	13935511	.	.	.	.
chr3R	15164946	15164947	FlyExpress_Dl	.	.	.
chr2R	16215512	16215513	.	.	.	.
chr2L	13235405	13235406	FlyExpress_CG15480	.	.	.
chr3R	11860019	11860020	.	.	.	.
chr2L	19324875	19324876	.	.	.	.
chrX	4317930	4317931	.	.	.	.
chr3R	12893645	12893646	CG3937-RB	.	.	.
chr2L	18783350	18783351	.	.	.	.
chr3R	14447047	14447048	.	.	.	.
chr2L	16859209	16859210	.	.	.	.
chr3R	12528848	12528849	.	.	.	.
chrX	9445155	9445156	.	.	.	.
chr2L	15324500	15324501	.	.	.	.
chr2L	13549170	13549171	.	.	.	.
chr3R	16118849	16118850	.	.	.	.
chrX	5584555	5584556	.	.	.	.
chr2R	8883117	8883118	.	.	.	.
chr3L	5987431	5987432	FlyExpress_CG10479	.	.	.
chr3R	4856038	4856039	CG11988-RA	.	.	.
chr3R	12229329	12229330	.	.	.	.
chr3L	9010275	9010276	CG5187-RA	CG5093-RA	CG5133-RA	CG32031-RC
chr3L	8998185	8998186	CG5093-RA	CG5187-RA	CG5133-RA	.
chr2L	12011095	12011096	.	.	.	.
chr3R	864836	864837	.	.	.	.
chr2R	3940305	3940306	.	.	.	.
chr2L	12461144	12461145	CG5442-RA	.	.	.
chr3L	16037529	16037530	.	.	.	.
chr2R	8906966	8906967	.	.	.	.
chr3R	913029	913030	.	.	.	.
chrX	19783175	19783176	.	.	.	.
chr4	717483	717484	CG32019-RE	.	.	.
chr3R	14814204	14814205	.	.	.	.
chr2R	20770210	20770211	.	.	.	.
chrX	16531592	16531593	.	.	.	.
chr2L	9150217	9150218	.	.	.	.
chr3R	12589628	12589629	.	.	.	.
chr3L	15037250	15037251	.	.	.	.
chr3R	12544656	12544657	.	.	.	.
chr3R	7603930	7603931	.	.	.	.
chr3L	8500377	8500378	.	.	.	.
chr3R	8471765	8471766	CG6234-RA	CG6753-RA	.	.
chrX	5795734	5795735	.	.	.	.
chr2L	7519888	7519889	.	.	.	.
chrX	16549930	16549931	.	.	.	.
chr3L	8072913	8072914	CG34373-RG	.	.	.
chr3L	2881792	2881793	.	.	.	.
chr3R	10481001	10481002	.	.	.	.
chr3R	20692751	20692752	CG7005-RA	CG11069-RA	.	.
chr3R	12887711	12887712	CG3937-RB	.	.	.
chr3R	21325796	21325797	CG5099-RB	.	.	.
chr2R	17250948	17250949	CG15671-RA	.	.	.
chr2R	12047621	12047622	CG8434-RA	.	.	.
chrX	12557719	12557720	CG2028-RC	.	.	.
chr3R	25111826	25111827	.	.	.	.
chrX	1128135	1128136	.	.	.	.
chr3R	14754344	14754345	.	.	.	.
chrX	2876668	2876669	FlyExpress_rst	.	.	.
chr2R	5329004	5329005	.	.	.	.
chr3L	2439248	2439249	.	.	.	.
chr2L	16601760	16601761	.	.	.	.
chrX	6716815	6716816	.	.	.	.
chr3R	10282964	10282965	.	.	.	.
chrX	17402590	17402591	.	.	.	.
chr2R	16013873	16013874	.	.	.	.
chr3R	1474298	1474299	.	.	.	.
chrX	20565158	20565159	.	.	.	.
chr3R	10679871	10679872	CG33555-RG	.	.	.
chrX	21239958	21239959	.	.	.	.
chr3L	319749	319750	.	.	.	.
chr2R	8872670	8872671	.	.	.	.
chr3R	7824045	7824046	.	.	.	.
chr2L	11358554	11358555	.	.	.	.
chrX	8189447	8189448	.	.	.	.
chr2L	17222440	17222441	.	.	.	.
chr3R	6783246	6783247	.	.	.	.
chr2R	19462206	19462207	.	.	.	.
chr2L	2449953	2449954	.	.	.	.
chrX	6443944	6443945	.	.	.	.
chr3R	4013330	4013331	.	.	.	.
chr3L	9034243	9034244	CG5133-RA	CG32031-RC	CG5187-RA	CG5093-RA
chr3R	19169578	19169579	CG4408-RA	.	.	.
chr3R	14816768	14816769	.	.	.	.
chrX	19658856	19658857	.	.	.	.
chrX	15850392	15850393	.	.	.	.
chr3R	12887385	12887386	CG3937-RB	.	.	.
chr3L	22260225	22260226	.	.	.	.
chrX	8569073	8569074	.	.	.	.
chr3L	14124816	14124817	.	.	.	.
chr2R	4535899	4535900	.	.	.	.
chr3R	12906836	12906837	CG3937-RB	.	.	.
chr3R	19172142	19172143	CG4408-RA	.	.	.
chr2R	18690912	18690913	.	.	.	.
chr3L	9034632	9034633	CG5133-RA	CG32031-RC	CG5187-RA	CG5093-RA
chr3L	5975099	5975100	FlyExpress_CG10479	.	.	.
chr2L	15330872	15330873	.	.	.	.
chr3L	9415795	9415796	.	.	.	.
chr2L	9602293	9602294	.	.	.	.
chr3L	22396090	22396091	.	.	.	.
chr2L	12529934	12529935	FlyExpress_Bun	.	.	.
chr3R	837	838	.	.	.	.
chrX	5589778	5589779	.	.	.	.
chr3L	21278866	21278867	.	.	.	.
chr3R	5811619	5811620	.	.	.	.
chrX	17071987	17071988	CG5055-RB	.	.	.
chr3R	1037154	1037155	.	.	.	.
chr2R	17211310	17211311	.	.	.	.
chr3R	13959655	13959656	CG7847-RB	.	.	.
chr2L	5239877	5239878	CG14025-RC	.	.	.
chr3L	639829	639830	.	.	.	.
chr3R	1414068	1414069	.	.	.	.
chr2L	523080	523081	CG2762-RA	.	.	.
chr2R	3918566	3918567	.	.	.	.
chr3L	4230537	4230538	CG15010-RA	.	.	.
chr3R	2580238	2580239	CG1046-RA	FlyExpress_Ama	CG1048-RA	.
chrX	9176840	9176841	.	.	.	.
chrX	4319122	4319123	.	.	.	.
chr2R	595299	595300	.	.	.	.
chr2L	14435949	14435950	.	.	.	.
chr3R	12378056	12378057	.	.	.	.
chrX	8189854	8189855	.	.	.	.
chr2L	5461641	5461642	CG6634-RA	.	.	.
chr2L	2945966	2945967	.	.	.	.
chr3L	762263	762264	.	.	.	.
chr2L	9121101	9121102	.	.	.	.
chr3R	1438298	1438299	.	.	.	.
chr3R	8472086	8472087	CG6234-RA	CG6753-RA	.	.
chrX	1718048	1718049	CG42666-RC	.	.	.
chr3R	18353595	18353596	FlyExpress_CG33099	.	.	.
chr2R	20743008	20743009	.	.	.	.
chr2L	6323901	6323902	CG9491-RC	.	.	.
chr3R	3282792	3282793	.	.	.	.
chr2R	17363360	17363361	.	.	.	.
chr3R	13430902	13430903	.	.	.	.
chr3R	8837918	8837919	CG7756-RA	.	.	.
chr3L	5853503	5853504	.	.	.	.
chr2L	8832489	8832490	CG18024-RA	.	.	.
chr2L	15323573	15323574	.	.	.	.
chr3R	12674546	12674547	CG10325-RA	.	.	.
chr2L	16817404	16817405	.	.	.	.
chr3L	14146196	14146197	.	.	.	.
chr2L	8276627	8276628	.	.	.	.
chr3L	21472802	21472803	CG7540-RA	.	.	.
chr2L	9449326	9449327	CG3779-RA	FlyExpress_Scat	.	.
chr3R	3939887	3939888	.	.	.	.
chr3R	683895	683896	.	.	.	.
chr3L	2429131	2429132	.	.	.	.
chr3R	12056206	12056207	.	.	.	.
chr3L	14170756	14170757	CG33991-RB	.	.	.
chr3R	17432624	17432625	.	.	.	.
chr2R	9335554	9335555	.	.	.	.
chr2L	19135351	19135352	CG10719-RC	.	.	.
chrX	6883107	6883108	.	.	.	.
chr2R	14560881	14560882	.	.	.	.
chr2L	4821278	4821279	.	.	.	.
chr3R	9638595	9638596	.	.	.	.
chr2R	7072242	7072243	.	.	.	.
chr3R	11897775	11897776	CG31045-RF	.	.	.
chr2R	5180166	5180167	CG2049-RG	.	.	.
chr2L	18875263	18875264	CG10619-RB	.	.	.
chr3R	11855352	11855353	.	.	.	.
chrX	3735875	3735876	.	.	.	.
chr3R	9510687	9510688	CG9611-RE	CG34383-RC	.	.
chr3L	22169811	22169812	.	.	.	.
chr3R	12057569	12057570	.	.	.	.
chr2R	18578151	18578152	.	.	.	.
chrX	417476	417477	.	.	.	.
chr2L	8415799	8415800	.	.	.	.
chrX	9360626	9360627	.	.	.	.
chrX	2018210	2018211	CG18412-RA	.	.	.
chr3R	2826727	2826728	.	.	.	.
chr2R	7905297	7905298	.	.	.	.
chr3R	12884871	12884872	CG3937-RB	.	.	.
chrX	9638283	9638284	.	.	.	.
chr2L	4893741	4893742	.	.	.	.
chr3L	14540178	14540179	FlyExpress_CG9238	.	.	.
chr3R	7198573	7198574	CG17228-RF	.	.	.
chrX	7853141	7853142	.	.	.	.
chr3R	12783634	12783635	.	.	.	.
chr2R	5965706	5965707	CG12919-RA	CG2269-RC	CG2264-RB	.
chrX	22257134	22257135	.	.	.	.
chr3R	7179365	7179366	CG17228-RF	.	.	.
chr3R	8471139	8471140	CG6234-RA	CG6753-RA	.	.
chrX	13564833	13564834	CG11164-RA	.	.	.
chr3L	8826150	8826151	.	.	.	.
chr3R	11820189	11820190	.	.	.	.
chr2R	3306271	3306272	CG17800-RBB	.	.	.
chr2R	7087312	7087313	.	.	.	.
chr3L	10850955	10850956	.	.	.	.
chr3R	21021124	21021125	CG13653-RA	CG13654-RA	CG11849-RA	CG11851-RA
chr3L	9449143	9449144	.	.	.	.
chr2L	7038695	7038696	.	.	.	.
chr2L	13227215	13227216	FlyExpress_CG15480	.	.	.
chr2L	2448472	2448473	.	.	.	.
chr2R	4872646	4872647	.	.	.	.
chr2R	17138292	17138293	CG4302-RA	.	.	.
chr2R	12038295	12038296	CG8434-RA	.	.	.
chr2L	1420247	1420248	CG5481-RA	.	.	.
chr3L	22393441	22393442	.	.	.	.
chr2L	8416161	8416162	.	.	.	.
chr2L	13905227	13905228	CG8827-RA	CG16869-RA	.	.
chrX	7211289	7211290	CG9653-RA	.	.	.
chr2L	9988507	9988508	.	.	.	.
chr3R	14380550	14380551	.	.	.	.
chr2L	9167150	9167151	.	.	.	.
chr2L	20783315	20783316	CG9326-RC	FlyExpress_cad	.	.
chrX	10716877	10716878	CG1691-RF	.	.	.
chr2R	10921923	10921924	.	.	.	.
chr2L	7420061	7420062	.	.	.	.
chrX	14642747	14642748	CG10521-RA	.	.	.
chr3R	4007324	4007325	.	.	.	.
chr3L	12640693	12640694	.	.	.	.
chr2R	2020358	2020359	.	.	.	.
chr3R	6469293	6469294	CG17117-RE	.	.	.
chr2R	9457102	9457103	CG13333-RA	CG33156-RB	.	.
chr3L	11546228	11546229	.	.	.	.
chr3L	682632	682633	.	.	.	.
chr3L	10856136	10856137	.	.	.	.
chr3L	15033653	15033654	.	.	.	.
chrX	8331575	8331576	.	.	.	.
chr2R	17138739	17138740	CG4302-RA	.	.	.
chr2L	11807159	11807160	CG14938-RD	.	.	.
chr3R	11810712	11810713	.	.	.	.
chr2R	8867911	8867912	.	.	.	.
chrX	19742907	19742908	.	.	.	.
chr2R	17251583	17251584	CG15671-RA	.	.	.
chr2R	6446420	6446421	CG12052-RA	.	.	.
chr3L	19172580	19172581	.	.	.	.
chr3L	16005724	16005725	.	.	.	.
chr3R	3944086	3944087	.	.	.	.
chr3L	6814430	6814431	CG10037-RA	.	.	.
chr2L	19323862	19323863	.	.	.	.
chr3R	20098396	20098397	CG13610-RA	.	.	.
chrX	15705985	15705986	CG32581-RB	CG8974-RA	.	.
chr2L	19791243	19791244	.	.	.	.
chr2R	9471674	9471675	CG13333-RA	CG33156-RB	.	.
chr3R	13275185	13275186	.	.	.	.
chr2L	18839494	18839495	.	.	.	.
chr2L	17752422	17752423	.	.	.	.
chr2L	15732174	15732175	CG3938-RB	.	.	.
chr3L	13371495	13371496	CG10717-RA	.	.	.
chrX	7854645	7854646	.	.	.	.
chr2R	16533924	16533925	.	.	.	.
chr2R	11563951	11563952	CG30080-RA	.	.	.
chr3L	12685910	12685911	.	.	.	.
chr2R	11563323	11563324	CG30080-RA	.	.	.
chr3R	10645567	10645568	CG33555-RG	.	.	.
chr2L	89353	89354	FlyExpress_net	CG2674-RG	.	.
chrX	1134058	1134059	.	.	.	.
chr3R	25115132	25115133	.	.	.	.
chr3R	11924492	11924493	CG31045-RF	.	.	.
chr3R	7178692	7178693	CG17228-RF	.	.	.
chr3L	9013891	9013892	CG5187-RA	CG5093-RA	CG5133-RA	CG32031-RC
chrX	13262611	13262612	.	.	.	.
chr2R	16801662	16801663	CG10067-RA	.	.	.
chrX	21342630	21342631	.	.	.	.
chr2L	5461323	5461324	CG6634-RA	.	.	.
chr2L	18150109	18150110	FlyExpress_Kel	.	.	.
chr2R	11266274	11266275	.	.	.	.
chr2L	3822774	3822775	.	.	.	.
chr2R	15921164	15921165	.	.	.	.
chr2L	14512775	14512776	.	.	.	.
chr2R	2873286	2873287	.	.	.	.
chr2R	9472194	9472195	CG13333-RA	CG33156-RB	.	.
chrX	12636090	12636091	.	.	.	.
chrX	4484161	4484162	CG12212-RA	.	.	.
chr3L	15658730	15658731	.	.	.	.
chr2R	7070145	7070146	.	.	.	.
chr3R	5705463	5705464	.	.	.	.
chr3L	22938139	22938140	.	.	.	.
chr2L	13049006	13049007	.	.	.	.
chr2L	19156369	19156370	CG10719-RC	CG17348-RA	.	.
chr2R	17250562	17250563	CG15671-RA	.	.	.
chr2R	15423248	15423249	.	.	.	.
chr2R	10898409	10898410	.	.	.	.
chr3L	21873757	21873758	.	.	.	.
chr2L	5458760	5458761	CG6634-RA	.	.	.
chrX	580814	580815	CG16983-RF	.	.	.
chr3R	12878700	12878701	.	.	.	.
chr2L	5306627	5306628	CG14025-RC	.	.	.
chr3L	9012699	9012700	CG5187-RA	CG5093-RA	CG5133-RA	CG32031-RC
chr2L	5799393	5799394	.	.	.	.
chrX	8936774	8936775	.	.	.	.
chr2L	15320489	15320490	.	.	.	.
chr3L	11003521	11003522	CG12296-RA	.	.	.
chrX	19645163	19645164	.	.	.	.
chr2R	6471921	6471922	.	.	.	.
chrX	7841120	7841121	.	.	.	.
chr3L	11230167	11230168	CG7590-RA	.	.	.
chr3L	18396303	18396304	.	.	.	.
chr2L	10003795	10003796	.	.	.	.
chr2L	13548206	13548207	.	.	.	.
chr2L	20770527	20770528	FlyExpress_cad	CG9326-RC	.	.
chr3R	2826525	2826526	.	.	.	.
chr3R	7198188	7198189	CG17228-RF	.	.	.
chr3R	11413227	11413228	.	.	.	.
chr3R	12637612	12637613	CG10325-RA	.	.	.
chr3R	25590063	25590064	CG33956-RD	.	.	.
chr2R	6471318	6471319	.	.	.	.
chr2R	17211063	17211064	.	.	.	.
chr2R	20688449	20688450	.	.	.	.
chrX	511694	511695	CG16983-RF	.	.	.
chrX	1293789	1293790	.	.	.	.
chrX	1935722	1935723	.	.	.	.
chrX	3636532	3636533	.	.	.	.
chrX	6879808	6879809	.	.	.	.
chrX	8936430	8936431	.	.	.	.
chrX	8942133	8942134	.	.	.	.
chrX	11923080	11923081	.	.	.	.
chrX	12646063	12646064	.	.	.	.
chrX	14643192	14643193	CG10521-RA	.	.	.
chrX	17724837	17724838	.	.	.	.
chr3L	224839	224840	.	.	.	.
chr3L	258276	258277	.	.	.	.
chr3L	378266	378267	CG6883-RA	.	.	.
chr3L	668732	668733	.	.	.	.
chr3L	779709	779710	.	.	.	.
chr3L	872570	872571	CG13906-RA	.	.	.
chr3L	1334816	1334817	CG9184-RA	.	.	.
chr3L	1352218	1352219	CG9184-RA	.	.	.
chr3L	1731131	1731132	CG7995-RD	CG12011-RA	.	.
chr3L	2437114	2437115	.	.	.	.
chr3L	3197621	3197622	.	.	.	.
chr3L	3411435	3411436	.	.	.	.
chr3L	3593871	3593872	.	.	.	.
chr3L	4252359	4252360	CG15010-RA	.	.	.
chr3L	4253025	4253026	CG15010-RA	.	.	.
chr3L	5597381	5597382	CG10591-RA	.	.	.
chr3L	5729345	5729346	.	.	.	.
chr3L	5976279	5976280	FlyExpress_CG10479	.	.	.
chr3L	6178025	6178026	CG10236-RA	.	.	.
chr3L	6182216	6182217	CG10236-RA	.	.	.
chr3L	6274529	6274530	.	.	.	.
chr3L	6282219	6282220	.	.	.	.
chr3L	6384251	6384252	.	.	.	.
chr3L	6389626	6389627	.	.	.	.
chr3L	6757987	6757988	CG10037-RA	.	.	.
chr3L	7721512	7721513	CG34416-RN	.	.	.
chr3L	8068112	8068113	CG34373-RG	.	.	.
chr3L	8100462	8100463	CG34373-RG	.	.	.
chr3L	8109198	8109199	CG34373-RG	.	.	.
chr3L	8569167	8569168	.	.	.	.
chr3L	8819138	8819139	.	.	.	.
chr3L	8820343	8820344	.	.	.	.
chr3L	8826657	8826658	.	.	.	.
chr3L	9146200	9146201	.	.	.	.
chr3L	9428666	9428667	.	.	.	.
chr3L	9454339	9454340	.	.	.	.
chr3L	10311902	10311903	.	.	.	.
chr3L	10388651	10388652	.	.	.	.
chr3L	10804184	10804185	.	.	.	.
chr3L	10850425	10850426	.	.	.	.
chr3L	11112986	11112987	.	.	.	.
chr3L	11125332	11125333	.	.	.	.
chr3L	11128309	11128310	.	.	.	.
chr3L	11203690	11203691	.	.	.	.
chr3L	11672476	11672477	.	.	.	.
chr3L	12293170	12293171	.	.	.	.
chr3L	12329610	12329611	.	.	.	.
chr3L	12463668	12463669	.	.	.	.
chr3L	12507947	12507948	.	.	.	.
chr3L	12602884	12602885	.	.	.	.
chr3L	12690916	12690917	.	.	.	.
chr3L	12698587	12698588	.	.	.	.
chr3L	13025341	13025342	.	.	.	.
chr3L	13113592	13113593	.	.	.	.
chr3L	13221119	13221120	.	.	.	.
chr3L	13957847	13957848	.	.	.	.
chr3L	14044193	14044194	.	.	.	.
chr3L	14625246	14625247	CG9628-RB	CG13475-RA	.	.
chr3L	14625532	14625533	CG9628-RB	CG13475-RA	.	.
chr3L	15087895	15087896	.	.	.	.
chr3L	15168445	15168446	.	.	.	.
chr3L	15255520	15255521	.	.	.	.
chr3L	15323700	15323701	CG7250-RA	.	.	.
chr3L	15696708	15696709	.	.	.	.
chr3L	15976116	15976117	.	.	.	.
chr3L	16359654	16359655	.	.	.	.
chr3L	16577311	16577312	.	.	.	.
chr3L	16581569	16581570	.	.	.	.
chr3L	17469069	17469070	.	.	.	.
chr3L	17507223	17507224	.	.	.	.
chr3L	17527553	17527554	.	.	.	.
chr3L	19889586	19889587	.	.	.	.
chr3L	19890426	19890427	.	.	.	.
chr3L	19908083	19908084	.	.	.	.
chr3L	20369134	20369135	.	.	.	.
chr3L	20671721	20671722	.	.	.	.
chr3L	21018544	21018545	.	.	.	.
chr3L	21060642	21060643	CG32434-RC	.	.	.
chr3L	21426454	21426455	.	.	.	.
chr3L	21633945	21633946	.	.	.	.
chr3L	21721902	21721903	.	.	.	.
chr3L	22187451	22187452	.	.	.	.
chr3L	22396569	22396570	.	.	.	.
chr3L	22856967	22856968	CG8385-RH	.	.	.
chr2L	91988	91989	FlyExpress_net	CG2674-RG	.	.
chr2L	161192	161193	.	.	.	.
chr2L	161903	161904	.	.	.	.
chr2L	1076541	1076542	.	.	.	.
chr2L	1119150	1119151	.	.	.	.
chr2L	1366273	1366274	.	.	.	.
chr2L	1518058	1518059	CG14351-RA	.	.	.
chr2L	2164877	2164878	CG3166-RB	.	.	.
chr2L	2577170	2577171	.	.	.	.
chr2L	2885149	2885150	CG2986-RE	.	.	.
chr2L	3080598	3080599	CG9660-RE	.	.	.
chr2L	3566593	3566594	.	.	.	.
chr2L	3771884	3771885	.	.	.	.
chr2L	3862633	3862634	.	.	.	.
chr2L	4597833	4597834	CG33196-RC	.	.	.
chr2L	4811831	4811832	.	.	.	.
chr2L	5325211	5325212	.	.	.	.
chr2L	5877798	5877799	.	.	.	.
chr2L	6133520	6133521	CG31641-RC	.	.	.
chr2L	6134089	6134090	CG31641-RC	.	.	.
chr2L	6498531	6498532	.	.	.	.
chr2L	6967710	6967711	CG3423-RA	.	.	.
chr2L	6968000	6968001	CG3423-RA	.	.	.
chr2L	7306941	7306942	.	.	.	.
chr2L	7498389	7498390	.	.	.	.
chr2L	7799888	7799889	.	.	.	.
chr2L	8302970	8302971	.	.	.	.
chr2L	8511829	8511830	.	.	.	.
chr2L	8521989	8521990	.	.	.	.
chr2L	8675792	8675793	.	.	.	.
chr2L	8997547	8997548	CG18088-RA	.	.	.
chr2L	9758014	9758015	.	.	.	.
chr2L	10396347	10396348	.	.	.	.
chr2L	10396755	10396756	.	.	.	.
chr2L	10647830	10647831	.	.	.	.
chr2L	10732525	10732526	.	.	.	.
chr2L	10858131	10858132	.	.	.	.
chr2L	11269037	11269038	.	.	.	.
chr2L	12004013	12004014	.	.	.	.
chr2L	12436393	12436394	CG5442-RA	.	.	.
chr2L	13177020	13177021	CG9828-RB	.	.	.
chr2L	13245184	13245185	FlyExpress_CG15480	.	.	.
chr2L	13264032	13264033	FlyExpress_CG15480	.	.	.
chr2L	14261982	14261983	CG15288-RB	.	.	.
chr2L	14445881	14445882	.	.	.	.
chr2L	15038932	15038933	FlyExpress_Su(H)	.	.	.
chr2L	15039353	15039354	FlyExpress_Su(H)	.	.	.
chr2L	15324712	15324713	.	.	.	.
chr2L	15467909	15467910	.	.	.	.
chr2L	15485771	15485772	.	.	.	.
chr2L	16352728	16352729	.	.	.	.
chr2L	16491595	16491596	.	.	.	.
chr2L	16677148	16677149	.	.	.	.
chr2L	16679985	16679986	.	.	.	.
chr2L	16787755	16787756	CG17927-RD	.	.	.
chr2L	17830964	17830965	.	.	.	.
chr2L	18088121	18088122	.	.	.	.
chr2L	18358209	18358210	.	.	.	.
chr2L	18768320	18768321	.	.	.	.
chr2L	18808859	18808860	.	.	.	.
chr2L	19158746	19158747	CG10719-RC	CG17348-RA	.	.
chr2L	19219908	19219909	CG17348-RA	.	.	.
chr2L	19453563	19453564	.	.	.	.
chr2L	19475274	19475275	.	.	.	.
chr2L	19758719	19758720	.	.	.	.
chr2L	20350258	20350259	.	.	.	.
chr2L	20647512	20647513	.	.	.	.
chr2L	20676058	20676059	.	.	.	.
chr3R	604711	604712	.	.	.	.
chr3R	801358	801359	.	.	.	.
chr3R	869049	869050	.	.	.	.
chr3R	2176531	2176532	.	.	.	.
chr3R	2194114	2194115	.	.	.	.
chr3R	2206011	2206012	.	.	.	.
chr3R	2490335	2490336	.	.	.	.
chr3R	2738831	2738832	.	.	.	.
chr3R	2775097	2775098	.	.	.	.
chr3R	2863501	2863502	.	.	.	.
chr3R	2912513	2912514	.	.	.	.
chr3R	2919579	2919580	.	.	.	.
chr3R	3636040	3636041	.	.	.	.
chr3R	3733160	3733161	.	.	.	.
chr3R	4016830	4016831	.	.	.	.
chr3R	4059229	4059230	.	.	.	.
chr3R	4097825	4097826	.	.	.	.
chr3R	4303226	4303227	CG45263-RA	.	.	.
chr3R	4476588	4476589	.	.	.	.
chr3R	4573436	4573437	.	.	.	.
chr3R	4865231	4865232	CG11988-RA	.	.	.
chr3R	5031956	5031957	.	.	.	.
chr3R	5044135	5044136	.	.	.	.
chr3R	5412598	5412599	.	.	.	.
chr3R	5452838	5452839	.	.	.	.
chr3R	5463373	5463374	.	.	.	.
chr3R	5626847	5626848	CG8495-RC	.	.	.
chr3R	5715239	5715240	.	.	.	.
chr3R	6321797	6321798	.	.	.	.
chr3R	6347287	6347288	.	.	.	.
chr3R	6586851	6586852	.	.	.	.
chr3R	6610087	6610088	.	.	.	.
chr3R	7788677	7788678	.	.	.	.
chr3R	7954458	7954459	CG4702-RA	.	.	.
chr3R	8293681	8293682	CG31449-RA	.	.	.
chr3R	8930173	8930174	.	.	.	.
chr3R	9119414	9119415	.	.	.	.
chr3R	9263166	9263167	CG18290-RA	FlyExpress_yellow-e3	.	.
chr3R	9389127	9389128	.	.	.	.
chr3R	9735694	9735695	.	.	.	.
chr3R	10217180	10217181	CG8524-RB	.	.	.
chr3R	10247737	10247738	.	.	.	.
chr3R	10407362	10407363	CG31317-RA	.	.	.
chr3R	10450129	10450130	CG31317-RA	.	.	.
chr3R	10451787	10451788	CG31317-RA	.	.	.
chr3R	10481362	10481363	.	.	.	.
chr3R	10505427	10505428	CG7649-RB	.	.	.
chr3R	10643813	10643814	CG33555-RG	.	.	.
chr3R	11022233	11022234	.	.	.	.
chr3R	11034813	11034814	.	.	.	.
chr3R	11106611	11106612	CG4898-RB	.	.	.
chr3R	11299393	11299394	.	.	.	.
chr3R	11875374	11875375	.	.	.	.
chr3R	12267495	12267496	.	.	.	.
chr3R	12473275	12473276	.	.	.	.
chr3R	12575983	12575984	.	.	.	.
chr3R	12724494	12724495	.	.	.	.
chr3R	12759620	12759621	.	.	.	.
chr3R	12795538	12795539	.	.	.	.
chr3R	12854171	12854172	.	.	.	.
chr3R	12878576	12878577	.	.	.	.
chr3R	12880229	12880230	.	.	.	.
chr3R	12905263	12905264	CG3937-RB	.	.	.
chr3R	12977561	12977562	.	.	.	.
chr3R	13366028	13366029	.	.	.	.
chr3R	13429563	13429564	.	.	.	.
chr3R	13631033	13631034	.	.	.	.
chr3R	14982525	14982526	.	.	.	.
chr3R	14989790	14989791	.	.	.	.
chr3R	15625123	15625124	FlyExpress_bnl	.	.	.
chr3R	15625727	15625728	FlyExpress_bnl	.	.	.
chr3R	15690295	15690296	FlyExpress_bnl	.	.	.
chr3R	16117666	16117667	.	.	.	.
chr3R	16774405	16774406	.	.	.	.
chr3R	16927858	16927859	.	.	.	.
chr3R	17199263	17199264	CG32491-RG	.	.	.
chr3R	17218822	17218823	CG32491-RG	.	.	.
chr3R	17220019	17220020	CG32491-RG	.	.	.
chr3R	17959714	17959715	.	.	.	.
chr3R	17960257	17960258	.	.	.	.
chr3R	18044716	18044717	.	.	.	.
chr3R	18516128	18516129	.	.	.	.
chr3R	18576508	18576509	.	.	.	.
chr3R	18615098	18615099	.	.	.	.
chr3R	18967708	18967709	.	.	.	.
chr3R	19203192	19203193	CG4408-RA	.	.	.
chr3R	19699748	19699749	.	.	.	.
chr3R	19757143	19757144	.	.	.	.
chr3R	19995387	19995388	.	.	.	.
chr3R	20159091	20159092	.	.	.	.
chr3R	20412362	20412363	.	.	.	.
chr3R	20639612	20639613	CG7005-RA	.	.	.
chr3R	20696320	20696321	CG7005-RA	CG11069-RA	.	.
chr3R	20804204	20804205	.	.	.	.
chr3R	21020626	21020627	CG13653-RA	CG13654-RA	CG11849-RA	CG11851-RA
chr3R	21841124	21841125	FlyExpress_e(spl)m5-HLH	CG8384-RA	.	.
chr3R	21868052	21868053	CG8384-RA	FlyExpress_e(spl)m5-HLH	.	.
chr3R	21868630	21868631	CG8384-RA	FlyExpress_e(spl)m5-HLH	.	.
chr3R	21948327	21948328	.	.	.	.
chr3R	22708397	22708398	.	.	.	.
chr3R	23064849	23064850	CG31064-RA	.	.	.
chr3R	23106971	23106972	.	.	.	.
chr3R	23669730	23669731	.	.	.	.
chr3R	23811929	23811930	.	.	.	.
chr3R	23941902	23941903	.	.	.	.
chr3R	24457704	24457705	.	.	.	.
chr3R	24817791	24817792	.	.	.	.
chr3R	24938734	24938735	.	.	.	.
chr3R	25177429	25177430	.	.	.	.
chr3R	25283116	25283117	.	.	.	.
chr3R	25871314	25871315	.	.	.	.
chr3R	26581063	26581064	.	.	.	.
chr3R	26607524	26607525	.	.	.	.
chr3R	26738374	26738375	.	.	.	.
chr3R	27073824	27073825	.	.	.	.
chr3R	27526592	27526593	CG1856-RA	.	.	.
chr2R	1664031	1664032	.	.	.	.
chr2R	2460906	2460907	.	.	.	.
chr2R	2519892	2519893	.	.	.	.
chr2R	3027419	3027420	CG12172-RA	.	.	.
chr2R	4174753	4174754	.	.	.	.
chr2R	4794834	4794835	.	.	.	.
chr2R	5466468	5466469	.	.	.	.
chr2R	6356063	6356064	.	.	.	.
chr2R	6422852	6422853	CG12052-RA	.	.	.
chr2R	6731669	6731670	CG30015-RD	.	.	.
chr2R	7872908	7872909	.	.	.	.
chr2R	8027994	8027995	.	.	.	.
chr2R	8521088	8521089	CG8632-RA	.	.	.
chr2R	8664416	8664417	CG17579-RB	.	.	.
chr2R	8844027	8844028	.	.	.	.
chr2R	8873303	8873304	.	.	.	.
chr2R	8879182	8879183	.	.	.	.
chr2R	9046051	9046052	CG4007-RA	.	.	.
chr2R	9055443	9055444	CG4007-RA	.	.	.
chr2R	9076973	9076974	CG4007-RA	.	.	.
chr2R	9359644	9359645	.	.	.	.
chr2R	9448207	9448208	CG13333-RA	CG33156-RB	.	.
chr2R	9449139	9449140	CG13333-RA	CG33156-RB	.	.
chr2R	9450928	9450929	CG13333-RA	CG33156-RB	.	.
chr2R	9451313	9451314	CG13333-RA	CG33156-RB	.	.
chr2R	9452219	9452220	CG13333-RA	CG33156-RB	.	.
chr2R	9453851	9453852	CG13333-RA	CG33156-RB	.	.
chr2R	9454414	9454415	CG13333-RA	CG33156-RB	.	.
chr2R	9455002	9455003	CG13333-RA	CG33156-RB	.	.
chr2R	9456467	9456468	CG13333-RA	CG33156-RB	.	.
chr2R	9457795	9457796	CG13333-RA	CG33156-RB	.	.
chr2R	9741907	9741908	.	.	.	.
chr2R	10061749	10061750	.	.	.	.
chr2R	10062329	10062330	.	.	.	.
chr2R	10064420	10064421	.	.	.	.
chr2R	10158140	10158141	CG8547-RB	CG34379-RD	.	.
chr2R	10299285	10299286	.	.	.	.
chr2R	10391472	10391473	CG10112-RA	.	.	.
chr2R	10506289	10506290	.	.	.	.
chr2R	10639728	10639729	.	.	.	.
chr2R	10950240	10950241	.	.	.	.
chr2R	11209738	11209739	.	.	.	.
chr2R	11778476	11778477	.	.	.	.
chr2R	11785740	11785741	.	.	.	.
chr2R	11788189	11788190	.	.	.	.
chr2R	13030736	13030737	.	.	.	.
chr2R	13553220	13553221	.	.	.	.
chr2R	13683510	13683511	.	.	.	.
chr2R	13739162	13739163	CG5779-RA	.	.	.
chr2R	14047955	14047956	.	.	.	.
chr2R	14082204	14082205	.	.	.	.
chr2R	14098482	14098483	.	.	.	.
chr2R	14164866	14164867	.	.	.	.
chr2R	14453268	14453269	.	.	.	.
chr2R	14690275	14690276	FlyExpress_l(2)08717	FlyExpress_CG15094	CG15098-RA	.
chr2R	14734252	14734253	CG15098-RA	.	.	.
chr2R	14844604	14844605	.	.	.	.
chr2R	14947727	14947728	.	.	.	.
chr2R	15150183	15150184	CG7225-RA	CG11949-RA	.	.
chr2R	15518675	15518676	.	.	.	.
chr2R	15728374	15728375	CG8595-RA	.	.	.
chr2R	15994011	15994012	.	.	.	.
chr2R	16087639	16087640	.	.	.	.
chr2R	16490535	16490536	CG13425-RB	.	.	.
chr2R	16554970	16554971	.	.	.	.
chr2R	16555533	16555534	.	.	.	.
chr2R	16794951	16794952	CG10067-RA	.	.	.
chr2R	17368434	17368435	.	.	.	.
chr2R	17432976	17432977	CG10079-RB	.	.	.
chr2R	17433575	17433576	CG10079-RB	.	.	.
chr2R	17534148	17534149	CG10082-RB	CG42365-RA	.	.
chr2R	17578722	17578723	CG42365-RA	CG10082-RB	.	.
chr2R	18136246	18136247	.	.	.	.
chr2R	18576624	18576625	.	.	.	.
chr2R	18577388	18577389	.	.	.	.
chr2R	18690536	18690537	.	.	.	.
chr2R	18937305	18937306	.	.	.	.
chr2R	19105678	19105679	.	.	.	.
chr2R	19435556	19435557	.	.	.	.
chr2R	19866414	19866415	.	.	.	.
chr2R	19916423	19916424	.	.	.	.
chr2R	20585482	20585483	CG34214-RA	.	.	.
chr2R	20893720	20893721	.	.	.	.
chrX	413505	413506	.	.	.	.
chrX	484897	484898	.	.	.	.
chrX	510700	510701	.	.	.	.
chrX	981094	981095	.	.	.	.
chrX	1104078	1104079	.	.	.	.
chrX	1378278	1378279	.	.	.	.
chrX	1378784	1378785	.	.	.	.
chrX	1538304	1538305	.	.	.	.
chrX	1548972	1548973	.	.	.	.
chrX	1550627	1550628	.	.	.	.
chrX	1551815	1551816	.	.	.	.
chrX	1802230	1802231	.	.	.	.
chrX	2019750	2019751	CG18412-RA	.	.	.
chrX	2059839	2059840	CG18412-RA	.	.	.
chrX	2074954	2074955	.	.	.	.
chrX	2302818	2302819	.	.	.	.
chrX	2338006	2338007	.	.	.	.
chrX	3082003	3082004	.	.	.	.
chrX	3376808	3376809	.	.	.	.
chrX	3613940	3613941	.	.	.	.
chrX	3635007	3635008	.	.	.	.
chrX	3667163	3667164	CG2947-RB	.	.	.
chrX	4091362	4091363	.	.	.	.
chrX	4105354	4105355	.	.	.	.
chrX	4131823	4131824	.	.	.	.
chrX	4285092	4285093	.	.	.	.
chrX	4834546	4834547	CG44774-RA	.	.	.
chrX	5069200	5069201	.	.	.	.
chrX	5223552	5223553	CG4193-RA	.	.	.
chrX	5448283	5448284	.	.	.	.
chrX	5687687	5687688	CG3108-RA	.	.	.
chrX	5691871	5691872	CG3108-RA	.	.	.
chrX	5695132	5695133	CG3108-RA	.	.	.
chrX	5792861	5792862	.	.	.	.
chrX	5794691	5794692	.	.	.	.
chrX	5890843	5890844	.	.	.	.
chrX	6634179	6634180	.	.	.	.
chrX	6697722	6697723	.	.	.	.
chrX	6698240	6698241	.	.	.	.
chrX	6749997	6749998	.	.	.	.
chrX	7070076	7070077	.	.	.	.
chrX	7497958	7497959	CG11387-RA	.	.	.
chrX	7502099	7502100	CG11387-RA	.	.	.
chrX	7877427	7877428	.	.	.	.
chrX	7955508	7955509	CG2252-RC	.	.	.
chrX	8036288	8036289	.	.	.	.
chrX	8262732	8262733	.	.	.	.
chrX	8318666	8318667	.	.	.	.
chrX	8526607	8526608	.	.	.	.
chrX	8614434	8614435	.	.	.	.
chrX	8724058	8724059	.	.	.	.
chrX	8838071	8838072	.	.	.	.
chrX	9374014	9374015	.	.	.	.
chrX	9444788	9444789	.	.	.	.
chrX	9578725	9578726	CG12653-RA	CG32697-RA	.	.
chrX	9579800	9579801	CG12653-RA	CG32697-RA	.	.
chrX	9638116	9638117	.	.	.	.
chrX	9685398	9685399	.	.	.	.
chrX	10367140	10367141	.	.	.	.
chrX	10639090	10639091	.	.	.	.
chrX	10696242	10696243	CG1691-RF	.	.	.
chrX	11458081	11458082	.	.	.	.
chrX	11610745	11610746	.	.	.	.
chrX	11728859	11728860	.	.	.	.
chrX	12309727	12309728	.	.	.	.
chrX	12526345	12526346	CG2028-RC	.	.	.
chrX	12528112	12528113	CG2028-RC	.	.	.
chrX	12832367	12832368	CG4396-RA	CG4404-RA	.	.
chrX	13190962	13190963	FlyExpress_mew	.	.	.
chrX	13703043	13703044	.	.	.	.
chrX	13713564	13713565	.	.	.	.
chrX	14374203	14374204	.	.	.	.
chrX	14432703	14432704	.	.	.	.
chrX	14859988	14859989	.	.	.	.
chrX	15213463	15213464	.	.	.	.
chrX	15468634	15468635	.	.	.	.
chrX	15606607	15606608	.	.	.	.
chrX	15628177	15628178	.	.	.	.
chrX	15988240	15988241	.	.	.	.
chrX	16056046	16056047	.	.	.	.
chrX	16135998	16135999	.	.	.	.
chrX	16214680	16214681	.	.	.	.
chrX	16393563	16393564	.	.	.	.
chrX	16492925	16492926	.	.	.	.
chrX	16669520	16669521	CG9623-RB	.	.	.
chrX	17227038	17227039	.	.	.	.
chrX	17380042	17380043	.	.	.	.
chrX	17645353	17645354	CG42684-RD	.	.	.
chrX	17877197	17877198	.	.	.	.
chrX	18165126	18165127	.	.	.	.
chrX	18193364	18193365	.	.	.	.
chrX	18264886	18264887	.	.	.	.
chrX	18535718	18535719	.	.	.	.
chrX	19659429	19659430	.	.	.	.
chrX	20122348	20122349	.	.	.	.
chrX	20265390	20265391	.	.	.	.
chrX	21075266	21075267	.	.	.	.
chrX	21239637	21239638	.	.	.	.
chrX	21317798	21317799	.	.	.	.
chrX	21857508	21857509	.	.	.	.
chrX	21863178	21863179	.	.	.	.

## Sheet: 40kb_Peak_to_Gene
#feature.id	chr_1	start_1	end_1	dist_closest_1	chr_2	start_2	end_2	dist_closest_2	chr_3	start_3	end_3	dist_closest_3	chr_4	start_4	end_4	dist_closest_4
CG8827-RA	chr2L	13905227	13905228	417	.	.	.	.	.	.	.	.	.	.	.	.
CG33466-RA	.	.	.	.	.	.	.	.	.	.	.	.	.	.	.	.
CG16869-RA	chr2L	13905227	13905228	4412	.	.	.	.	.	.	.	.	.	.	.	.
CG3218-RA	.	.	.	.	.	.	.	.	.	.	.	.	.	.	.	.
CG8649-RD	.	.	.	.	.	.	.	.	.	.	.	.	.	.	.	.
CG1944-RA	.	.	.	.	.	.	.	.	.	.	.	.	.	.	.	.
CG1048-RA	chr3R	2580238	2580239	10375	chr3R	2588944	2588945	19081	chr3R	2549554	2549555	19299	.	.	.	.
CG13653-RA	chr3R	21021124	21021125	157	chr3R	21020626	21020627	655	.	.	.	.	.	.	.	.
CG5055-RB	chrX	17071987	17071988	8986	.	.	.	.	.	.	.	.	.	.	.	.
CG12283-RA	.	.	.	.	.	.	.	.	.	.	.	.	.	.	.	.
CG7997-RB	.	.	.	.	.	.	.	.	.	.	.	.	.	.	.	.
CG8095-RB	.	.	.	.	.	.	.	.	.	.	.	.	.	.	.	.
CG2762-RA	chr2L	523080	523081	386	chr2L	518626	518627	4840	.	.	.	.	.	.	.	.
CG18088-RA	chr2L	8997547	8997548	27282	.	.	.	.	.	.	.	.	.	.	.	.
CG5187-RA	chr3L	9012699	9012700	358	chr3L	9013891	9013892	1550	chr3L	9010275	9010276	0	chr3L	8998185	8998186	7599
CG9520-RA	.	.	.	.	.	.	.	.	.	.	.	.	.	.	.	.
CG12011-RA	chr3L	1731131	1731132	34710	.	.	.	.	.	.	.	.	.	.	.	.
CG13800-RA	chr3L	2385879	2385880	2512	.	.	.	.	.	.	.	.	.	.	.	.
CG10619-RB	chr2L	18875263	18875264	0	chr2L	18890339	18890340	9089	chr2L	18895473	18895474	14223	.	.	.	.
CG31902-RB	.	.	.	.	.	.	.	.	.	.	.	.	.	.	.	.
CG12919-RA	chr2R	5965706	5965707	163	chr2R	5964776	5964777	1093	chr2R	5945423	5945424	20446	chr2R	5943941	5943942	21928
CG5399-RA	chr3R	11494862	11494863	26129	.	.	.	.	.	.	.	.	.	.	.	.
CG8084-RA	chr2R	4958868	4958869	0	chr2R	4959563	4959564	0	.	.	.	.	.	.	.	.
CG11893-RA	.	.	.	.	.	.	.	.	.	.	.	.	.	.	.	.
CG45263-RA	chr3R	4303226	4303227	0	chr3R	4293619	4293620	0	.	.	.	.	.	.	.	.
CG13912-RA	.	.	.	.	.	.	.	.	.	.	.	.	.	.	.	.
CG33956-RD	chr3R	25590063	25590064	2433	chr3R	25596904	25596905	0	.	.	.	.	.	.	.	.
CG6394-RA	.	.	.	.	.	.	.	.	.	.	.	.	.	.	.	.
CG9446-RB	.	.	.	.	.	.	.	.	.	.	.	.	.	.	.	.
CG1046-RA	chr3R	2580238	2580239	316	chr3R	2588944	2588945	9022	chr3R	2549554	2549555	29031	.	.	.	.
CG17574-RD	.	.	.	.	.	.	.	.	.	.	.	.	.	.	.	.
CG2947-RB	chrX	3673905	3673906	10164	chrX	3671474	3671475	12595	chrX	3667163	3667164	16906	.	.	.	.
CG15236-RB	.	.	.	.	.	.	.	.	.	.	.	.	.	.	.	.
CG7530-RC	.	.	.	.	.	.	.	.	.	.	.	.	.	.	.	.
CG42666-RC	chrX	1718048	1718049	18612	.	.	.	.	.	.	.	.	.	.	.	.
CG7005-RA	chr3R	20692751	20692752	16611	chr3R	20696320	20696321	20180	chr3R	20639612	20639613	33123	.	.	.	.
CG4193-RA	chrX	5223552	5223553	16396	.	.	.	.	.	.	.	.	.	.	.	.
CG34373-RG	chr3L	8068112	8068113	2379	chr3L	8072913	8072914	0	chr3L	8100462	8100463	0	chr3L	8109198	8109199	7259
CG16778-RC	chr2R	20995332	20995333	9592	.	.	.	.	.	.	.	.	.	.	.	.
CG3940-RA	chr3R	5960211	5960212	15068	.	.	.	.	.	.	.	.	.	.	.	.
CG15671-RA	chr2R	17255140	17255141	0	chr2R	17252224	17252225	0	chr2R	17251583	17251584	0	chr2R	17250948	17250949	0
CG43332-RA	.	.	.	.	.	.	.	.	.	.	.	.	.	.	.	.
CG6234-RA	chr3R	8472086	8472087	1695	chr3R	8471765	8471766	2016	chr3R	8471139	8471140	2642	.	.	.	.
CG7590-RA	chr3L	11230167	11230168	15241	.	.	.	.	.	.	.	.	.	.	.	.
CG12212-RA	chrX	4484161	4484162	27440	.	.	.	.	.	.	.	.	.	.	.	.
CG31449-RA	chr3R	8293681	8293682	180	.	.	.	.	.	.	.	.	.	.	.	.
CG5133-RA	chr3L	9034632	9034633	0	chr3L	9034243	9034244	233	chr3L	9033834	9033835	642	chr3L	9035479	9035480	0
CG5661-RA	.	.	.	.	.	.	.	.	.	.	.	.	.	.	.	.
CG42365-RA	chr2R	17536634	17536635	17617	chr2R	17534148	17534149	20103	chr2R	17578722	17578723	23622	.	.	.	.
CG31641-RC	chr2L	6088479	6088480	11898	chr2L	6079096	6079097	21281	chr2L	6133520	6133521	9614	chr2L	6134089	6134090	10183
CG30463-RC	.	.	.	.	.	.	.	.	.	.	.	.	.	.	.	.
CG8974-RA	chrX	15705985	15705986	15905	.	.	.	.	.	.	.	.	.	.	.	.
CG5442-RA	chr2L	12436393	12436394	1733	chr2L	12461144	12461145	26484	.	.	.	.	.	.	.	.
CG5093-RA	chr3L	8998185	8998186	112	chr3L	8996581	8996582	1716	chr3L	9010275	9010276	9923	chr3L	9012699	9012700	12347
CG17524-RA	.	.	.	.	.	.	.	.	.	.	.	.	.	.	.	.
CG31462-RA	.	.	.	.	.	.	.	.	.	.	.	.	.	.	.	.
CG2674-RG	chr2L	91988	91989	17619	chr2L	91520	91521	18087	chr2L	89353	89354	20254	.	.	.	.
CG44774-RA	chrX	4834546	4834547	10666	.	.	.	.	.	.	.	.	.	.	.	.
CG13654-RA	chr3R	21021124	21021125	4415	chr3R	21020626	21020627	4913	.	.	.	.	.	.	.	.
CG3206-RA	.	.	.	.	.	.	.	.	.	.	.	.	.	.	.	.
CG15162-RA	.	.	.	.	.	.	.	.	.	.	.	.	.	.	.	.
CG33300-RA	.	.	.	.	.	.	.	.	.	.	.	.	.	.	.	.
CG5014-RC	.	.	.	.	.	.	.	.	.	.	.	.	.	.	.	.
CG6753-RA	chr3R	8471139	8471140	2843	chr3R	8471765	8471766	3469	chr3R	8472086	8472087	3790	.	.	.	.
CG1916-RA	chr2R	5378382	5378383	3291	.	.	.	.	.	.	.	.	.	.	.	.
CG4421-RA	.	.	.	.	.	.	.	.	.	.	.	.	.	.	.	.
CG8448-RC	.	.	.	.	.	.	.	.	.	.	.	.	.	.	.	.
CG7995-RD	chr3L	1731131	1731132	8030	.	.	.	.	.	.	.	.	.	.	.	.
CG11164-RA	chrX	13564833	13564834	1513	.	.	.	.	.	.	.	.	.	.	.	.
CG31760-RA	.	.	.	.	.	.	.	.	.	.	.	.	.	.	.	.
CG10082-RB	chr2R	17536634	17536635	4509	chr2R	17534148	17534149	6995	chr2R	17578722	17578723	33782	.	.	.	.
CG3664-RF	.	.	.	.	.	.	.	.	.	.	.	.	.	.	.	.
CG2269-RC	chr2R	5965706	5965707	9369	chr2R	5964776	5964777	10299	chr2R	5945423	5945424	29652	chr2R	5943941	5943942	31134
CG10626-RA	.	.	.	.	.	.	.	.	.	.	.	.	.	.	.	.
CG4408-RA	chr3R	19203192	19203193	13432	chr3R	19172142	19172143	15468	chr3R	19169578	19169579	18032	chr3R	19169169	19169170	18441
CG9339-RE	.	.	.	.	.	.	.	.	.	.	.	.	.	.	.	.
CG42329-RA	.	.	.	.	.	.	.	.	.	.	.	.	.	.	.	.
CG9734-RC	.	.	.	.	.	.	.	.	.	.	.	.	.	.	.	.
CG7272-RA	.	.	.	.	.	.	.	.	.	.	.	.	.	.	.	.
CG31064-RA	chr3R	23064849	23064850	49	.	.	.	.	.	.	.	.	.	.	.	.
CG10360-RB	chr2L	19575963	19575964	30423	chr2L	19576985	19576986	31445	.	.	.	.	.	.	.	.
CG15817-RA	.	.	.	.	.	.	.	.	.	.	.	.	.	.	.	.
CG3798-RA	.	.	.	.	.	.	.	.	.	.	.	.	.	.	.	.
CG32021-RA	.	.	.	.	.	.	.	.	.	.	.	.	.	.	.	.
CG1389-RA	.	.	.	.	.	.	.	.	.	.	.	.	.	.	.	.
CG8849-RA	.	.	.	.	.	.	.	.	.	.	.	.	.	.	.	.
CG30382-RA	.	.	.	.	.	.	.	.	.	.	.	.	.	.	.	.
CG14545-RA	.	.	.	.	.	.	.	.	.	.	.	.	.	.	.	.
CG33156-RB	chr2R	9448207	9448208	10426	chr2R	9449139	9449140	11358	chr2R	9450928	9450929	13147	chr2R	9451313	9451314	13532
CG5272-RA	.	.	.	.	.	.	.	.	.	.	.	.	.	.	.	.
CG3752-RA	.	.	.	.	.	.	.	.	.	.	.	.	.	.	.	.
CG9674-RD	.	.	.	.	.	.	.	.	.	.	.	.	.	.	.	.
CG13610-RA	chr3R	20098396	20098397	356	.	.	.	.	.	.	.	.	.	.	.	.
CG5099-RB	chr3R	21325796	21325797	18248	.	.	.	.	.	.	.	.	.	.	.	.
CG8632-RA	chr2R	8521088	8521089	19223	.	.	.	.	.	.	.	.	.	.	.	.
CG7937-RA	.	.	.	.	.	.	.	.	.	.	.	.	.	.	.	.
CG8524-RB	chr3R	10217180	10217181	24170	.	.	.	.	.	.	.	.	.	.	.	.
CG3429-RA	.	.	.	.	.	.	.	.	.	.	.	.	.	.	.	.
CG32581-RB	chrX	15705985	15705986	12795	.	.	.	.	.	.	.	.	.	.	.	.
CG4302-RA	chr2R	17138292	17138293	35822	chr2R	17138739	17138740	36269	.	.	.	.	.	.	.	.
CG8385-RH	chr3L	22856967	22856968	4511	.	.	.	.	.	.	.	.	.	.	.	.
CG15658-RA	.	.	.	.	.	.	.	.	.	.	.	.	.	.	.	.
CG10184-RA	.	.	.	.	.	.	.	.	.	.	.	.	.	.	.	.
CG32697-RA	chrX	9578725	9578726	33934	chrX	9579800	9579801	35009	chrX	9580547	9580548	35756	.	.	.	.
CG6721-RA	chr3L	9848010	9848011	0	chr3L	9849000	9849001	620	.	.	.	.	.	.	.	.
CG10072-RA	.	.	.	.	.	.	.	.	.	.	.	.	.	.	.	.
CG4404-RA	chrX	12832367	12832368	32307	.	.	.	.	.	.	.	.	.	.	.	.
CG7660-RB	.	.	.	.	.	.	.	.	.	.	.	.	.	.	.	.
CG10236-RA	chr3L	6182216	6182217	14714	chr3L	6178025	6178026	18905	.	.	.	.	.	.	.	.
CG5888-RA	.	.	.	.	.	.	.	.	.	.	.	.	.	.	.	.
CG16983-RF	chrX	580814	580815	28876	chrX	511694	511695	39016	.	.	.	.	.	.	.	.
CG5481-RA	chr2L	1420247	1420248	0	.	.	.	.	.	.	.	.	.	.	.	.
CG32434-RC	chr3L	21060642	21060643	345	.	.	.	.	.	.	.	.	.	.	.	.
CG2125-RA	.	.	.	.	.	.	.	.	.	.	.	.	.	.	.	.
CG17941-RA	.	.	.	.	.	.	.	.	.	.	.	.	.	.	.	.
CG8495-RC	chr3R	5626847	5626848	22046	.	.	.	.	.	.	.	.	.	.	.	.
CG34214-RA	chr2R	20585482	20585483	31942	.	.	.	.	.	.	.	.	.	.	.	.
CG12369-RB	.	.	.	.	.	.	.	.	.	.	.	.	.	.	.	.
CG9075-RB	.	.	.	.	.	.	.	.	.	.	.	.	.	.	.	.
CG3938-RB	chr2L	15732174	15732175	394	.	.	.	.	.	.	.	.	.	.	.	.
CG12028-RA	.	.	.	.	.	.	.	.	.	.	.	.	.	.	.	.
CG11849-RA	chr3R	21020626	21020627	2106	chr3R	21021124	21021125	2604	.	.	.	.	.	.	.	.
CG17348-RA	chr2L	19161472	19161473	28873	chr2L	19219908	19219909	11298	chr2L	19158746	19158747	31599	chr2L	19156369	19156370	33976
CG18412-RA	chrX	2019750	2019751	486	chrX	2018210	2018211	2026	chrX	2059839	2059840	29260	.	.	.	.
CG7649-RB	chr3R	10505427	10505428	0	.	.	.	.	.	.	.	.	.	.	.	.
CG13333-RA	chr2R	9448207	9448208	3359	chr2R	9449139	9449140	4291	chr2R	9450928	9450929	6080	chr2R	9451313	9451314	6465
CG3423-RA	chr2L	6967710	6967711	13119	chr2L	6968000	6968001	13409	.	.	.	.	.	.	.	.
CG14025-RC	chr2L	5306627	5306628	29288	chr2L	5239877	5239878	31846	.	.	.	.	.	.	.	.
CG15010-RA	chr3L	4252359	4252360	239	chr3L	4253025	4253026	905	chr3L	4230537	4230538	15788	.	.	.	.
CG3048-RA	.	.	.	.	.	.	.	.	.	.	.	.	.	.	.	.
CG34137-RA	.	.	.	.	.	.	.	.	.	.	.	.	.	.	.	.
CG3166-RB	chr2L	2164877	2164878	0	.	.	.	.	.	.	.	.	.	.	.	.
CG1691-RF	chrX	10716877	10716878	67	chrX	10696242	10696243	0	.	.	.	.	.	.	.	.
CG15288-RB	chr2L	14261982	14261983	1539	.	.	.	.	.	.	.	.	.	.	.	.
CG33232-RC	.	.	.	.	.	.	.	.	.	.	.	.	.	.	.	.
CG6868-RA	.	.	.	.	.	.	.	.	.	.	.	.	.	.	.	.
CG4922-RA	chr2L	11450691	11450692	35497	chr2L	11447798	11447799	38390	.	.	.	.	.	.	.	.
CG3779-RA	chr2L	9449326	9449327	503	.	.	.	.	.	.	.	.	.	.	.	.
CG31531-RB	.	.	.	.	.	.	.	.	.	.	.	.	.	.	.	.
CG7271-RA	.	.	.	.	.	.	.	.	.	.	.	.	.	.	.	.
CG34383-RC	chr3R	9510687	9510688	30257	.	.	.	.	.	.	.	.	.	.	.	.
CG9775-RC	.	.	.	.	.	.	.	.	.	.	.	.	.	.	.	.
CG3322-RA	.	.	.	.	.	.	.	.	.	.	.	.	.	.	.	.
CG31607-RA	.	.	.	.	.	.	.	.	.	.	.	.	.	.	.	.
CG18255-RD	.	.	.	.	.	.	.	.	.	.	.	.	.	.	.	.
CG10293-RC	.	.	.	.	.	.	.	.	.	.	.	.	.	.	.	.
CG10079-RB	chr2R	17433575	17433576	1498	chr2R	17432976	17432977	2097	chr2R	17411491	17411492	23582	.	.	.	.
CG12082-RA	.	.	.	.	.	.	.	.	.	.	.	.	.	.	.	.
CG4216-RA	.	.	.	.	.	.	.	.	.	.	.	.	.	.	.	.
CG11851-RA	chr3R	21021124	21021125	26190	chr3R	21020626	21020627	26688	.	.	.	.	.	.	.	.
CG18111-RA	.	.	.	.	.	.	.	.	.	.	.	.	.	.	.	.
CG42278-RC	.	.	.	.	.	.	.	.	.	.	.	.	.	.	.	.
CG2252-RC	chrX	7955508	7955509	38	.	.	.	.	.	.	.	.	.	.	.	.
CG31317-RA	chr3R	10407362	10407363	10822	chr3R	10450129	10450130	16329	chr3R	10451787	10451788	17987	.	.	.	.
CG11988-RA	chr3R	4856038	4856039	0	chr3R	4865231	4865232	5781	.	.	.	.	.	.	.	.
CG8434-RA	chr2R	12047621	12047622	4230	chr2R	12038295	12038296	13556	.	.	.	.	.	.	.	.
CG7540-RA	chr3L	21472802	21472803	28149	chr3L	21469834	21469835	31117	.	.	.	.	.	.	.	.
CG14080-RB	.	.	.	.	.	.	.	.	.	.	.	.	.	.	.	.
CG3424-RA	.	.	.	.	.	.	.	.	.	.	.	.	.	.	.	.
CG33196-RC	chr2L	4597833	4597834	5869	.	.	.	.	.	.	.	.	.	.	.	.
CG14985-RB	.	.	.	.	.	.	.	.	.	.	.	.	.	.	.	.
CG30023-RA	.	.	.	.	.	.	.	.	.	.	.	.	.	.	.	.
CG13651-RA	.	.	.	.	.	.	.	.	.	.	.	.	.	.	.	.
CG3502-RB	.	.	.	.	.	.	.	.	.	.	.	.	.	.	.	.
CG32227-RA	.	.	.	.	.	.	.	.	.	.	.	.	.	.	.	.
CG7250-RA	chr3L	15323700	15323701	6099	.	.	.	.	.	.	.	.	.	.	.	.
CG8654-RA	.	.	.	.	.	.	.	.	.	.	.	.	.	.	.	.
CG30015-RD	chr2R	6731669	6731670	140	.	.	.	.	.	.	.	.	.	.	.	.
CG33868-RA	.	.	.	.	.	.	.	.	.	.	.	.	.	.	.	.
CG13425-RB	chr2R	16490535	16490536	0	.	.	.	.	.	.	.	.	.	.	.	.
CG8384-RA	chr3R	21868052	21868053	0	chr3R	21868630	21868631	0	chr3R	21856502	21856503	11349	chr3R	21841124	21841125	26727
CG11949-RA	chr2R	15150183	15150184	18923	.	.	.	.	.	.	.	.	.	.	.	.
CG14938-RD	chr2L	11807159	11807160	0	.	.	.	.	.	.	.	.	.	.	.	.
CG3937-RB	chr3R	12906836	12906837	10420	chr3R	12905263	12905264	11993	chr3R	12893645	12893646	23611	chr3R	12887711	12887712	29545
CG32062-RG	.	.	.	.	.	.	.	.	.	.	.	.	.	.	.	.
CG6885-RA	.	.	.	.	.	.	.	.	.	.	.	.	.	.	.	.
CG9623-RB	chrX	16669520	16669521	0	.	.	.	.	.	.	.	.	.	.	.	.
CG4702-RA	chr3R	7954458	7954459	538	.	.	.	.	.	.	.	.	.	.	.	.
CG17579-RB	chr2R	8664416	8664417	3632	.	.	.	.	.	.	.	.	.	.	.	.
CG17894-RB	.	.	.	.	.	.	.	.	.	.	.	.	.	.	.	.
CG2028-RC	chrX	12548561	12548562	211	chrX	12557719	12557720	6419	chrX	12528112	12528113	20660	chrX	12526345	12526346	22427
CG9326-RC	chr2L	20783315	20783316	5343	chr2L	20770527	20770528	18131	chr2L	20822813	20822814	28553	.	.	.	.
CG17117-RE	chr3R	6469293	6469294	4906	chr3R	6442739	6442740	0	.	.	.	.	.	.	.	.
CG17510-RA	.	.	.	.	.	.	.	.	.	.	.	.	.	.	.	.
CG8595-RA	chr2R	15728374	15728375	9624	.	.	.	.	.	.	.	.	.	.	.	.
CG31721-RA	.	.	.	.	.	.	.	.	.	.	.	.	.	.	.	.
CG1374-RA	.	.	.	.	.	.	.	.	.	.	.	.	.	.	.	.
CG12908-RA	.	.	.	.	.	.	.	.	.	.	.	.	.	.	.	.
CG1915-RC	.	.	.	.	.	.	.	.	.	.	.	.	.	.	.	.
CG2986-RE	chr2L	2885149	2885150	28443	.	.	.	.	.	.	.	.	.	.	.	.
CG17131-RB	.	.	.	.	.	.	.	.	.	.	.	.	.	.	.	.
CG10112-RA	chr2R	10391472	10391473	8574	.	.	.	.	.	.	.	.	.	.	.	.
CG5080-RB	.	.	.	.	.	.	.	.	.	.	.	.	.	.	.	.
CG10287-RA	.	.	.	.	.	.	.	.	.	.	.	.	.	.	.	.
CG7884-RA	.	.	.	.	.	.	.	.	.	.	.	.	.	.	.	.
CG3851-RA	.	.	.	.	.	.	.	.	.	.	.	.	.	.	.	.
CG30080-RA	chr2R	11563951	11563952	22272	chr2R	11563323	11563324	22900	.	.	.	.	.	.	.	.
CG3625-RB	chr2L	249243	249244	34141	.	.	.	.	.	.	.	.	.	.	.	.
CG1897-RA	chr3R	25373766	25373767	8342	chr3R	25409361	25409362	18361	.	.	.	.	.	.	.	.
CG3388-RA	chr2R	20944710	20944711	4792	.	.	.	.	.	.	.	.	.	.	.	.
CG32019-RE	chr4	717483	717484	27574	.	.	.	.	.	.	.	.	.	.	.	.
CG5899-RB	.	.	.	.	.	.	.	.	.	.	.	.	.	.	.	.
CG12052-RA	chr2R	6422852	6422853	317	chr2R	6446420	6446421	23885	.	.	.	.	.	.	.	.
CG10521-RA	chrX	14643192	14643193	0	chrX	14642747	14642748	0	.	.	.	.	.	.	.	.
CG10067-RA	chr2R	16801662	16801663	29870	chr2R	16794951	16794952	36581	.	.	.	.	.	.	.	.
CG5779-RA	chr2R	13739162	13739163	35555	.	.	.	.	.	.	.	.	.	.	.	.
CG31020-RA	.	.	.	.	.	.	.	.	.	.	.	.	.	.	.	.
CG11527-RA	.	.	.	.	.	.	.	.	.	.	.	.	.	.	.	.
CG12653-RA	chrX	9580547	9580548	7673	chrX	9579800	9579801	8420	chrX	9578725	9578726	9495	.	.	.	.
CG8799-RA	.	.	.	.	.	.	.	.	.	.	.	.	.	.	.	.
CG34379-RD	chr2R	10158140	10158141	37526	.	.	.	.	.	.	.	.	.	.	.	.
CG1056-RB	.	.	.	.	.	.	.	.	.	.	.	.	.	.	.	.
CG12443-RA	.	.	.	.	.	.	.	.	.	.	.	.	.	.	.	.
CG31666-RD	.	.	.	.	.	.	.	.	.	.	.	.	.	.	.	.
CG2264-RB	chr2R	5943941	5943942	394	chr2R	5945423	5945424	0	chr2R	5943172	5943173	1163	chr2R	5964776	5964777	13557
CG12296-RA	chr3L	11003521	11003522	1601	.	.	.	.	.	.	.	.	.	.	.	.
CG1934-RA	.	.	.	.	.	.	.	.	.	.	.	.	.	.	.	.
CG4158-RA	.	.	.	.	.	.	.	.	.	.	.	.	.	.	.	.
CG11069-RA	chr3R	20696320	20696321	24145	chr3R	20692751	20692752	27714	.	.	.	.	.	.	.	.
CG4898-RB	chr3R	11106611	11106612	642	.	.	.	.	.	.	.	.	.	.	.	.
CG18024-RA	chr2L	8825446	8825447	178	chr2L	8832489	8832490	2818	chr2L	8841513	8841514	11842	chr2L	8842031	8842032	12360
CG17046-RC	.	.	.	.	.	.	.	.	.	.	.	.	.	.	.	.
CG9689-RA	.	.	.	.	.	.	.	.	.	.	.	.	.	.	.	.
CG33103-RC	.	.	.	.	.	.	.	.	.	.	.	.	.	.	.	.
CG3401-RA	.	.	.	.	.	.	.	.	.	.	.	.	.	.	.	.
CG1244-RB	.	.	.	.	.	.	.	.	.	.	.	.	.	.	.	.
CG12063-RA	.	.	.	.	.	.	.	.	.	.	.	.	.	.	.	.
CG9628-RB	chr3L	14625246	14625247	3976	chr3L	14625532	14625533	4262	.	.	.	.	.	.	.	.
CG10717-RA	chr3L	13371495	13371496	4371	.	.	.	.	.	.	.	.	.	.	.	.
CG31045-RF	chr3R	11924492	11924493	5222	chr3R	11925615	11925616	6345	chr3R	11897775	11897776	0	.	.	.	.
CG9653-RA	chrX	7201745	7201746	228	chrX	7200186	7200187	1787	chrX	7195399	7195400	6574	chrX	7193930	7193931	8043
CG10325-RA	chr3R	12637612	12637613	0	chr3R	12674546	12674547	18776	.	.	.	.	.	.	.	.
CG9073-RA	.	.	.	.	.	.	.	.	.	.	.	.	.	.	.	.
CG33555-RG	chr3R	10645567	10645568	0	chr3R	10643813	10643814	0	chr3R	10679871	10679872	26441	.	.	.	.
CG4844-RA	.	.	.	.	.	.	.	.	.	.	.	.	.	.	.	.
CG10037-RA	chr3L	6760307	6760308	22952	chr3L	6757987	6757988	25272	chr3L	6814430	6814431	26792	.	.	.	.
CG6634-RA	chr2L	5461641	5461642	0	chr2L	5461323	5461324	317	chr2L	5458760	5458761	2880	.	.	.	.
CG3254-RA	.	.	.	.	.	.	.	.	.	.	.	.	.	.	.	.
CG2184-RB	.	.	.	.	.	.	.	.	.	.	.	.	.	.	.	.
CG4007-RA	chr2R	9046051	9046052	1191	chr2R	9055443	9055444	5108	chr2R	9076973	9076974	26638	.	.	.	.
CG9224-RA	.	.	.	.	.	.	.	.	.	.	.	.	.	.	.	.
CG33183-RA	.	.	.	.	.	.	.	.	.	.	.	.	.	.	.	.
CG10719-RC	chr2L	19161472	19161473	6094	chr2L	19158746	19158747	8820	chr2L	19156369	19156370	11197	chr2L	19137009	19137010	30557
CG2049-RG	chr2R	5180166	5180167	23697	.	.	.	.	.	.	.	.	.	.	.	.
CG11895-RA	.	.	.	.	.	.	.	.	.	.	.	.	.	.	.	.
CG7178-RA	.	.	.	.	.	.	.	.	.	.	.	.	.	.	.	.
CG2330-RA	.	.	.	.	.	.	.	.	.	.	.	.	.	.	.	.
CG1856-RA	chr3R	27526592	27526593	24594	.	.	.	.	.	.	.	.	.	.	.	.
CG11387-RA	chrX	7502099	7502100	1081	chrX	7497958	7497959	5222	.	.	.	.	.	.	.	.
CG18290-RA	chr3R	9263166	9263167	9354	.	.	.	.	.	.	.	.	.	.	.	.
CG14351-RA	chr2L	1518058	1518059	37100	.	.	.	.	.	.	.	.	.	.	.	.
CG15098-RA	chr2R	14734252	14734253	11982	chr2R	14690275	14690276	30601	.	.	.	.	.	.	.	.
CG9491-RC	chr2L	6323901	6323902	0	.	.	.	.	.	.	.	.	.	.	.	.
CG13194-RB	chr2R	7604164	7604165	0	.	.	.	.	.	.	.	.	.	.	.	.
CG3108-RA	chrX	5687687	5687688	12037	chrX	5691871	5691872	16221	chrX	5695132	5695133	19482	chrX	5641219	5641220	30008
CG12311-RA	.	.	.	.	.	.	.	.	.	.	.	.	.	.	.	.
CG13920-RA	.	.	.	.	.	.	.	.	.	.	.	.	.	.	.	.
CG17228-RF	chr3R	7198188	7198189	0	chr3R	7198573	7198574	0	chr3R	7204381	7204382	0	chr3R	7179365	7179366	18343
CG4396-RA	chrX	12832367	12832368	233	.	.	.	.	.	.	.	.	.	.	.	.
CG31300-RA	.	.	.	.	.	.	.	.	.	.	.	.	.	.	.	.
CG1151-RA	.	.	.	.	.	.	.	.	.	.	.	.	.	.	.	.
CG7756-RA	chr3R	8837918	8837919	32562	.	.	.	.	.	.	.	.	.	.	.	.
CG5191-RC	chr3R	16369035	16369036	22326	.	.	.	.	.	.	.	.	.	.	.	.
CG1153-RA	.	.	.	.	.	.	.	.	.	.	.	.	.	.	.	.
CG17420-RD	.	.	.	.	.	.	.	.	.	.	.	.	.	.	.	.
CG7675-RA	.	.	.	.	.	.	.	.	.	.	.	.	.	.	.	.
CG8193-RA	chr2R	4958868	4958869	26654	chr2R	4959563	4959564	27349	.	.	.	.	.	.	.	.
CG1130-RA	.	.	.	.	.	.	.	.	.	.	.	.	.	.	.	.
CG12172-RA	chr2R	3027419	3027420	7783	.	.	.	.	.	.	.	.	.	.	.	.
CG8376-RA	.	.	.	.	.	.	.	.	.	.	.	.	.	.	.	.
CG5596-RB	chr3R	23468226	23468227	15058	.	.	.	.	.	.	.	.	.	.	.	.
CG15282-RA	.	.	.	.	.	.	.	.	.	.	.	.	.	.	.	.
CG32491-RG	chr3R	17199263	17199264	0	chr3R	17218822	17218823	15702	chr3R	17220019	17220020	16899	.	.	.	.
CG9611-RE	chr3R	9510687	9510688	10291	.	.	.	.	.	.	.	.	.	.	.	.
CG17927-RD	chr2L	16787755	16787756	0	.	.	.	.	.	.	.	.	.	.	.	.
CG2666-RB	.	.	.	.	.	.	.	.	.	.	.	.	.	.	.	.
CG32209-RB	.	.	.	.	.	.	.	.	.	.	.	.	.	.	.	.
CG18507-RB	.	.	.	.	.	.	.	.	.	.	.	.	.	.	.	.
CG7225-RA	chr2R	15150183	15150184	11763	.	.	.	.	.	.	.	.	.	.	.	.
CG13906-RA	chr3L	900525	900526	8613	chr3L	872570	872571	36568	.	.	.	.	.	.	.	.
CG6883-RA	chr3L	378266	378267	949	.	.	.	.	.	.	.	.	.	.	.	.
CG34416-RN	chr3L	7721512	7721513	14761	.	.	.	.	.	.	.	.	.	.	.	.
CG30413-RA	.	.	.	.	.	.	.	.	.	.	.	.	.	.	.	.
CG18783-RB	chr2L	6088479	6088480	2937	chr2L	6079096	6079097	12320	.	.	.	.	.	.	.	.
CG14470-RA	.	.	.	.	.	.	.	.	.	.	.	.	.	.	.	.
CG31813-RA	.	.	.	.	.	.	.	.	.	.	.	.	.	.	.	.
CG12210-RA	.	.	.	.	.	.	.	.	.	.	.	.	.	.	.	.
CG11049-RG	.	.	.	.	.	.	.	.	.	.	.	.	.	.	.	.
CG4467-RA	.	.	.	.	.	.	.	.	.	.	.	.	.	.	.	.
CG9660-RE	chr2L	3080598	3080599	0	.	.	.	.	.	.	.	.	.	.	.	.
CG10382-RA	.	.	.	.	.	.	.	.	.	.	.	.	.	.	.	.
CG32150-RA	.	.	.	.	.	.	.	.	.	.	.	.	.	.	.	.
CG7526-RC	.	.	.	.	.	.	.	.	.	.	.	.	.	.	.	.
CG8587-RA	.	.	.	.	.	.	.	.	.	.	.	.	.	.	.	.
CG1342-RA	.	.	.	.	.	.	.	.	.	.	.	.	.	.	.	.
CG10591-RA	chr3L	5597381	5597382	4591	.	.	.	.	.	.	.	.	.	.	.	.
CG1157-RA	.	.	.	.	.	.	.	.	.	.	.	.	.	.	.	.
CG33715-RB	.	.	.	.	.	.	.	.	.	.	.	.	.	.	.	.
CG9614-RM	.	.	.	.	.	.	.	.	.	.	.	.	.	.	.	.
CG7816-RD	.	.	.	.	.	.	.	.	.	.	.	.	.	.	.	.
CG7283-RC	.	.	.	.	.	.	.	.	.	.	.	.	.	.	.	.
CG42684-RD	chrX	17645353	17645354	0	.	.	.	.	.	.	.	.	.	.	.	.
CG40263-RA	.	.	.	.	.	.	.	.	.	.	.	.	.	.	.	.
CG6024-RD	.	.	.	.	.	.	.	.	.	.	.	.	.	.	.	.
CG8493-RB	.	.	.	.	.	.	.	.	.	.	.	.	.	.	.	.
CG14253-RB	.	.	.	.	.	.	.	.	.	.	.	.	.	.	.	.
CG13377-RA	.	.	.	.	.	.	.	.	.	.	.	.	.	.	.	.
CG6611-RC	.	.	.	.	.	.	.	.	.	.	.	.	.	.	.	.
CG7847-RB	chr3R	13959655	13959656	185	.	.	.	.	.	.	.	.	.	.	.	.
CG9828-RB	chr2L	13177020	13177021	10950	.	.	.	.	.	.	.	.	.	.	.	.
CG15013-RA	.	.	.	.	.	.	.	.	.	.	.	.	.	.	.	.
CG9184-RA	chr3L	1334816	1334817	12013	chr3L	1352218	1352219	29415	.	.	.	.	.	.	.	.
CG6434-RA	.	.	.	.	.	.	.	.	.	.	.	.	.	.	.	.
CG31997-RA	.	.	.	.	.	.	.	.	.	.	.	.	.	.	.	.
CG13159-RA	.	.	.	.	.	.	.	.	.	.	.	.	.	.	.	.
CG32031-RC	chr3L	9037074	9037075	4887	chr3L	9035479	9035480	6482	chr3L	9034632	9034633	7329	chr3L	9034243	9034244	7718
CG8547-RB	chr2R	10158140	10158141	3020	.	.	.	.	.	.	.	.	.	.	.	.
CG15822-RB	.	.	.	.	.	.	.	.	.	.	.	.	.	.	.	.
CG17888-RF	.	.	.	.	.	.	.	.	.	.	.	.	.	.	.	.
CG3114-RH	.	.	.	.	.	.	.	.	.	.	.	.	.	.	.	.
CG3153-RA	.	.	.	.	.	.	.	.	.	.	.	.	.	.	.	.
CG17800-RBB	chr2R	3306271	3306272	36896	.	.	.	.	.	.	.	.	.	.	.	.
CG13475-RA	chr3L	14625246	14625247	32586	chr3L	14625532	14625533	32872	.	.	.	.	.	.	.	.
CG7047-RB	chr3L	162070	162071	14237	.	.	.	.	.	.	.	.	.	.	.	.
CG11502-RC	.	.	.	.	.	.	.	.	.	.	.	.	.	.	.	.
CG42280-RE	.	.	.	.	.	.	.	.	.	.	.	.	.	.	.	.
CG18004-RC	.	.	.	.	.	.	.	.	.	.	.	.	.	.	.	.
CG32490-RL	.	.	.	.	.	.	.	.	.	.	.	.	.	.	.	.
CG9739-RD	.	.	.	.	.	.	.	.	.	.	.	.	.	.	.	.
CG15427-RC	.	.	.	.	.	.	.	.	.	.	.	.	.	.	.	.
CG33991-RB	chr3L	14170756	14170757	27775	.	.	.	.	.	.	.	.	.	.	.	.
FlyExpress_Salm	chr2L	11445995	11445996	381	chr2L	11447798	11447799	2184	chr2L	11450691	11450692	5077	.	.	.	.
FlyExpress_Bun	chr2L	12529934	12529935	0	.	.	.	.	.	.	.	.	.	.	.	.
FlyExpress_CG15480	chr2L	13225403	13225404	197	chr2L	13227215	13227216	2009	chr2L	13235405	13235406	10199	chr2L	13245184	13245185	19978
FlyExpress_Su(H)	chr2L	15039353	15039354	134	chr2L	15038932	15038933	555	.	.	.	.	.	.	.	.
FlyExpress_Kel	chr2L	18150109	18150110	11899	.	.	.	.	.	.	.	.	.	.	.	.
FlyExpress_cad	chr2L	20770527	20770528	203	chr2L	20783315	20783316	180	.	.	.	.	.	.	.	.
FlyExpress_atet	.	.	.	.	.	.	.	.	.	.	.	.	.	.	.	.
FlyExpress_Rapgap1	.	.	.	.	.	.	.	.	.	.	.	.	.	.	.	.
FlyExpress_net	chr2L	89353	89354	1971	chr2L	91520	91521	4138	chr2L	91988	91989	4606	.	.	.	.
FlyExpress_Scat	chr2L	9449326	9449327	13985	.	.	.	.	.	.	.	.	.	.	.	.
Flyexpress_cyp310a1	.	.	.	.	.	.	.	.	.	.	.	.	.	.	.	.
FlyExpress_CG15094	chr2R	14690275	14690276	6092	.	.	.	.	.	.	.	.	.	.	.	.
FlyExpress_l(2)08717	chr2R	14690275	14690276	0	.	.	.	.	.	.	.	.	.	.	.	.
FlyExpress_CG5532	.	.	.	.	.	.	.	.	.	.	.	.	.	.	.	.
FlyExpress_CG2915	.	.	.	.	.	.	.	.	.	.	.	.	.	.	.	.
FlyExpress_Dap	chr2R	5602192	5602193	0	.	.	.	.	.	.	.	.	.	.	.	.
FlyExpress_inv	.	.	.	.	.	.	.	.	.	.	.	.	.	.	.	.
FlyExpress_Chrb	.	.	.	.	.	.	.	.	.	.	.	.	.	.	.	.
FlyExpress_CG9238	chr3L	14540178	14540179	0	.	.	.	.	.	.	.	.	.	.	.	.
FlyExpress_aos	chr3L	16484426	16484427	7676	chr3L	16468980	16468981	0	.	.	.	.	.	.	.	.
FlyExpress_CG2162	chr3L	3037895	3037896	0	.	.	.	.	.	.	.	.	.	.	.	.
FlyExpress_CG10479	chr3L	5975099	5975100	5992	chr3L	5976170	5976171	7063	chr3L	5976279	5976280	7172	chr3L	5987155	5987156	18048
FlyExpress_Dl	chr3R	15158054	15158055	6115	chr3R	15164946	15164947	13007	.	.	.	.	.	.	.	.
FlyExpress_bnl	chr3R	15690295	15690296	27756	chr3R	15625727	15625728	0	chr3R	15625123	15625124	0	.	.	.	.
FlyExpress_CG33099	chr3R	18353595	18353596	1046	.	.	.	.	.	.	.	.	.	.	.	.
FlyExpress_e(spl)m5-HLH	chr3R	21856502	21856503	1045	chr3R	21868052	21868053	12595	chr3R	21868630	21868631	13173	chr3R	21841124	21841125	13451
FlyExpress_Ama	chr3R	2588944	2588945	0	chr3R	2580238	2580239	8076	chr3R	2549554	2549555	38760	.	.	.	.
FlyExpress_CG11966	.	.	.	.	.	.	.	.	.	.	.	.	.	.	.	.
FlyExpress_CG12420	.	.	.	.	.	.	.	.	.	.	.	.	.	.	.	.
FlyExpress_yellow-e3	chr3R	9263166	9263167	32574	.	.	.	.	.	.	.	.	.	.	.	.
FlyExpress_mew	chrX	13190962	13190963	38439	.	.	.	.	.	.	.	.	.	.	.	.
FlyExpress_rst	chrX	2876668	2876669	8803	chrX	2879520	2879521	11655	.	.	.	.	.	.	.	.
